# Supplementary material
Source: publisher site journal article supplement (https://www.dovepress.com/article/484565)
Supplement: Supplementary file 1 [file get_supplementary_file.php]

**Table S1** PRISMA 2020 Checklist


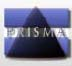


| **Section and Topic** | **Item #** | **Checklist item** | **Location where item is reported** |
| --- | --- | --- | --- |
| **TITLE** | | |  |
| Title | 1 | Identify the report as a systematic review. | 1 |
| **ABSTRACT** | | |  |
| Abstract | 2 | See the PRISMA 2020 for Abstracts checklist. | 2-3 |
| **INTRODUCTION** | | |  |
| Rationale | 3 | Describe the rationale for the review in the context of existing knowledge. | 3-5 |
| Objectives | 4 | Provide an explicit statement of the objective(s) or question(s) the review addresses. | 5 |
| **METHODS** | | |  |
| Eligibility criteria | 5 | Specify the inclusion and exclusion criteria for the review and how studies were grouped for the syntheses. | 6 |
| Information sources | 6 | Specify all databases, registers, websites, organisations, reference lists and other sources searched or consulted to identify studies. Specify the date when each source was last searched or consulted. | 5 |
| Search strategy | 7 | Present the full search strategies for all databases, registers and websites, including any filters and limits used. | Table S2 |
| Selection process | 8 | Specify the methods used to decide whether a study met the inclusion criteria of the review, including how many reviewers screened each record and each report retrieved, whether they worked independently, and if applicable, details of automation tools used in the process. | 7 |
| Data collection process | 9 | Specify the methods used to collect data from reports, including how many reviewers collected data from each report, whether they worked independently, any processes for obtaining or confirming data from study investigators, and if applicable, details of automation tools used in the process. | 7 |
| Data items | 10a | List and define all outcomes for which data were sought. Specify whether all results that were compatible with each outcome domain in each study were sought (e.g. for all measures, time points, analyses), and if not, the methods used to decide which results to collect. | 7 |
| 10b | List and define all other variables for which data were sought (e.g. participant and intervention characteristics, funding sources). Describe any assumptions made about any missing or unclear information. | 7 |
| Study risk of bias assessment | 11 | Specify the methods used to assess risk of bias in the included studies, including details of the tool(s) used, how many reviewers assessed each study and whether they worked independently, and if applicable, details of automation tools used in the process. | 7 |
| Effect measures | 12 | Specify for each outcome the effect measure(s) (e.g. risk ratio, mean difference) used in the synthesis or presentation of results. | 8 |
| Synthesis methods | 13a | Describe the processes used to decide which studies were eligible for each synthesis (e.g. tabulating the study intervention characteristics and comparing against the planned groups for each synthesis (item #5)). | 7 |
| 13b | Describe any methods required to prepare the data for presentation or synthesis, such as handling of missing summary statistics, or data conversions. | 8 |
| 13c | Describe any methods used to tabulate or visually display results of individual studies and syntheses. | 8 |
| 13d | Describe any methods used to synthesize results and provide a rationale for the choice(s). If meta-analysis was performed, describe the model(s), method(s) to identify the presence and extent of statistical heterogeneity, and software package(s) used. | 8 |
| 13e | Describe any methods used to explore possible causes of heterogeneity among study results (e.g. subgroup analysis, meta-regression). | 8 |
| 13f | Describe any sensitivity analyses conducted to assess robustness of the synthesized results. | 8 |
| Reporting bias assessment | 14 | Describe any methods used to assess risk of bias due to missing results in a synthesis (arising from reporting biases). | 7 |
| Certainty assessment | 15 | Describe any methods used to assess certainty (or confidence) in the body of evidence for an outcome. | 7 |
| **RESULTS** | | |  |
| Study selection | 16a | Describe the results of the search and selection process, from the number of records identified in the search to the number of studies included in the review, ideally using a flow diagram. | 8, Figure 1 |
| 16b | Cite studies that might appear to meet the inclusion criteria, but which were excluded, and explain why they were excluded. | NA |
| Study characteristics | 17 | Cite each included study and present its characteristics. | 8-9, Table 1 |
| Risk of bias in studies | 18 | Present assessments of risk of bias for each included study. | 9, Figure 2 |
| Results of individual studies | 19 | For all outcomes, present, for each study: (a) summary statistics for each group (where appropriate) and (b) an effect estimate and its precision (e.g. confidence/credible interval), ideally using structured tables or plots. | 9-11 |
| Results of syntheses | 20a | For each synthesis, briefly summarise the characteristics and risk of bias among contributing studies. | 9, Figure 2 |
| 20b | Present results of all statistical syntheses conducted. If meta-analysis was done, present for each the summary estimate and its precision (e.g. confidence/credible interval) and measures of statistical heterogeneity. If comparing groups, describe the direction of the effect. | 9-11 |
| 20c | Present results of all investigations of possible causes of heterogeneity among study results. | 15-16 |
| 20d | Present results of all sensitivity analyses conducted to assess the robustness of the synthesized results. | 13 |
| Reporting biases | 21 | Present assessments of risk of bias due to missing results (arising from reporting biases) for each synthesis assessed. | 13-14, Figure S1, Figure S2, Figure S3, Figure S4 and Figure S5 |
| Certainty of evidence | 22 | Present assessments of certainty (or confidence) in the body of evidence for each outcome assessed. | 14, Table S11 |
| **DISCUSSION** | | |  |
| Discussion | 23a | Provide a general interpretation of the results in the context of other evidence. | 14-16 |
| 23b | Discuss any limitations of the evidence included in the review. | 16 |
| 23c | Discuss any limitations of the review processes used. | 18 |
| 23d | Discuss implications of the results for practice, policy, and future research. | 17-19 |
| **OTHER INFORMATION** | | |  |
| Registration and protocol | 24a | Provide registration information for the review, including register name and registration number, or state that the review was not registered. | 5 |
| 24b | Indicate where the review protocol can be accessed, or state that a protocol was not prepared. | 5 |
| 24c | Describe and explain any amendments to information provided at registration or in the protocol. | NA |
| Support | 25 | Describe sources of financial or non-financial support for the review, and the role of the funders or sponsors in the review. | 20 |
| Competing interests | 26 | Declare any competing interests of review authors. | 20 |
| Availability of data, code and other materials | 27 | Report which of the following are publicly available and where they can be found: template data collection forms; data extracted from included studies; data used for all analyses; analytic code; any other materials used in the review. | Within the paper and its Supporting Information files. |

*From:*  Page MJ, McKenzie JE, Bossuyt PM, Boutron I, Hoffmann TC, Mulrow CD, et al. The PRISMA 2020 statement: an updated guideline for reporting systematic reviews. BMJ 2021;372:n71. doi: 10.1136/bmj.n71

For more information, visit: <http://www.prisma-statement.org/>

# Table S2 Search Strategies of Each Database

| **PubMed** |
| --- |
| #1 "Obesity"[Mesh] OR "Nutritional and Metabolic Diseases"[Mesh] OR "Nutrition Disorders"[Mesh] OR "Overnutrition"[Mesh] OR "Overweight"[Mesh] OR "Obesity Hypoventilation Syndrome"[Mesh] OR "Obesity, Abdominal"[Mesh] OR "Obesity, Maternal"[Mesh] OR "Obesity, Metabolically Benign"[Mesh] OR "Obesity, Morbid"[Mesh] OR "Pediatric Obesity"[Mesh] OR "Prader-Willi Syndrome"[Mesh] |
| #2 "Obesity"[Title/Abstract] OR "Simple Obesity"[Title/Abstract] |
| #3 #1 OR #2 |
| #4 "Acupuncture"[Mesh] OR "Acupuncture Therapy"[Mesh] OR "Complementary Therapies"[Mesh] |
| #5 "Acupuncture Therapy"[Title/Abstract] OR "Acupuncture"[Title/Abstract] OR "Acupoint*"[Title/Abstract] OR "Electronic acupuncture"[Title/Abstract] OR "Electro-acupuncture"[Title/Abstract] OR "Electroacupuncture"[Title/Abstract] OR "Body acupuncture"[Title/Abstract] OR "Manual-acupuncture"[Title/Abstract] OR "Complementary Therapies"[Title/Abstract] |
| #6 #4 OR #5 |
| #7 "Randomized Controlled Trial"[Publication Type] OR "clinical"[Title/Abstract] OR "trial"[Title/Abstract] OR "random"[Title/Abstract] |
| #8 #3 AND #6 AND #7 |

| **EMBASE** |
| --- |
| #1 'obesity'/exp OR 'nutritional and metabolic disorder'/exp OR 'nutritional disorder'/exp OR 'overnutrition'/exp OR 'abdominal obesity'/exp OR 'adolescent obesity'/exp OR 'childhood obesity'/exp OR 'diabetic obesity'/exp OR 'experimental obesity'/exp OR 'genetic obesity disorder'/exp OR 'lipedema'/exp OR 'maternal obesity'/exp OR 'metabolic syndrome X'/exp OR 'metabolically benign obesity'/exp OR 'morbid obesity'/exp OR 'normal weight obesity'/exp OR 'obesity associated inflammation'/exp OR 'obesity hypoventilation syndrome'/exp OR 'obesity related glomerulopathy'/exp OR 'sarcopenic obesity'/exp |
| #2 'obesity':ab,ti OR 'simple obesity':ab,ti |
| #3 #1 OR #2 |
| #4 'acupuncture'/exp |
| #5 'acupuncture therapy':ab,ti OR 'acupuncture':ab,ti OR 'needle':ab,ti OR 'acupoint':ab,ti OR 'body acupuncture':ab,ti OR 'manual acupuncture':ab,ti OR 'electronic acupuncture':ab,ti OR 'electro-acupuncture':ab,ti OR 'electroacupuncture':ab,ti OR 'complementary therapies':ab,ti |
| #6 #4 OR #5 |
| #7 'clinical trials as topic'/exp OR 'random allocation'/exp |
| #8 'clinical':ab,ti OR 'trial':ab,ti OR 'random':ab,ti |
| #9 #7 OR #8 |
| #10 #3 AND #6 AND #9 |

| **Web of Science** |
| --- |
| TS=(Obesity OR Simple Obesity OR Nutritional and Metabolic Diseases OR Nutrition Disorders OR Overnutrition OR Overweight OR Obesity Hypoventilation Syndrome OR Obesity, Abdominal OR Obesity, Maternal OR Obesity, Metabolically Benign OR Obesity, Morbid OR Pediatric Obesity OR Prader-Willi Syndrome) AND TS=(Acupuncture OR Acupuncture Therapy OR Needle OR Acupoint OR Body Acupuncture OR Manual Acupuncture OR Electronic Acupuncture OR Electro-acupuncture OR Electroacupuncture OR Complementary Therapies) AND TS=(Random* OR Clinical OR Trial) |

| **Cochrane Library** |
| --- |
| #1 MeSh descriptor: [Obesity] explode all trees |
| #2 MeSh descriptor: [Nutritional and Metabolic Diseases] explode all trees |
| #3 MeSh descriptor: [Nutrition Disorders] explode all trees |
| #4 MeSh descriptor: [Overnutrition] explode all trees |
| #5 MeSh descriptor: [Overweight] explode all trees |
| #6 MeSh descriptor: [Obesity Hypoventilation Syndrome] explode all trees |
| #7 MeSh descriptor: [Obesity, Abdominal ] explode all trees |
| #8 MeSh descriptor: [Obesity, Maternal] explode all trees |
| #9 MeSh descriptor: [Obesity, Metabolically Benign] explode all trees |
| #10 MeSh descriptor: [Obesity, Morbid] explode all trees |
| #11 MeSh descriptor: [Pediatric Obesity] explode all trees |
| #12 MeSh descriptor: [Prader-Willi Syndrome] explode all trees |
| #13 (Obesity):ti,ab,kw OR (Simple obesity):ti,ab,kw |
| #14 #1 OR #2 OR #3 OR #4 OR #5 OR #6 OR #7 OR #8 OR #9 OR #10 OR #11 OR #12 OR #13 |
| #15 MeSh descriptor: [Acupuncture] explode all trees |
| #16 MeSh descriptor: [Acupuncture Therapy] explode all trees |
| #17 MeSh descriptor: [Complementary Therapies] explode all trees |
| #18 (Acupuncture Therapy):ti,ab,kw OR (Acupuncture):ti,ab,kw OR (Needle):ti,ab,kw OR (Acupoint):ti,ab,kw OR (Body Acupuncture):ti,ab,kw OR (Manual Acupuncture):ti,ab,kw OR (Electronic Acupuncture):ti,ab,kw OR (Electro-acupuncture):ti,ab,kw OR (Electroacupuncture):ti,ab,kw OR (Complementary Therapies):ti,ab,kw |
| #19 #15 OR #16 OR #17 OR #18 |
| #20 (randomized controlled trial):ti,ab,kw OR (clinical):ti,ab,kw OR (trial):ti,ab,kw OR (random):ti,ab,kw |
| #21 #14 AND #19 AND #20 |

| **China National Knowledge Infrastructure** |
| --- |
| (SU%=(‘肥胖症’+‘营养和代谢性疾病’+‘营养障碍’+‘营养过剩’+‘肥胖，良性代谢’+‘妊娠期肥胖’ +‘肥胖症，病态’+‘肥胖低通气综合征’+‘Prader-Willi综合征’+‘肥胖，腹部’+‘儿童肥胖’+‘肥胖’+‘单纯性肥胖’)) AND (SU%=(‘针刺’+‘针刺疗法’+‘补充疗法’+‘电针’+‘体针’+‘手针’+‘毫针’+‘普针’)) AND (AB%=(‘随机对照’+‘随机’+‘RCT’)) |

| **Wanfang** |
| --- |
| 题名或关键词：(肥胖症 or 营养和代谢性疾病 or 营养障碍 or 营养过剩 or 肥胖，良性代谢 or 妊娠期肥胖 or 肥胖症，病态 or 肥胖低通气综合征 or Prader-Willi综合征 or 肥胖，腹部 or 儿童肥胖 or 肥胖 or 单纯性肥胖) and 题名或关键词：(针刺 or 针刺疗法 or 补充疗法 or 电针 or 体针 or 手针 or 毫针 or 普针) and 摘要：(随机对照 or 随机 or RCT) |

| **VIP** |
| --- |
| (M=(肥胖症 OR 营养和代谢性疾病 OR 营养障碍 OR 营养过剩 OR 肥胖，良性代谢 OR 妊娠期肥胖 OR 肥胖症，病态 OR 肥胖低通气综合征 OR Prader-Willi综合征 OR 肥胖，腹部 OR 儿童肥胖 OR 肥胖 OR 单纯性肥胖)) AND (M=(针刺 OR 针刺疗法 OR 补充疗法 OR 电针 OR 体针 OR 手针 OR 毫针 OR 普针)) AND (R=(随机对照 OR 随机 OR RCT)) |

O1-3ur 4fin5-10dings11-20 suggests 21,22that23 acupuncture24-30 could 31-35improve36 weight37-39 loss as well as glucose and lipid metabolism in simple obesity treatment when used as an adjunct to lifestyle interventions. Moreover, the changes in body weight, BMI, WC, BF %, and HOMA-IR have clinical significance. However, considering the shortcomings of this study, such as the low quality of most included studies and the low or very low certainty of the evidence, future high-quality and large-scale RCTs are needed to provide comprehensive and strong evidence for its clinical application in obesity management programs.

| **Chinese Biomedical Literature Database** |
| --- |
| (("RCT"[常用字段:智能] OR "随机"[常用字段:智能]) OR ("随机对照试验"[不加权:扩展])) AND (("补充疗法"[常用字段:智能] OR "普针"[常用字段:智能] OR "毫针"[常用字段:智能] OR "手针"[常用字段:智能] OR "体针"[常用字段:智能] OR "电针"[常用字段:智能] OR "针刺"[常用字段:智能]) OR ("补充疗法"[不加权:扩展] OR "针刺疗法"[不加权:扩展] OR "针刺"[不加权:扩展])) AND (("肥胖"[常用字段:智能] OR "单纯性肥胖"[常用字段:智能]) OR 儿童肥胖"[不加权:扩展] OR "肥胖，腹部"[不加权:扩展] OR "Prader-Willi综合征"[不加权:扩展] OR "肥胖低通气综合征"[不加权:扩展] OR "肥胖症，病态"[不加权:扩展] OR "妊娠期肥胖"[不加权:扩展] OR "肥胖，良性代谢"[不加权:扩展] OR "营养过剩"[不加权:扩展] OR "营养障碍"[不加权:扩展] OR "营养和代谢性疾病"[不加权:扩展] OR "肥胖症"[不加权:扩展])) |

**Table S3** All Relevant Results of the Included Studies

| **Study** | **Body weight (kg)** | **BMI (kg/m**2**)** | **WC (cm)** | **BF % (%)** | **FPG (mmol/L, mg/dL)** | **FINS (IU/mL,μU/mL, μIU/mL)** | **HOMA-IR** | **TC (mmol/L, mg/dL)** | **TG (mmol/L, mg/dL)** | **HDL-C (mmol/L, mg/dL)** | **LDL-C (mmol/L, mg/dL)** |
| --- | --- | --- | --- | --- | --- | --- | --- | --- | --- | --- | --- |
|
| Tong et al, 201140 | NA | T:29.38±2.92 | NA | NA | T:5.2±0.45 | NA | NA | T:4.79±1.03 | T:1.37±1.14 | NA | NA |
|
| C:31.35±3.26 | C:5.28±0.41 | C:5.11±0.98 | C:1.4±0.39 |
| Liang, 201341 | T:82.36±6.77 | T:26.51±3.43 | NA | NA | NA | T:6.94±3.27 | NA | NA | NA | NA | NA |
| C:84.2±6.73 | C:27.96±4.77 | C:10.35±3.47 |
| Zhang and Wu, 201642 | NA | T:22.8±2.02 | T:79.648±5.03 | T:12.23±4.09 | NA | NA | NA | T:4.78±0.24 | T:1.62±0.23 | NA | T:6.76±0.2 |
| C;26.8±1.78 | C:84.86±6.04 | C:18.9±2.89 | C:5.38±0.25 | C:2.04±0.26 | C:7.92±0.15 |
| Li et al, 201743 | NA | T:26.79±2.63 | NA | NA | NA | NA | NA | NA | NA | NA | NA |
| C:29.64±2.26 |
| Li et al, 201944 | T:70.3±7.65 | T:22.97±2.63 | T:90.47±4.42 | NA | NA | NA | NA | NA | NA | NA | NA |
| C:74.3±7.34 | C:24.9±3.33 | C:93.23±5.5 |
| Liu et al, 202145 | NA | T:27.04±1.09 | NA | T:31.69±2.58 | T:4.85±0.42 | T:17.05±2.59 | T:3.68±0.7 | T:3.42±0.61 | T:1.74±0.44 | NA | NA |
| C:29.6±1.18 | C:33.71±2.59 | C:5.25±0.43 | C:20.79±2.75 | C:4.85±0.74 | C:3.83±0.66 | C:2.15±0.79 |
| Min, 202146 | T:50.27±5.65 | T:20.49±1.52 | T:67.38±5.25 | NA | NA | NA | NA | NA | NA | NA | NA |
| C:62.87±8.65 | C:24.26±3.27 | C:84.38±8.46 |
| Zhang et al, 202147 | NA | T:31.63±4.75 | NA | T:29.51±7.8 | NA | NA | NA | NA | NA | NA | NA |
| C:31.41±2.43 | C:33.39±1.24 |
| Bi, 202248 | T:70.12±10.29 | T:24.54±1.81 | T:89.3±8.87 | T:26.94±5.34 | NA | NA | NA | T:4.66±0.73 | T:1.32±0.5 | T:1±0.12 | T:3.09±0.67 |
| C:76.77±10.74 | C:27.12±1.52 | C:97.05±8.08 | C:29.66±5.07 | C:4.66±0.81 | C:1.43±0.76 | C:1.01±0.13 | C:2.99±0.71 |
| Qi and Shi, 202249 | T:104.16±5.16 | T:31.3±2.21 | T:104.11±7.32 | T:35.36±5.04 | NA | NA | NA | T:4.77±0.69 | T:1.22±0.28 | NA | T:2.86±0.42 |
| C:109.31±8.06 | C:32.79±2.86 | C:107.51±6.26 | C:37.9±5.21 | C:5.13±0.81 | C:2.2±0.44 | C:3.37±0.61 |
| Jia et al, 202350 | T:62.29±6.13 | T:23.59±1.24 | T:86.55±4.74 | NA | NA | NA | NA | T:4.25±0.62 | T:1.72±0.51 | T:1.23±0.14 | T:2.31±0.4 |
| C:66.28±6.25 | C:25.83±1.35 | C:91.01±4.57 | C:4.76±0.7 | C:2.11±0.49 | C:1.09±0.12 | C:2.63±0.41 |
| Yang et al, 202351 | T:68.7±8.77 | T:27.03±3.57 | T:82.98±5.01 | NA | NA | NA | NA | NA | NA | NA | NA |
| C:74.07±13.05 | C:29.19±4.6 | C:87.15±7.67 |
| Li, 200552 | T:58.87±7.91 | NA | T:83.1±6.98 | T:30.62±4.81 | NA | NA | NA | T:161.91±  29.95 | T:108.86±  63.41 | T:49.26±7.62 | NA |
| C:60.48±6.35 | C:83.21±7.17 | C:30.64±4.9 | C:173.82±  43.34 | C:123.42±51 | C:51.03±9.75 |
| Luo, 200753 | NA | NA | NA | NA | NA | NA | NA | T:4.1±0.8 | T:1±0.2 | T:1.3±0.2 | T:2.4±0.2 |
| C:5.7±0.1 | C:1.6±0.5 | C:1.4±0.3 | C:3.2±0.4 |
| Xing, 200954 | T:65.68±6.07 | T:24.51±1.3 | NA | NA | NA | NA | NA | T:3.82±0.8 | T:1.25±0.26 | T:2.05±0.53 | T:2.89±0.67 |
| C:69.38±7.53 | C:25.6±1.31 | C:4.11±0.73 | C:1.3±0.29 | C:1.88±0.6 | C:3.06±0.62 |
| Zhao and  Shi, 201055 | T:71.93±10.56 | T:25.93±3.14 | T:92.7±6.27 | NA | NA | NA | NA | NA | NA | NA | NA |
| C:74.32±11.01 | C:26.59±3.08 | C:93.57±8.73 |
| Abdi et al, 201256 | T:81.23±1.68 | T:31.17±0.53 | T:95.12±1.2 | T:36.03±0.7 | T:87.46±1.33 | NA | NA | T:148.18±  3.92 | T:92.51±4.4 | T:38.51±0.88 | T:91.34±3.48 |
| C:82.81±1.81 | C:31.87±0.61 | C:96.66±1.26 | C:36.54±0.84 | C:89.64±3.4 | C:162.23±  3.72 | C:122.97±5.68 | C:38.16±0.94 | C:99.92±2.89 |
| Wang and Xiao, 201457 | T:68.2±3.8 | T:23.1±1.3 | NA | T:29.3±3.3 | NA | NA | NA | NA | NA | NA | NA |
| C:74.2±4.2 | C:26.2±1.4 | C:31.3±4 |
| Bae, 201658 | T:67.32±9.54 | T:25.78±3.02 | T:84.85±8.14 | T:32.13±3.42 | NA | NA | NA | NA | NA | NA | NA |
| C:77.98±18.19 | C:28.66±4.21 | C:92.04±10.83 | C:35.27±5.5 |
| Xue et al, 201859 | T:70.08±5.62 | T:28.79±2.83 | NA | NA | NA | NA | NA | NA | NA | NA | NA |
| C:74.01±9.63 | C:31.78±6.08 |
| Yin et al, 201860 | T:71.65±6.39 | T:25.26±5.57 | NA | NA | NA | NA | NA | NA | NA | NA | NA |
| C:76.73±7.96 | C:28.59±8.36 |
| Wang, 202061 | T:75.39±10.64 | T:28.46±2.74 | T:94.59±7.36 | NA | NA | NA | NA | NA | NA | NA | NA |
| C:79.33±16.85 | C:29.01±3.61 | C:101±8.36 |
| Zheng et al, 202162 | NA | NA | NA | NA | NA | NA | NA | T:4.49±0.71 | T:1.49±0.24 | T:1.65±0.21 | T:1.82±0.59 |
| C:5.03±0.51 | C:1.91±0.66 | C:1±0.32 | C:2.62±0.98 |
| Liang, 202263 | NA | T:25.6±2.95 | T:84.61±7.4 | NA | NA | NA | NA | NA | NA | NA | NA |
| C:27.07±3.15 | C:89.5±9.11 |
| Ni et al, 202264 | T:75.83±17.79 | T:27.39±3.95 | T:91.98±11.33 | NA | T:5.19±0.46 | T:11.14±6.13 | T:2.59±1.42 | NA | NA | NA | NA |
| C:81.88±12.76 | C:29.81±4.7 | C:98.17±10.24 | C:5.71±0.89 | C:16.61±6.22 | C:4.25±1.85 |

**Abbreviations:** BF %, body fat percentage; BMI, body mass index; C, Control group; FINS, fasting serum insulin; FPG, fasting plasma glucose; HDL-C, high-density lipoprotein cholesterol; HOMA-IR, homeostasis model assessment-insulin resistance; LDL-C, low-density lipoprotein cholesterol; NA, not available; T, Trial group; TC, total cholesterol; TG, triglyceride; WC, waist circumference.

**Table S4** Leave-One-Out Sensitivity Analysis of Body Weight

| **Study omitted** | **MD (95% CI)** |
| --- | --- |
| Abdi et al, 201256 | -5.02 ( -6.39, -3.65) |
| Bae, 201658 | -4.53 ( -6.12, -2.93) |
| Bi, 202248 | -4.63 ( -6.26, -2.99) |
| Jia et al, 202350 | -4.80 ( -6.51, -3.08) |
| Li, 200552 | -4.95 ( -6.65, -3.26) |
| Li et al, 201944 | -4.78 ( -6.46, -3.10) |
| Liang, 201341 | -4.94 ( -6.63, -3.25) |
| Min, 202146 | -4.09 ( -5.44, -2.74) |
| Ni et al, 202264 | -4.69 ( -6.32, -3.06) |
| Qi and Shi, 202249 | -4.70 ( -6.38, -3.02) |
| Wang and Xiao, 201457 | -4.60 ( -6.24, -2.95) |
| Wang, 202061 | -4.74 ( -6.37, -3.12) |
| Xing, 200954 | -4.81 ( -6.50, -3.12) |
| Xue et al, 201859 | -4.79 ( -6.47, -3.10) |
| Yang et al, 202351 | -4.69 ( -6.35, -3.04) |
| Yin et al, 201860 | -4.71 ( -6.39, -3.02) |
| Zhao and Shi, 201055 | -4.84 ( -6.50, -3.19) |
| Combined | -4.73 ( -6.32, -3.13) |

**Abbreviations:** MD, mean difference; CI, confidence interval.

**Table S5** Leave-One-Out Sensitivity Analysis of BMI

| **Study omitted** | **MD (95% CI)** |
| --- | --- |
| Abdi et al, 201256 | -2.25 ( -2.73, -1.77) |
| Bae, 201658 | -2.08 ( -2.73, -1.44) |
| Bi, 202248 | -2.09 ( -2.75, -1.43) |
| Jia et al, 202350 | -2.10 ( -2.78, -1.43) |
| Li et al, 201743 | -2.08 ( -2.73, -1.42) |
| Li et al, 201944 | -2.12 ( -2.77, -1.47) |
| Liang, 201341 | -2.14 ( -2.79, -1.49) |
| Liang, 202263 | -2.14 ( -2.79, -1.49) |
| Liu et al, 202145 | -2.09 ( -2.76, -1.41) |
| Min, 202146 | -2.03 ( -2.67, -1.39) |
| Ni et al, 202264 | -2.10 ( -2.75, -1.46) |
| Qi and Shi, 202249 | -2.15 ( -2.80, -1.49) |
| Tong et al, 201140 | -2.12 ( -2.78, -1.47) |
| Wang and Xiao, 201457 | -2.06 ( -2.70, -1.41) |
| Wang, 202061 | -2.17 ( -2.81, -1.52) |
| Xing, 200954 | -2.17 ( -2.84, -1.50) |
| Xue et al, 201859 | -2.08 ( -2.73, -1.44) |
| Yang et al, 202351 | -2.11 ( -2.76, -1.46) |
| Yin et al, 201860 | -2.08 ( -2.72, -1.44) |
| Zhang and Wu, 201642 | -2.00 ( -2.57, -1.44) |
| Zhang et al, 202147 | -2.21 ( -2.85, -1.56) |
| Zhao and Shi, 201055 | -2.18 ( -2.83, -1.53) |
| Combined | -2.11 ( -2.75, -1.48) |

**Table S6** Leave-One-Out Sensitivity Analysis of WC

| **Study omitted** | **MD (95% CI)** |
| --- | --- |
| Abdi et al, 201256 | -5.31 ( -7.35, -3.27) |
| Bae, 201658 | -4.82 ( -6.81, -2.83) |
| Bi, 202248 | -4.76 ( -6.74, -2.78) |
| Jia et al, 202350 | -5.02 ( -7.13, -2.91) |
| Li, 200552 | -5.34 ( -7.39, -3.30) |
| Li et al, 201944 | -5.16 ( -7.26, -3.07) |
| Liang, 202263 | -4.97 ( -6.99, -2.95) |
| Min, 202146 | -3.88 ( -5.30, -2.46) |
| Ni et al, 202264 | -4.90 ( -6.88, -2.91) |
| Qi and Shi, 202249 | -5.09 ( -7.15, -3.04) |
| Wang, 202061 | -4.88 ( -6.87, -2.89) |
| Yang et al, 202351 | -5.04 ( -7.11, -2.97) |
| Zhang and Wu, 201642 | -4.96 ( -7.13, -2.80) |
| Zhao and Shi, 201055 | -5.26 ( -7.30, -3.23) |
| Combined | -4.96 ( -6.89, -3.03) |

**Table S7** Leave-One-Out Sensitivity Analysis of BF %

| **Study omitted** | **MD (95% CI)** |
| --- | --- |
| Abdi et al, 201256 | -2.92 ( -4.77, -1.07) |
| Bae, 201658 | -2.55 ( -4.60, -0.50) |
| Bi, 202248 | -2.60 ( -4.65, -0.55) |
| Li, 200552 | -2.92 ( -4.98, -0.86) |
| Liu et al, 202145 | -2.69 ( -4.98, -0.40) |
| Qi and Shi, 202249 | -2.62 ( -4.67, -0.57) |
| Wang and Xiao, 201457 | -2.69 ( -4.83, -0.55) |
| Zhang and Wu, 201642 | -1.87 ( -2.87, -0.87) |
| Zhang et al, 202147 | -2.47 ( -4.49, -0.45) |
| Combined | -2.61 ( -4.51, -0.71) |

**Table S8** Leave-One-Out Sensitivity Analysis of FPG

| **Study omitted** | **SMD (95% CI)** |
| --- | --- |
| Abdi et al, 201256 | -0.60 ( -1.09, -0.11) |
| Liu et al, 202145 | -0.58 ( -1.02, -0.14) |
| Ni et al, 202264 | -0.65 ( -1.10, -0.19) |
| Tong et al, 201140 | -0.85 ( -1.08, -0.61) |
| Combined | -0.66 ( -1.02, -0.31) |

**Abbreviation:** SMD, standard mean difference.

**Table S9** Leave-One-Out Sensitivity Analysis of TC and TG

| **Study omitted** | **SMD (95% CI)** |
| --- | --- |
| **TC** | |
| Abdi et al, 201256 | -0.88 ( -1.46, -0.30) |
| Bi, 202248 | -1.25 ( -1.98, -0.53) |
| Jia et al, 202350 | -1.18 ( -1.94, -0.41) |
| Li, 200552 | -1.22 ( -1.97, -0.48) |
| Liu et al, 202145 | -1.19 ( -1.96, -0.43) |
| Luo, 200753 | -0.99 ( -1.69, -0.28) |
| Qi and Shi, 202249 | -1.21 ( -1.96, -0.45) |
| Tong et al, 201140 | -1.22 ( -1.98, -0.47) |
| Xing, 200954 | -1.22 ( -1.96, -0.47) |
| Zhang and Wu, 201642 | -1.00 ( -1.67, -0.33) |
| Zheng et al, 202162 | -1.17 ( -1.92, -0.41) |
| Combined | -1.14 ( -1.83, -0.45) |
| **TG** | |
| Abdi et al, 201256 | -0.86 ( -1.35, -0.37) |
| Bi, 202248 | -1.43 ( -2.24, -0.62) |
| Jia et al, 202350 | -1.37 ( -2.20, -0.54) |
| Li, 200552 | -1.42 ( -2.24, -0.61) |
| Liu et al, 202145 | -1.38 ( -2.22, -0.55) |
| Luo, 200753 | -1.29 ( -2.10, -0.48) |
| Qi and Shi, 202249 | -1.18 ( -1.96, -0.41) |
| Tong et al, 201140 | -1.45 ( -2.25, -0.64) |
| Xing, 200954 | -1.43 ( -2.24, -0.62) |
| Zhang and Wu, 201642 | -1.28 ( -2.13, -0.43) |
| Zheng et al, 202162 | -1.36 ( -2.19, -0.54) |
| Combined | -1.31 ( -2.07, -0.56) |

**Table S10** Leave-One-Out Sensitivity Analysis of LDL-C54

| **Study omitted** | **SMD (95% CI)** |
| --- | --- |
| Abdi et al, 201256 | -1.69 ( -3.17, -0.21) |
| Bi, 202248 | -2.09 ( -3.49, -0.69) |
| Jia et al, 202350 | -1.96 ( -3.47, -0.45) |
| Luo, 200753 | -1.71 ( -3.15, -0.27) |
| Qi and Shi, 202249 | -1.93 ( -3.43, -0.43) |
| Xing, 200954 | -2.03 ( -3.48, -0.58) |
| Zhang and Wu, 201642 | -1.14 ( -1.94, -0.34) |
| Zheng et al, 202162 | -1.93 ( -3.42, -0.44) |
| Combined | -1.81 ( -3.11, -0.51) |

**Table S11** Quality of Evidence-Based on GRADE

| **Acupuncture + Lifestyle Interventions compared to Lifestyle Interventions for Simple Obesity** | | | | | | |
| --- | --- | --- | --- | --- | --- | --- |
| **Patient or population:** patients with simple obesity  **Intervention:** acupuncture + lifestyle interventions  **Comparison:** lifestyle interventions | | | | | | |
| **Outcomes** | **Illustrative comparative risk* (95% CI)** | | **Relative effect (95% CI)** | **No of Participants (studies)** | **Quality of the evidence (GRADE)** | **Comments** |
| **Assumed risk** | **Corresponding risk** |
| **Lifestyle interventions** | **Acupuncture + lifestyle interventions** |
| **Body weight** |  | The mean body weight in the intervention groups was **4.73 lower** (6.32 to 3.13 lower) |  | 1257 (17 studies) | ⊕⊝⊝⊝ **very low**1,3,5 |  |
| **BMI** |  | The mean bmi in the intervention groups was **2.11 lower** (2.75 to 1.48 lower) |  | 1830 (22 studies) | ⊕⊝⊝⊝ **very low**1,3 |  |
| **WC** |  | The mean wc in the intervention groups was **4.96 lower** (6.89 to 3.03 lower) |  | 1185 (14 studies) | ⊕⊝⊝⊝ **very low**1,3,5 |  |
| **BF %** |  | The mean bf % in the intervention groups was **2.61 lower** (4.51 to 0.71 lower) |  | 912 (9 studies) | ⊕⊝⊝⊝ **very low**1,3 |  |
| **FPG** |  | The mean fpg in the intervention groups was **0.66 standard deviations lower** (1.02 to 0.31 lower) |  | 426 (4 studies) | ⊕⊕⊝⊝ **low**1,2 | SMD -0.66 (-1.02 to -0.31) |
| **FINS** |  | The mean fins in the intervention groups was **1.12 standard deviations lower** (1.44 to 0.81 lower) |  | 207 (3 studies) | ⊕⊕⊝⊝ **low**1,4 | SMD -1.12 (-1.44 to -0.81) |
| **HOMA-IR** |  | The mean homa-ir in the intervention groups was **1.22 lower** (1.50 to 0.94 lower) |  | 147 (2 studies) | ⊕⊕⊝⊝ **low**1,4 |  |
| **TC** |  | The mean tc in the intervention groups was **1.14 standard deviations lower** (1.83 to 0.45 lower) |  | 1081 (11 studies) | ⊕⊝⊝⊝ **very low**1,3 | SMD -1.14 (-1.83 to -0.45) |
| **TG** |  | The mean tg in the intervention groups was **1.31 standard deviations lower** (2.07 to 0.56 lower) |  | 1081 (11 studies) | ⊕⊝⊝⊝ **very low**1,3 | SMD -1.31 (-2.07 to -0.56) |
| **HDL-C** |  | The mean hdl-c in the intervention groups was **0.47 standard deviations lower** (0.09 lower to 1.03 higher) |  | 560 (7 studies) | ⊕⊝⊝⊝ **very low**1,3 | SMD 0.47 (-0.09 to 1.03) |
| **LDL-C** |  | The mean ldl-c in the intervention groups was **1.81 standard deviations lower** (3.11 to 0.51 lower) |  | 802 (8 studies) | ⊕⊝⊝⊝ **very low**1,3 | SMD -1.81 (-3.11 to -0.51) |

**Notes:** *The basis for the assumed risk (e.g. the median control group risk across studies) is provided in footnotes. The corresponding risk (and its 95% conﬁdence interval) is based on the assumed risk in the comparison group and the relative effect of the intervention (and its 95% CI). GRADE Working Group grades of evidence High quality, Further research is very unlikely to change our conﬁdence in the estimate of effect. Moderate quality, Further research is likely to have an important impact on our conﬁdence in the estimate of effect and may change the estimate. Low quality, Further research is very likely to have an important impact on our conﬁdence in the estimate of effect and is likely to change the estimate. Very low quality, We are very uncertain about the estimate. 1Evidence downgraded by one level for serious risk of bias: randomization methods, allocation concealment, and blinding are not described. 2Evidence downgraded by one level for serious inconsistency 50%<I2<75%. 3Evidence downgraded by two levels for serious inconsistency I2≥75%. 4Evidence downgraded by one level for serious imprecision, low number of events (total number of events < 300). 5Evidence downgraded by one level for publication bias.

**Abbreviations:** BF %, body fat percentage; BMI, body mass index; CI, confidence interval; FINS, fasting serum insulin; FPG, fasting plasma glucose; GRADE, Grading of Recommendations Assessment, Development and Evaluation; HDL-C, high-density lipoprotein cholesterol; HOMA-IR, homeostasis model assessment-insulin resistance; LDL-C, low-density lipoprotein cholesterol; MD, mean difference; SMD, standard mean difference; TC, total cholesterol; TG, triglyceride; WC, waist circumference.


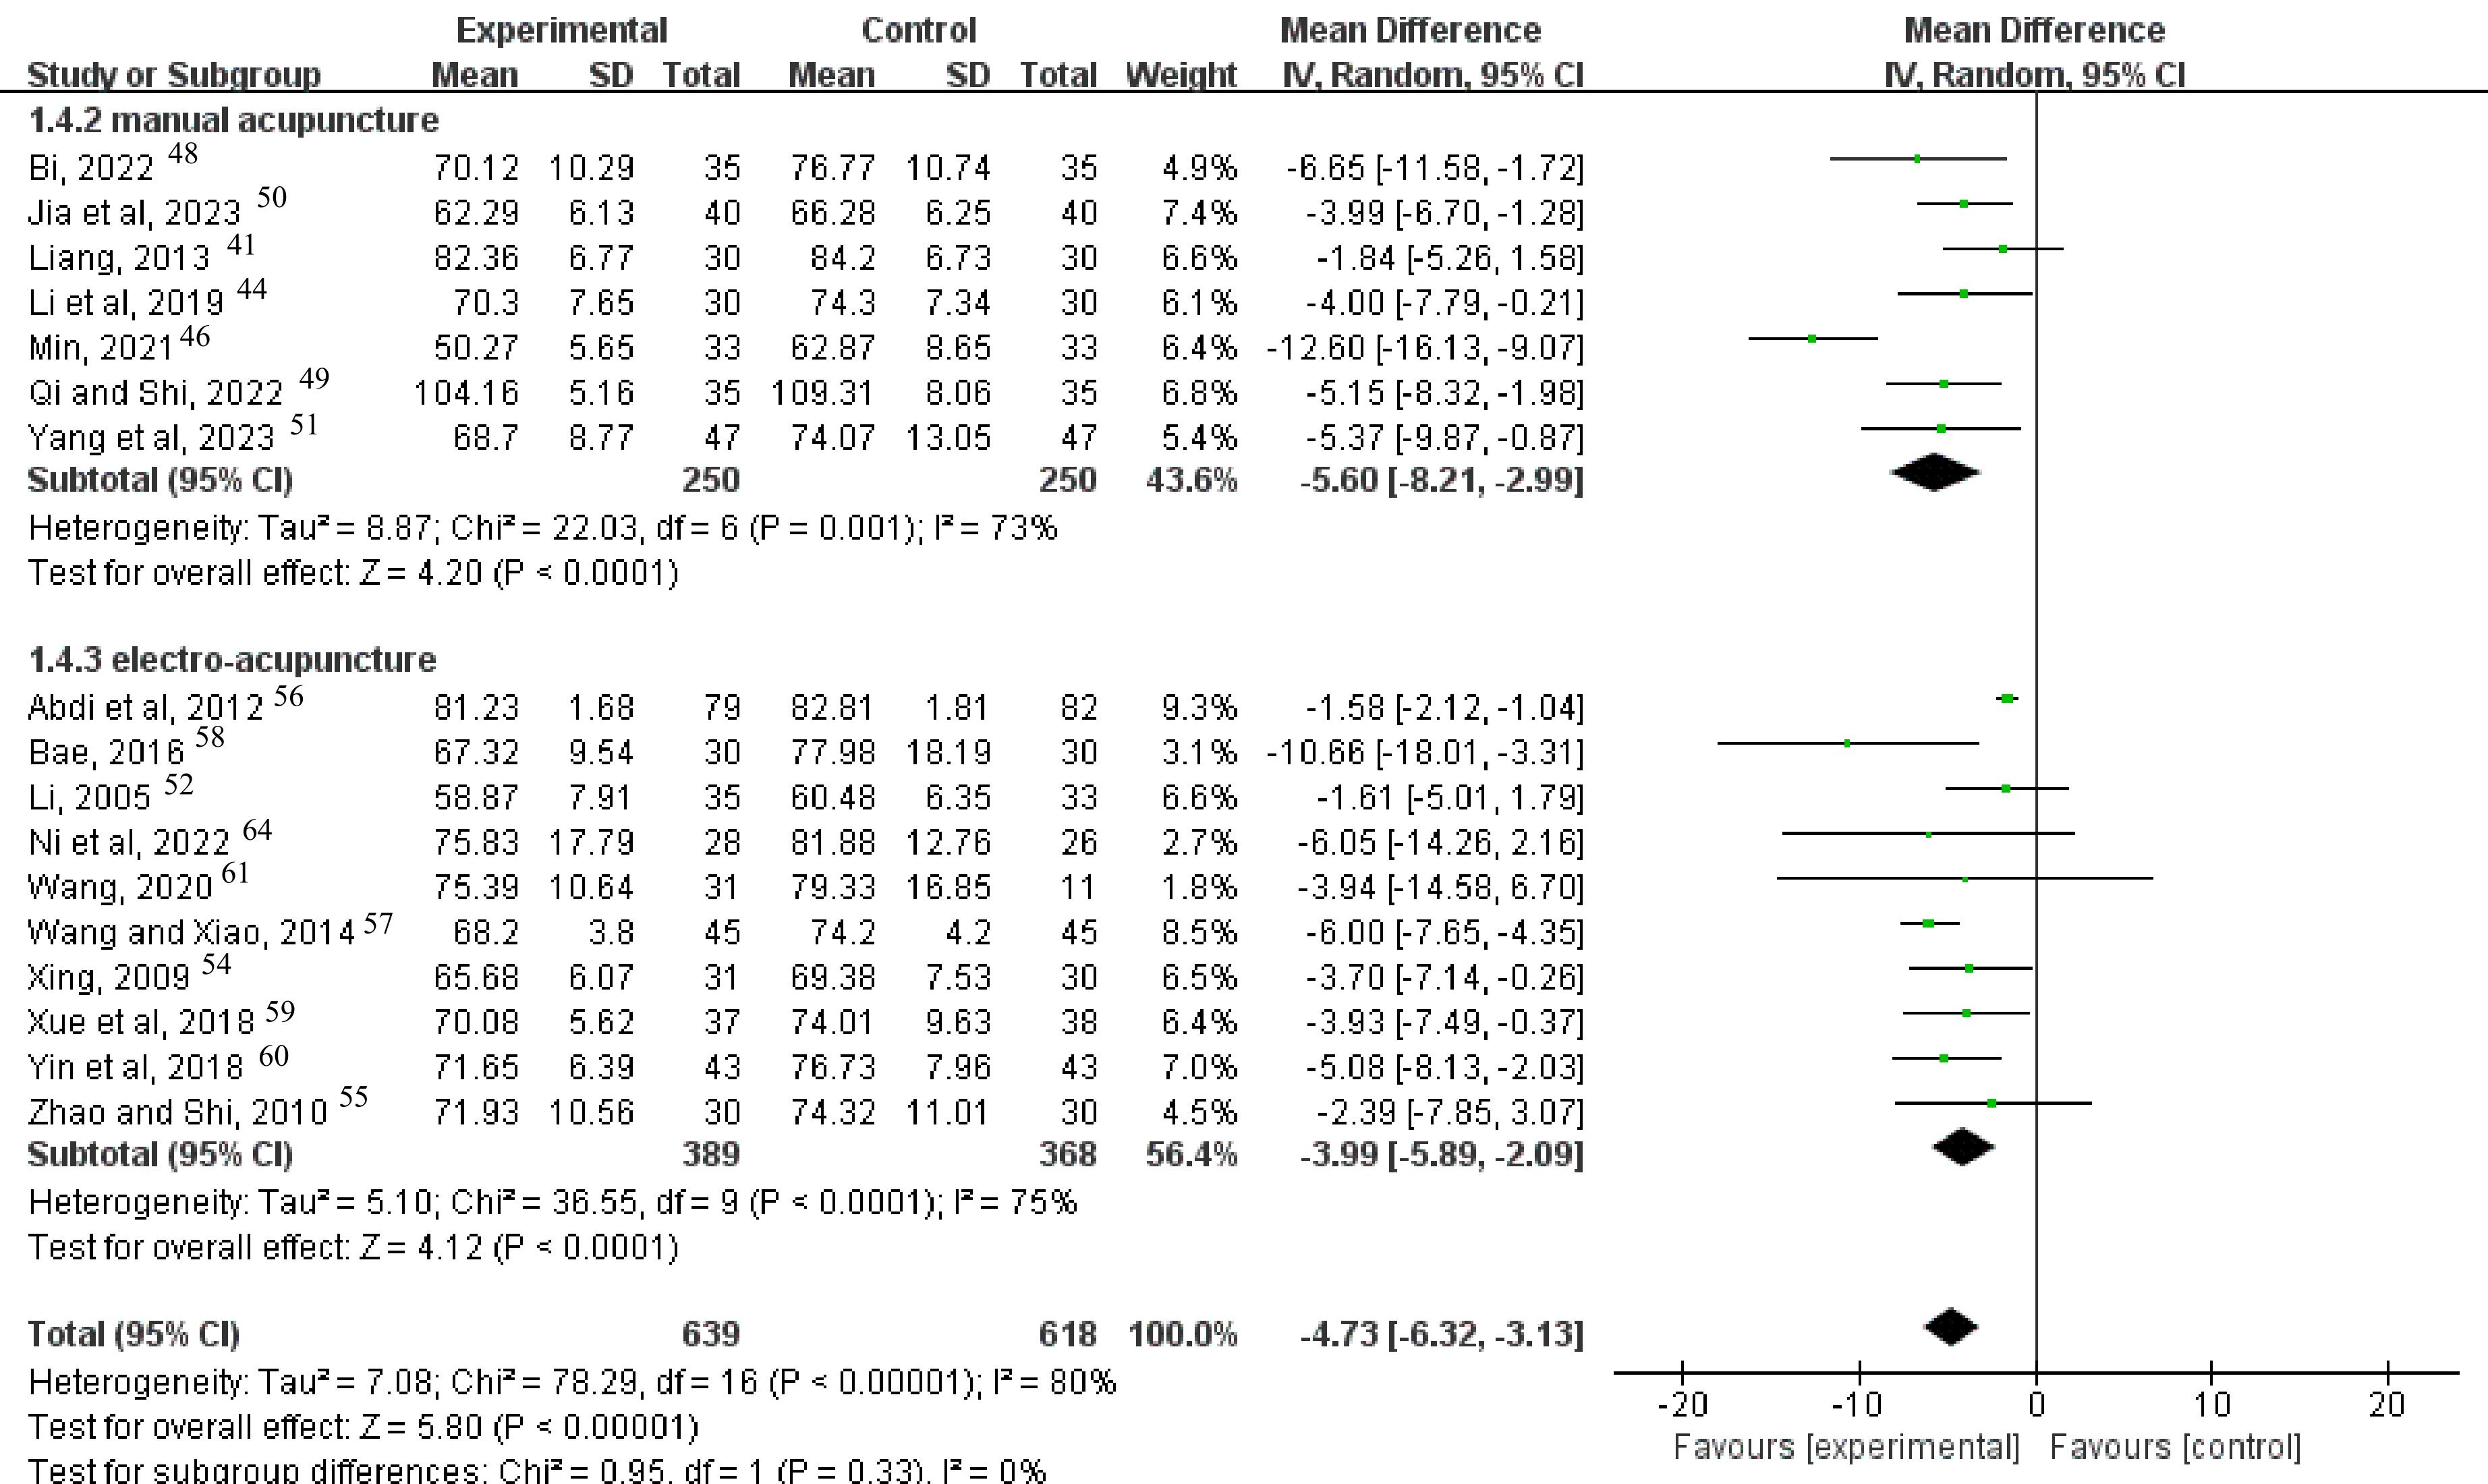


**Figure S1** Subgroup analysis of different acupuncture interventions on body weight.


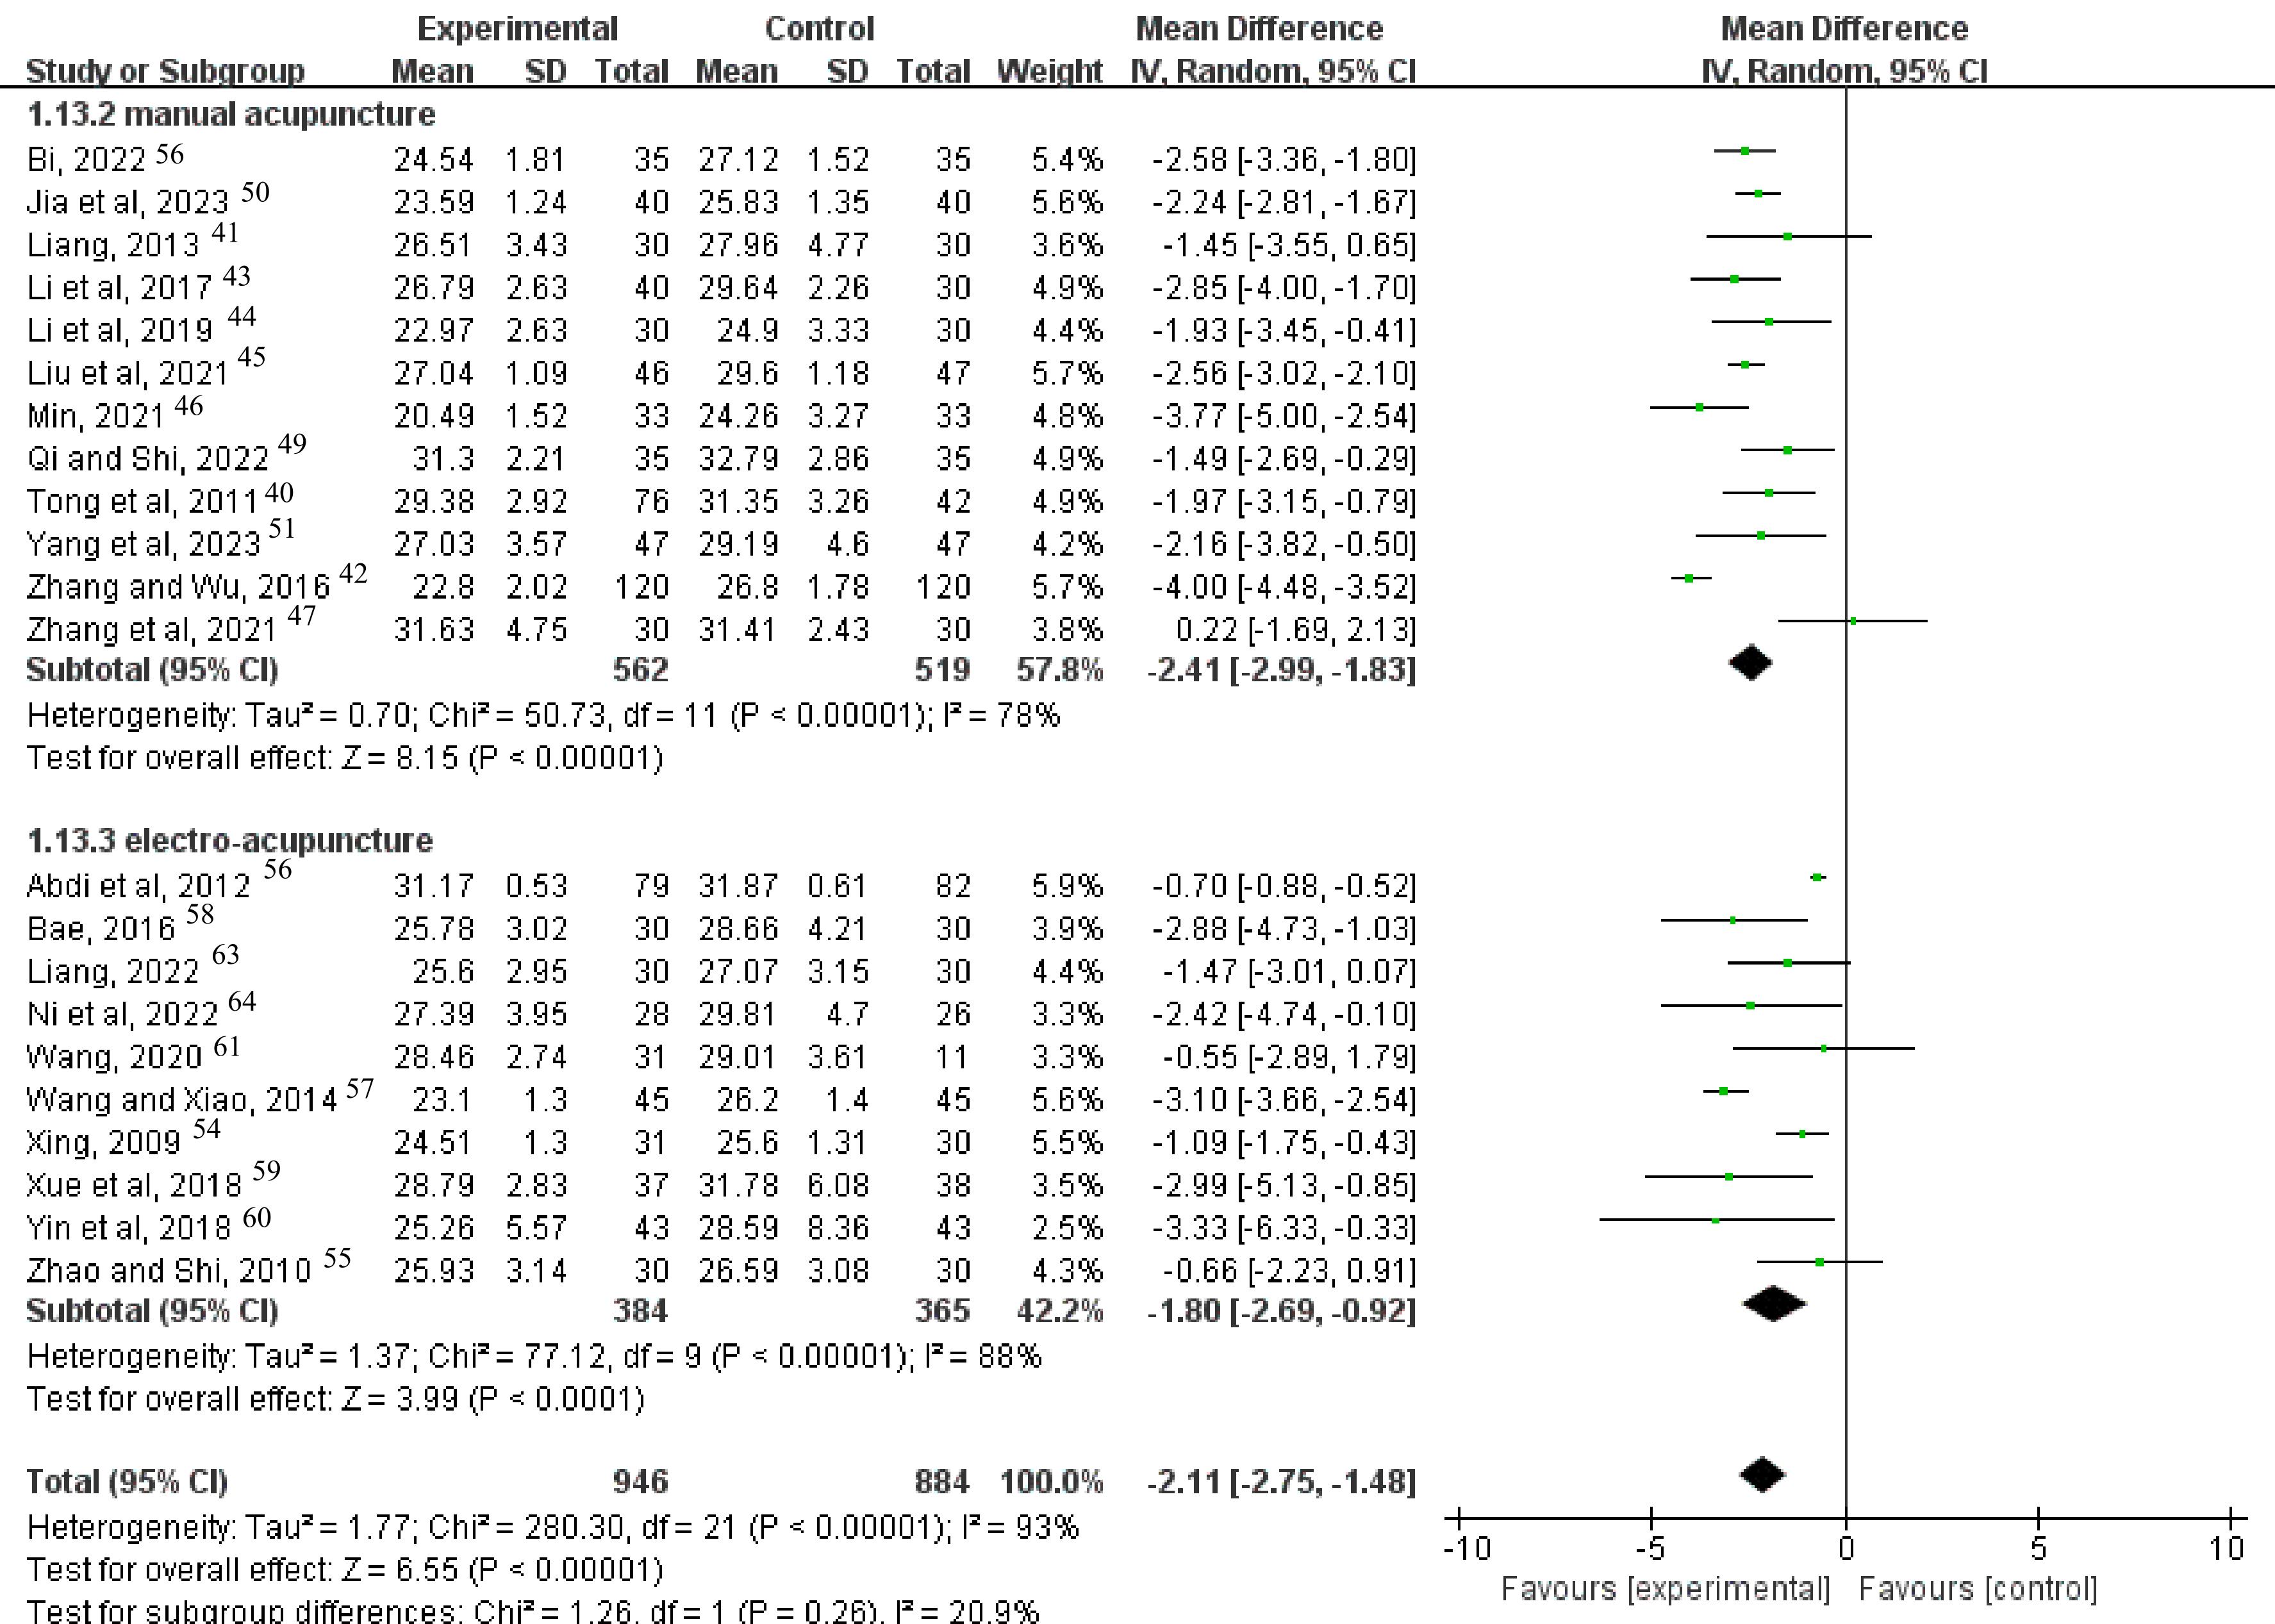


**Figure S2** Subgroup analysis of different acupuncture interventions on BMI.


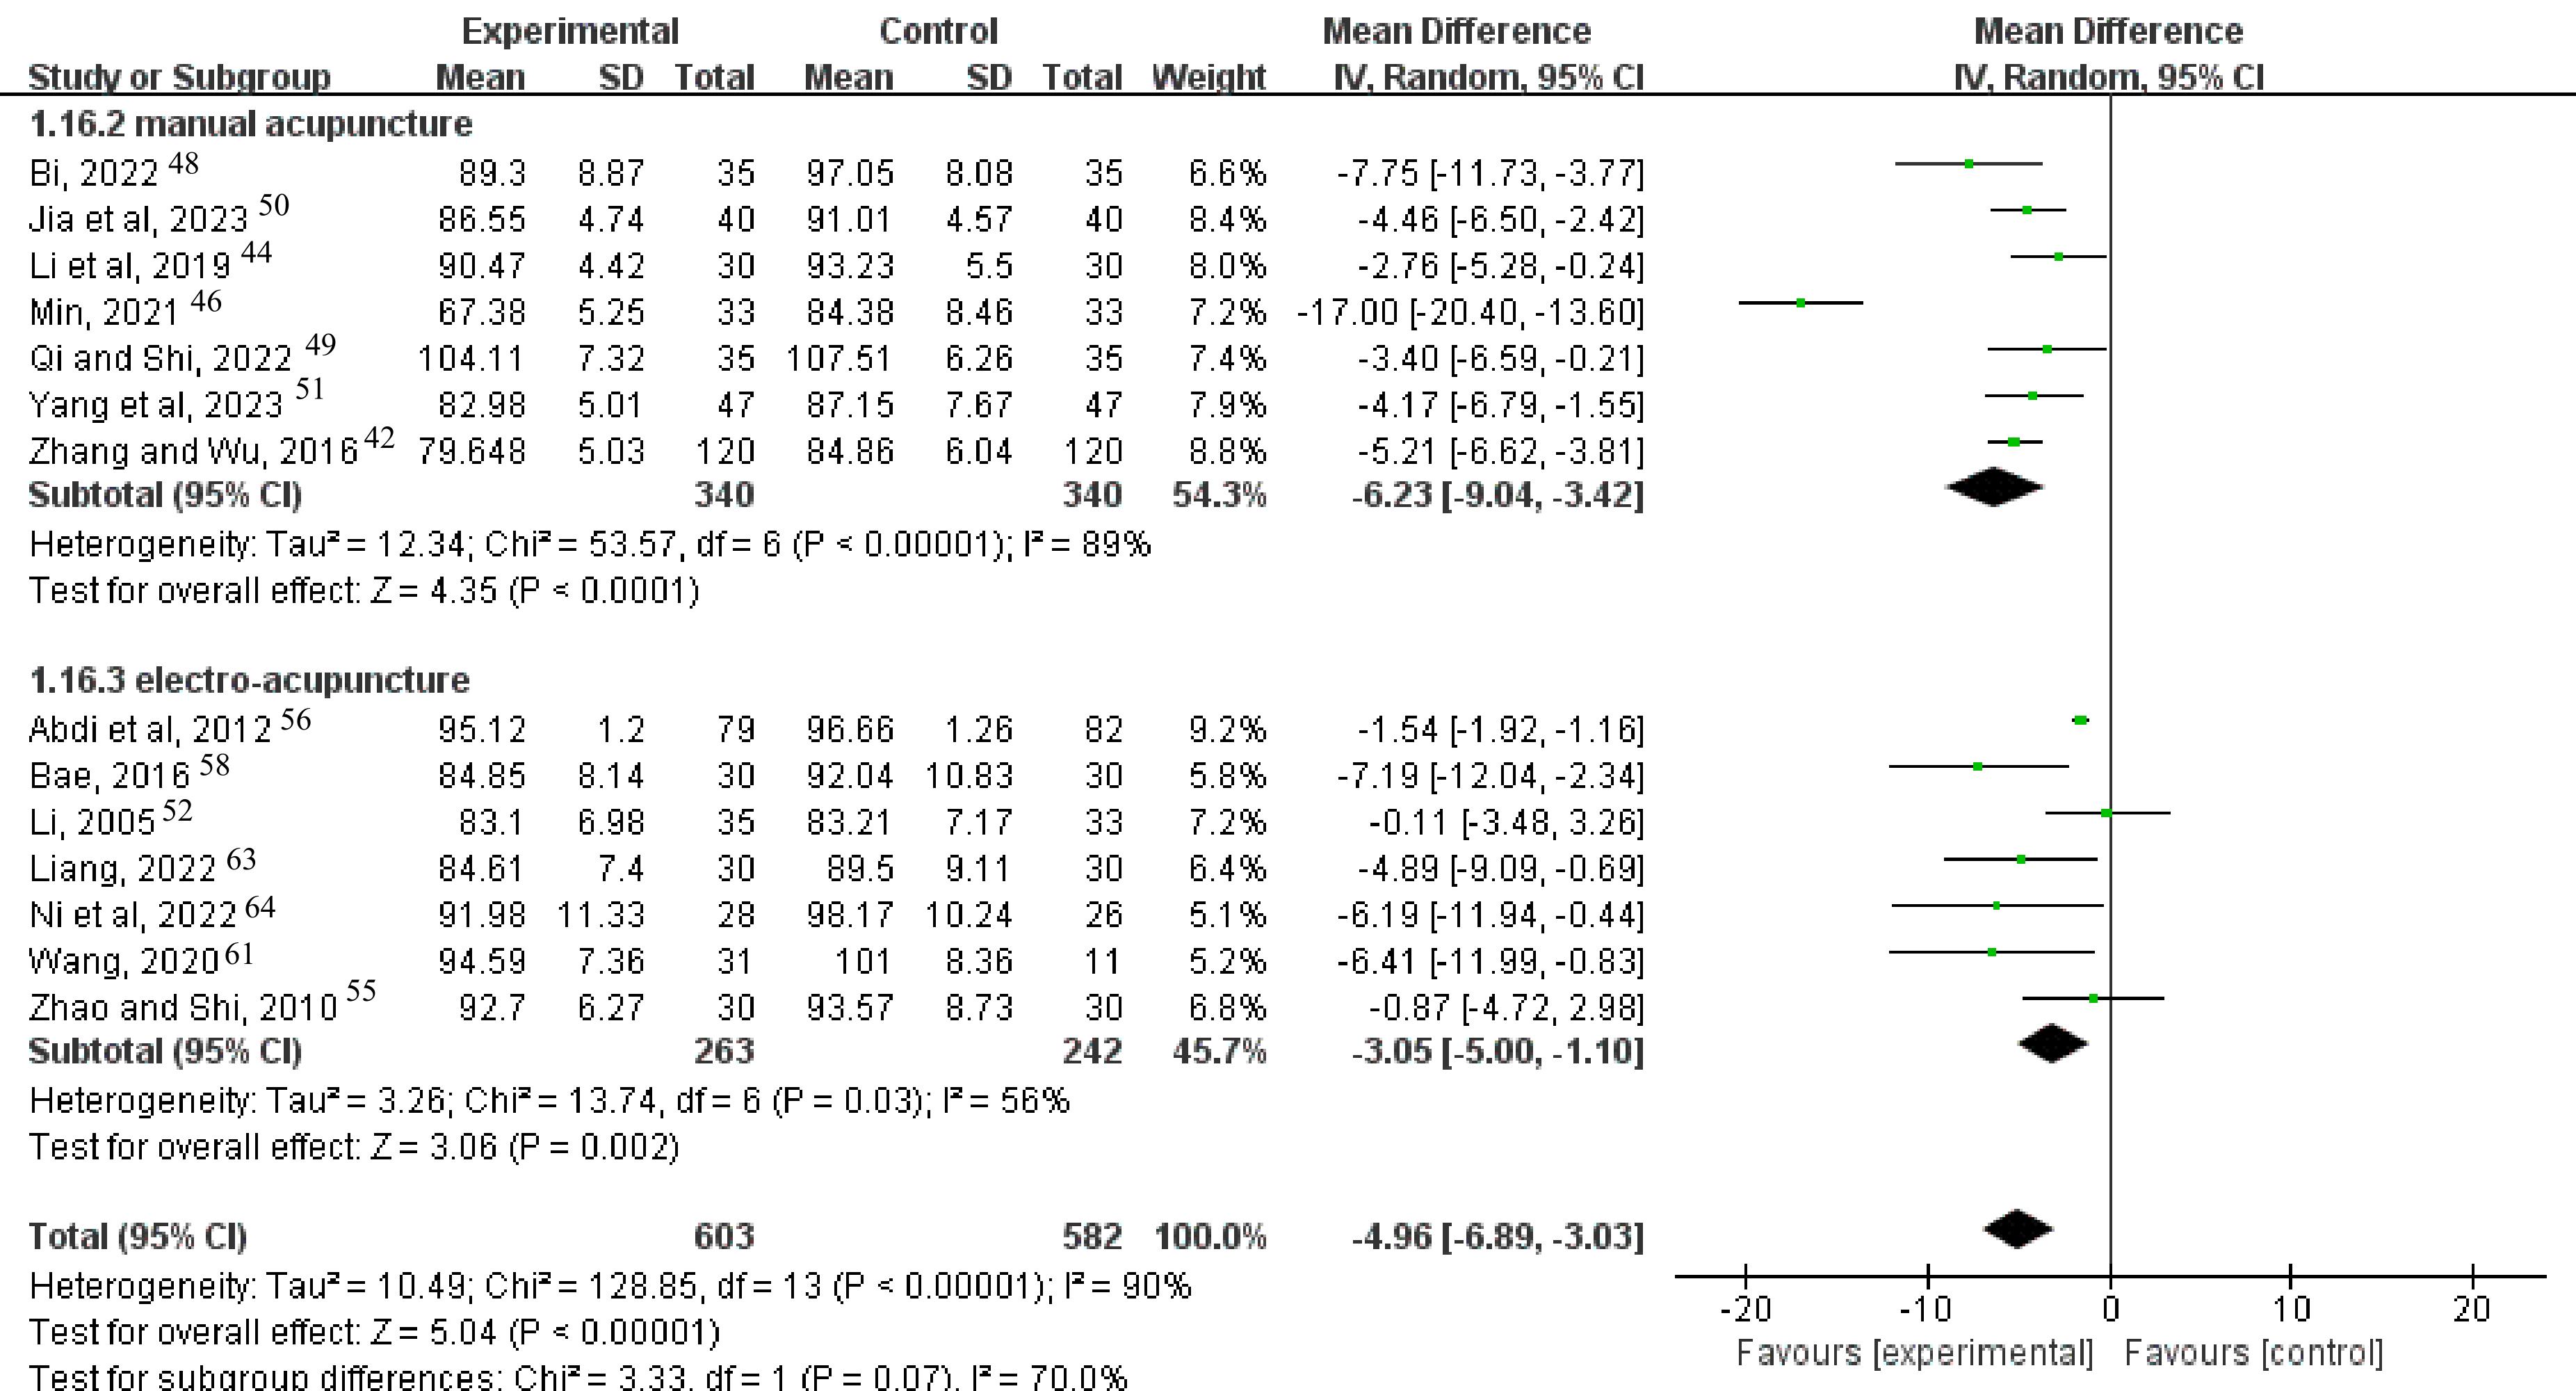


**Figure S3** Subgroup analysis of different acupuncture interventions on WC.


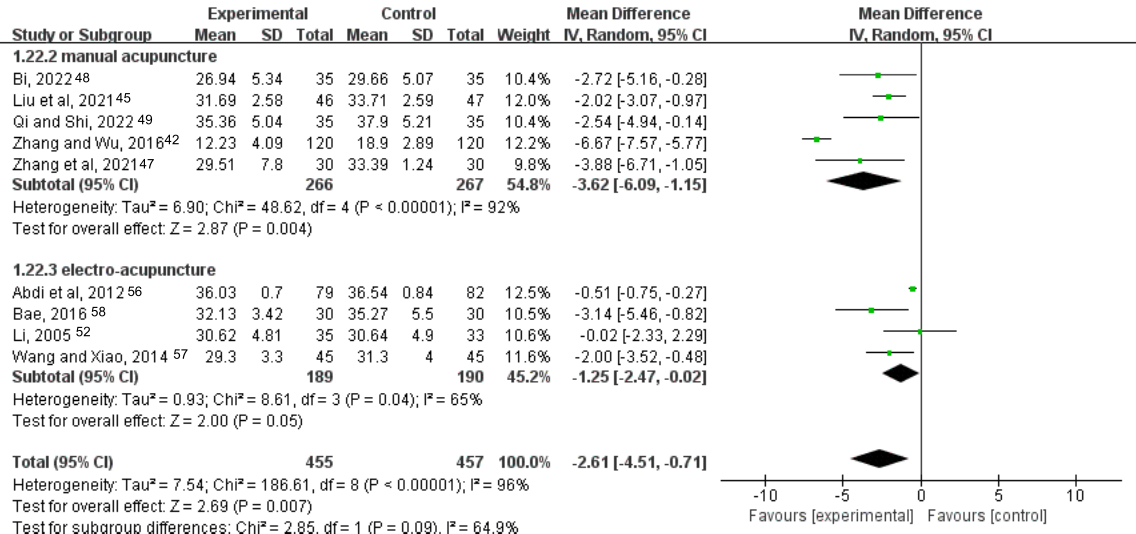


**Figure S4** Subgroup analysis of different acupuncture interventions on BF %.


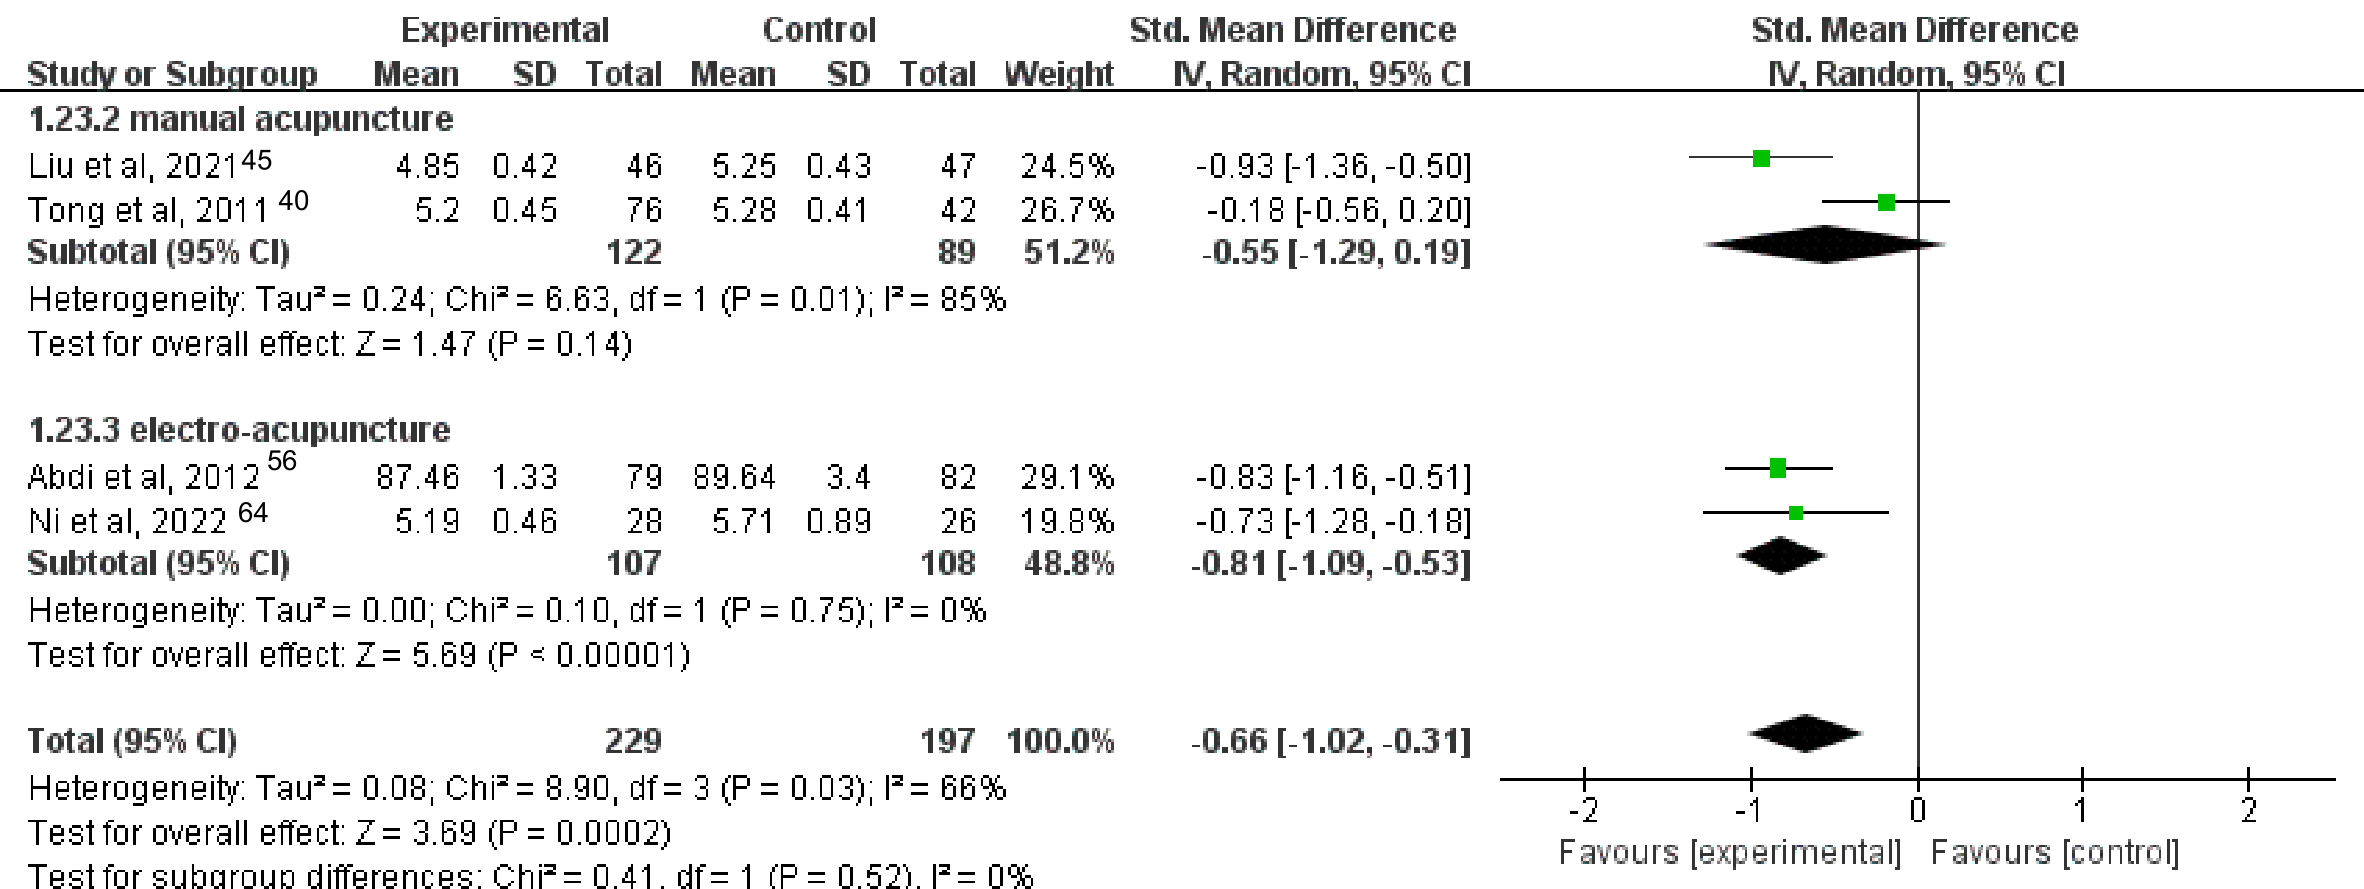


**Figure S5** Subgroup analysis of different acupuncture interventions on FPG.


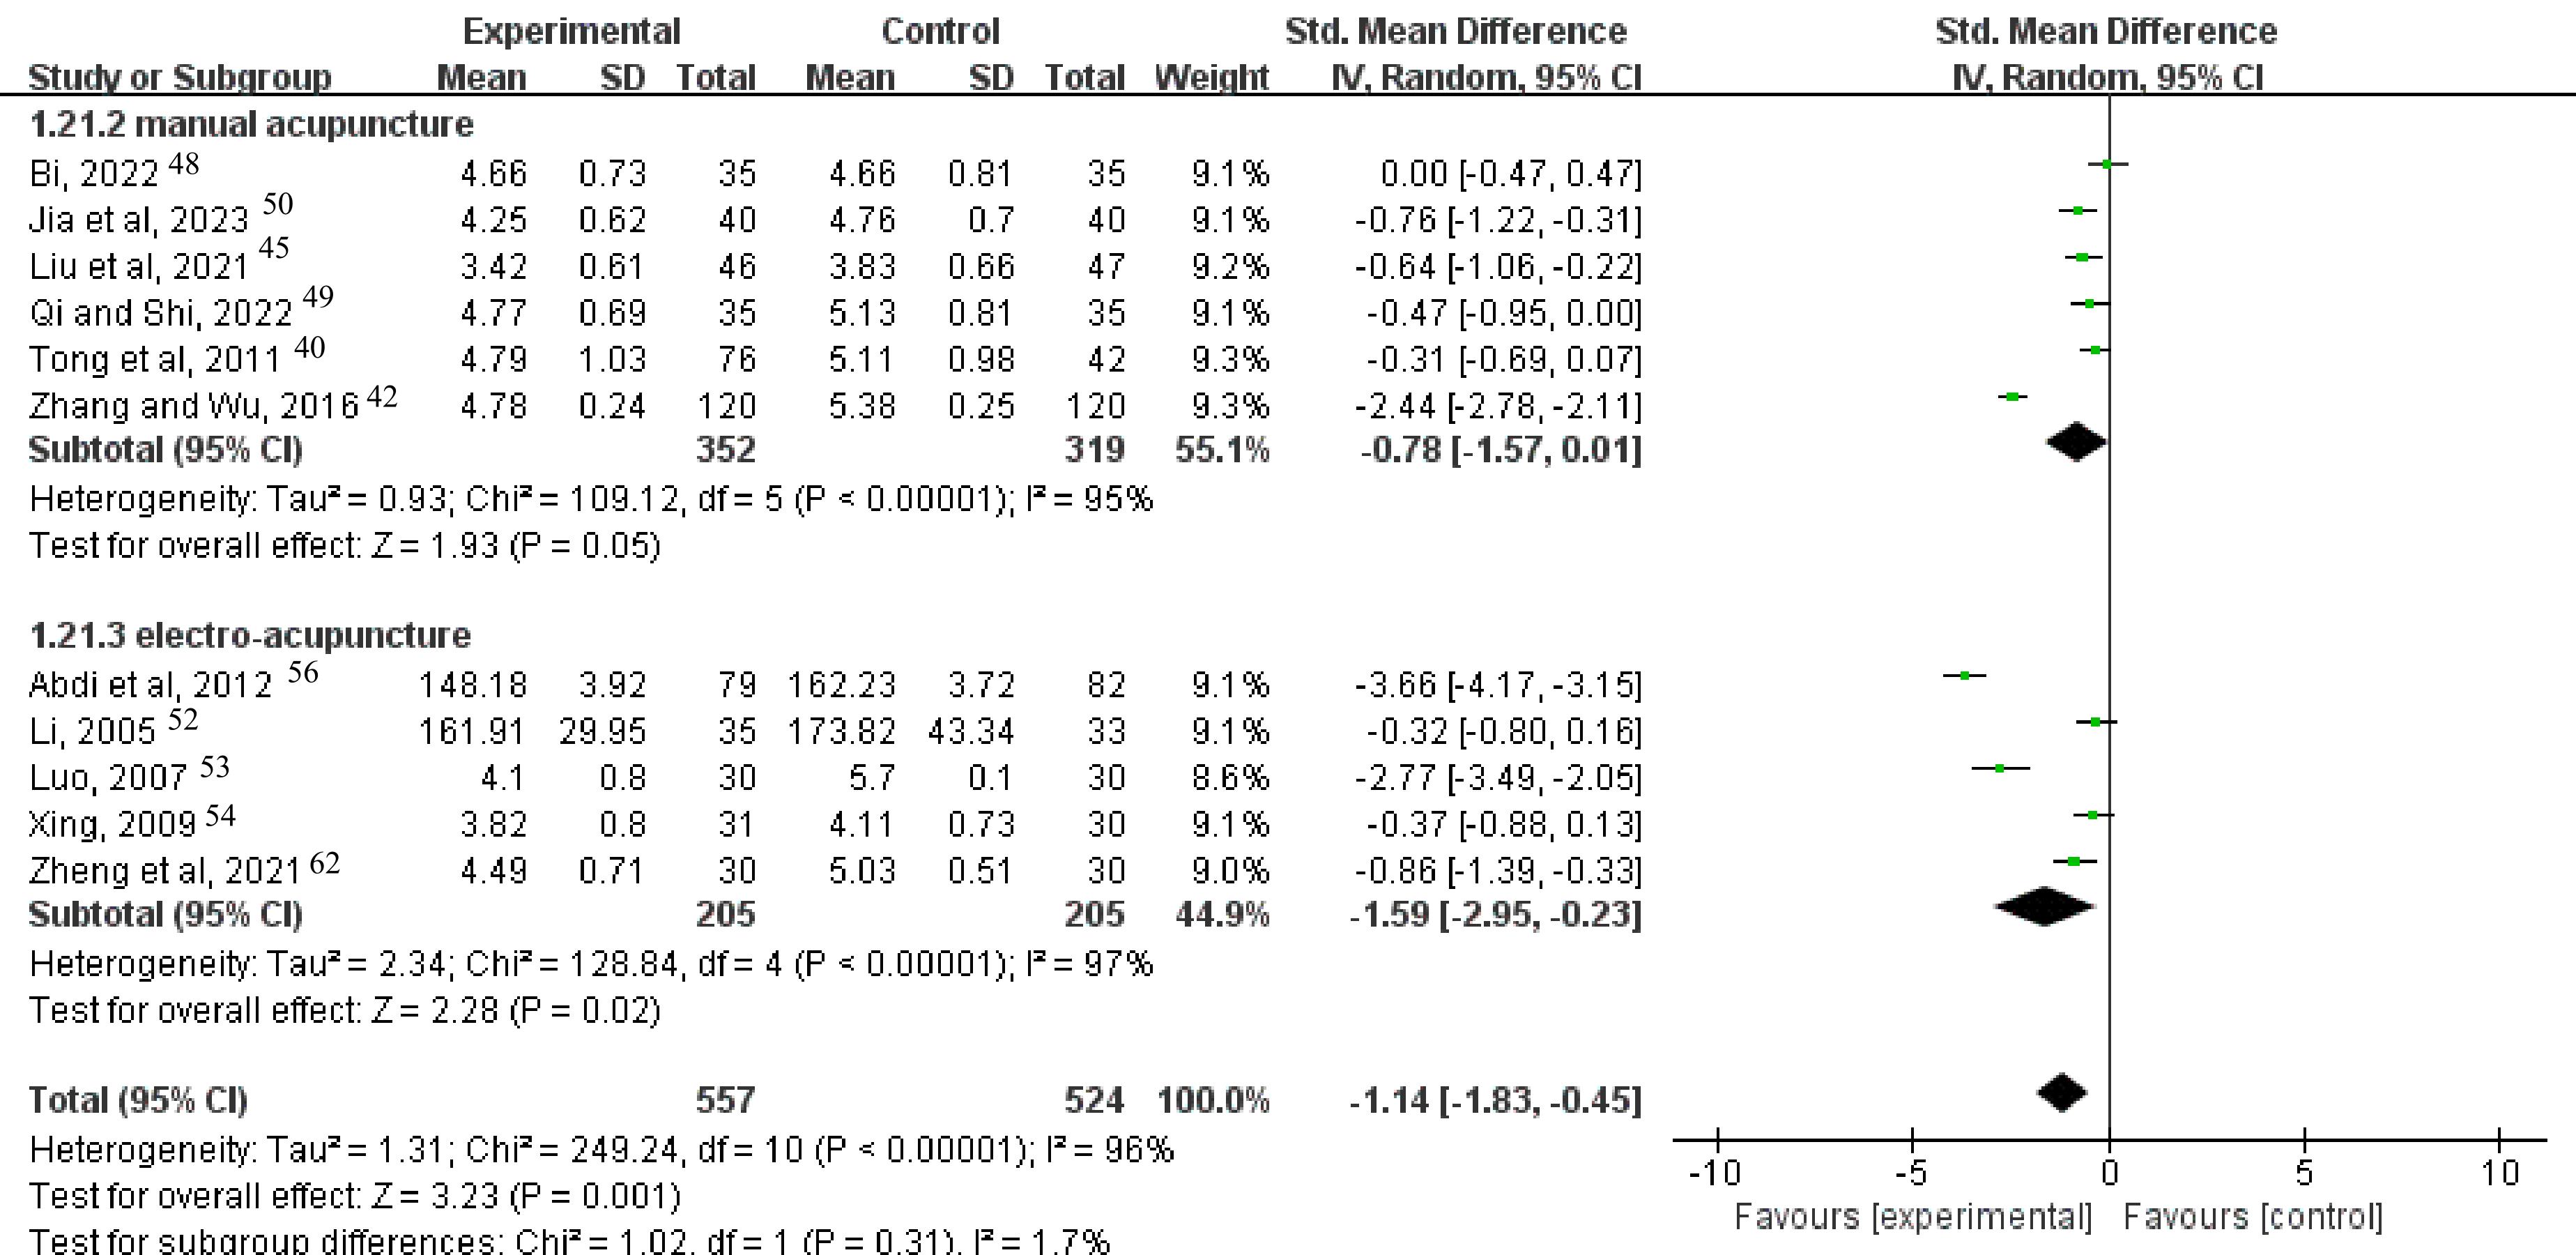


**Figure S6** Subgroup analysis of different acupuncture interventions on TC.


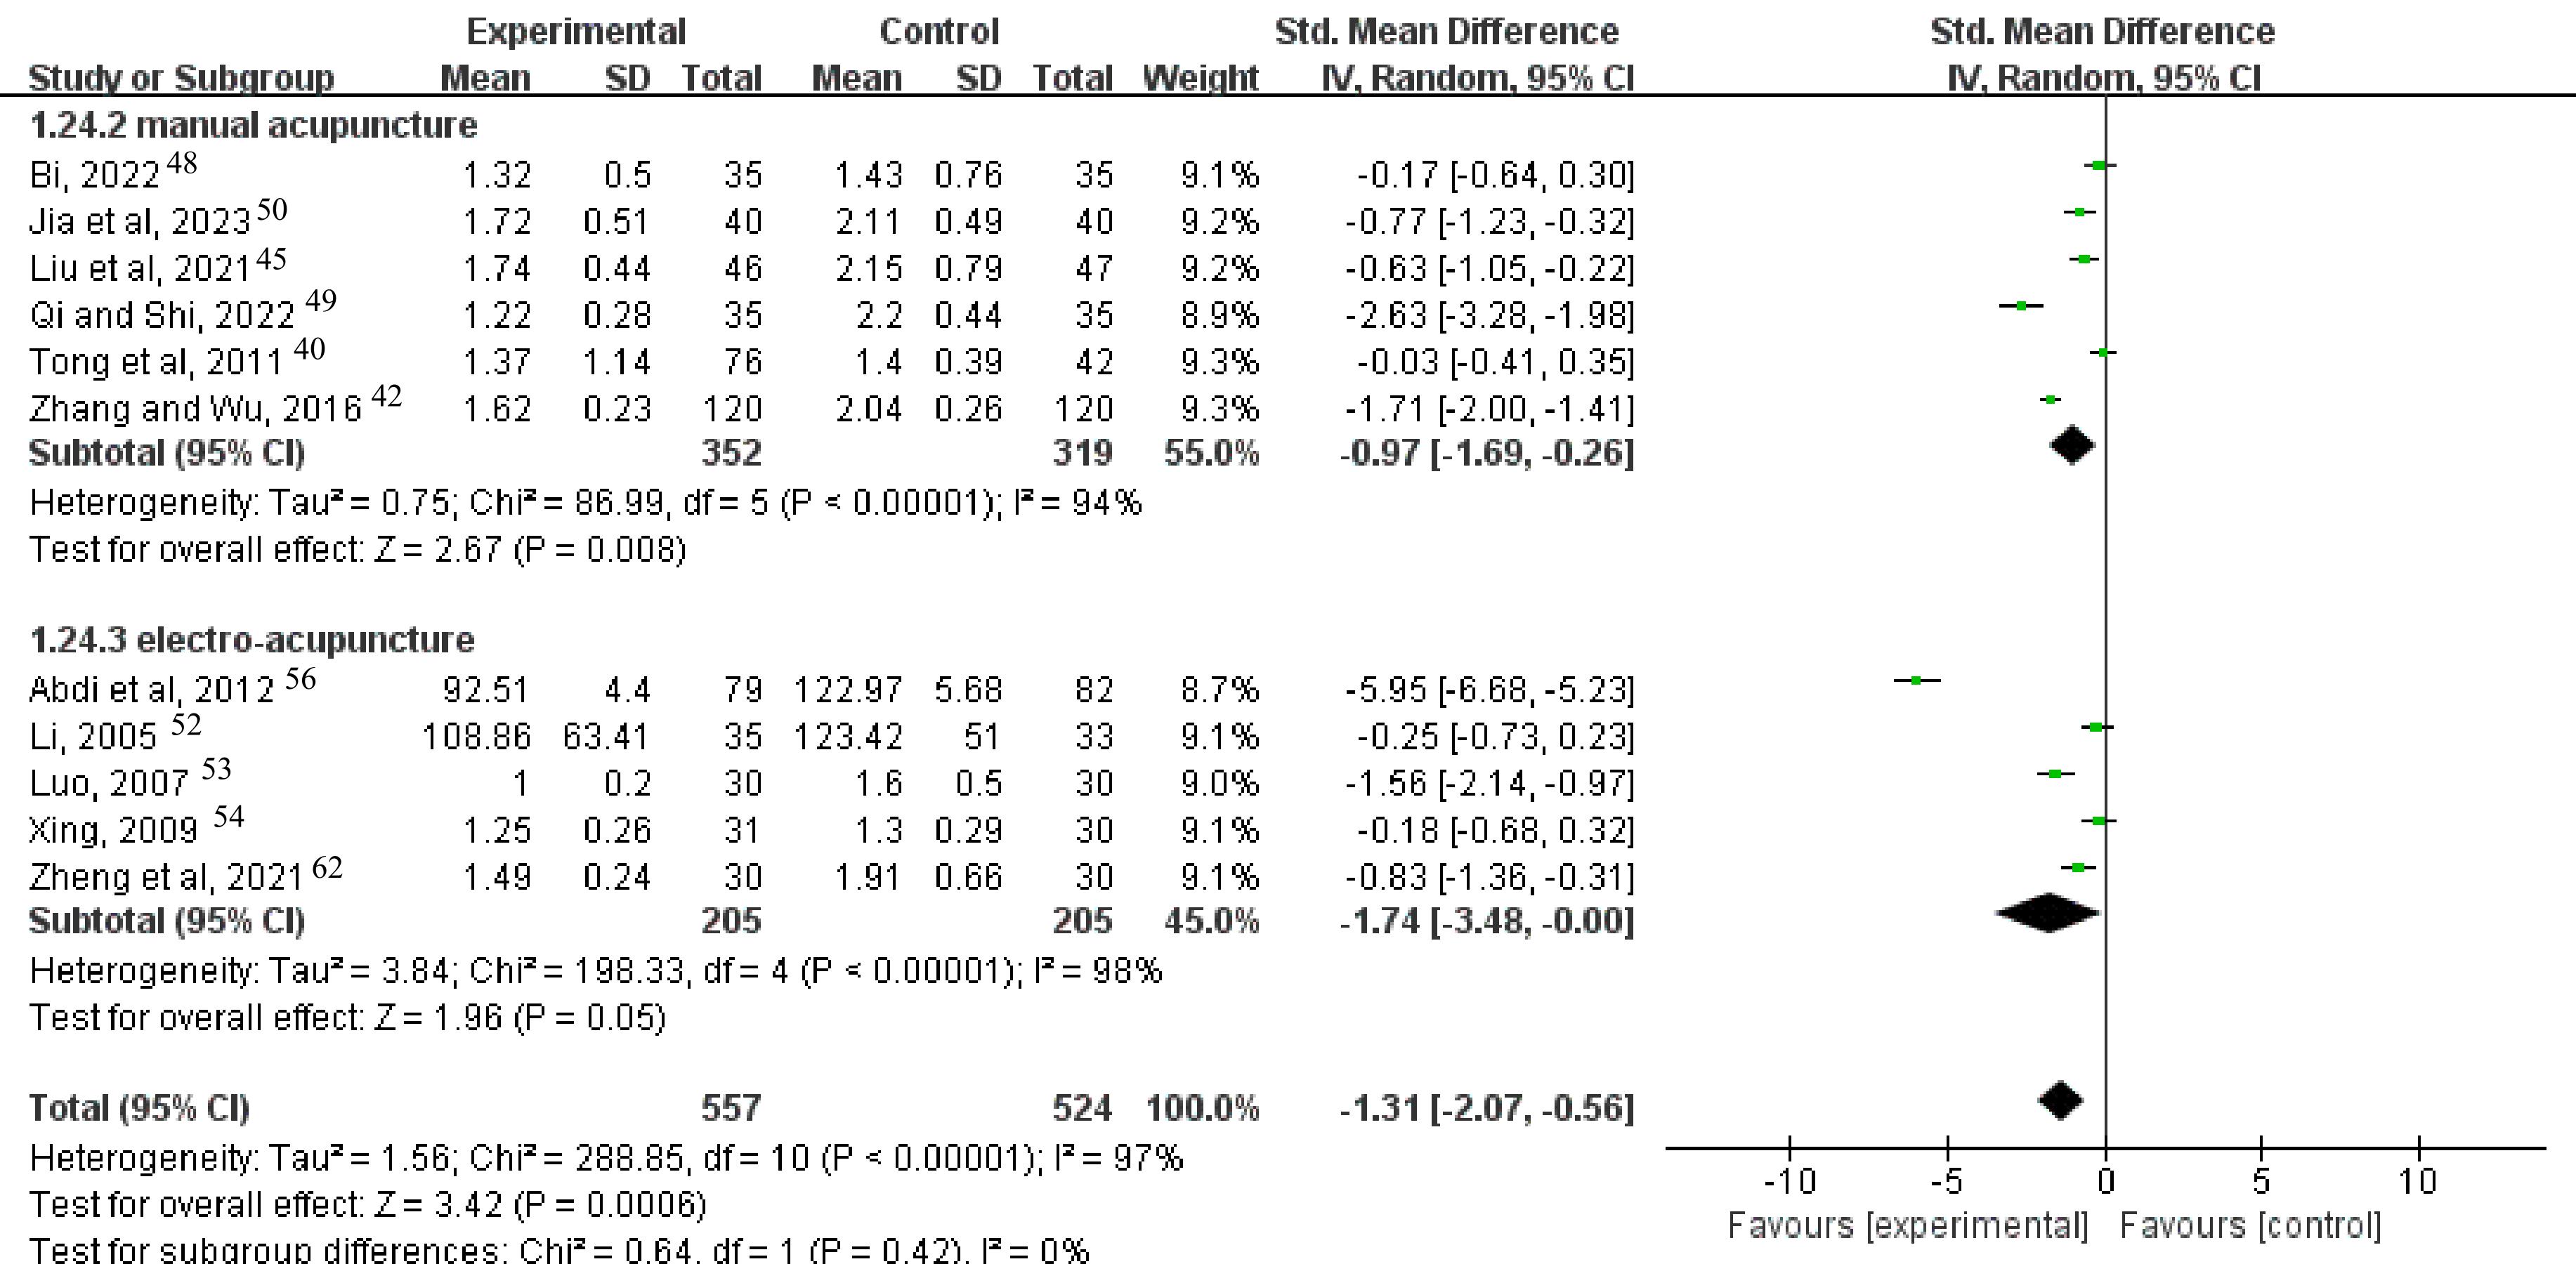


**Figure S7** Subgroup analysis of different acupuncture interventions on TG.


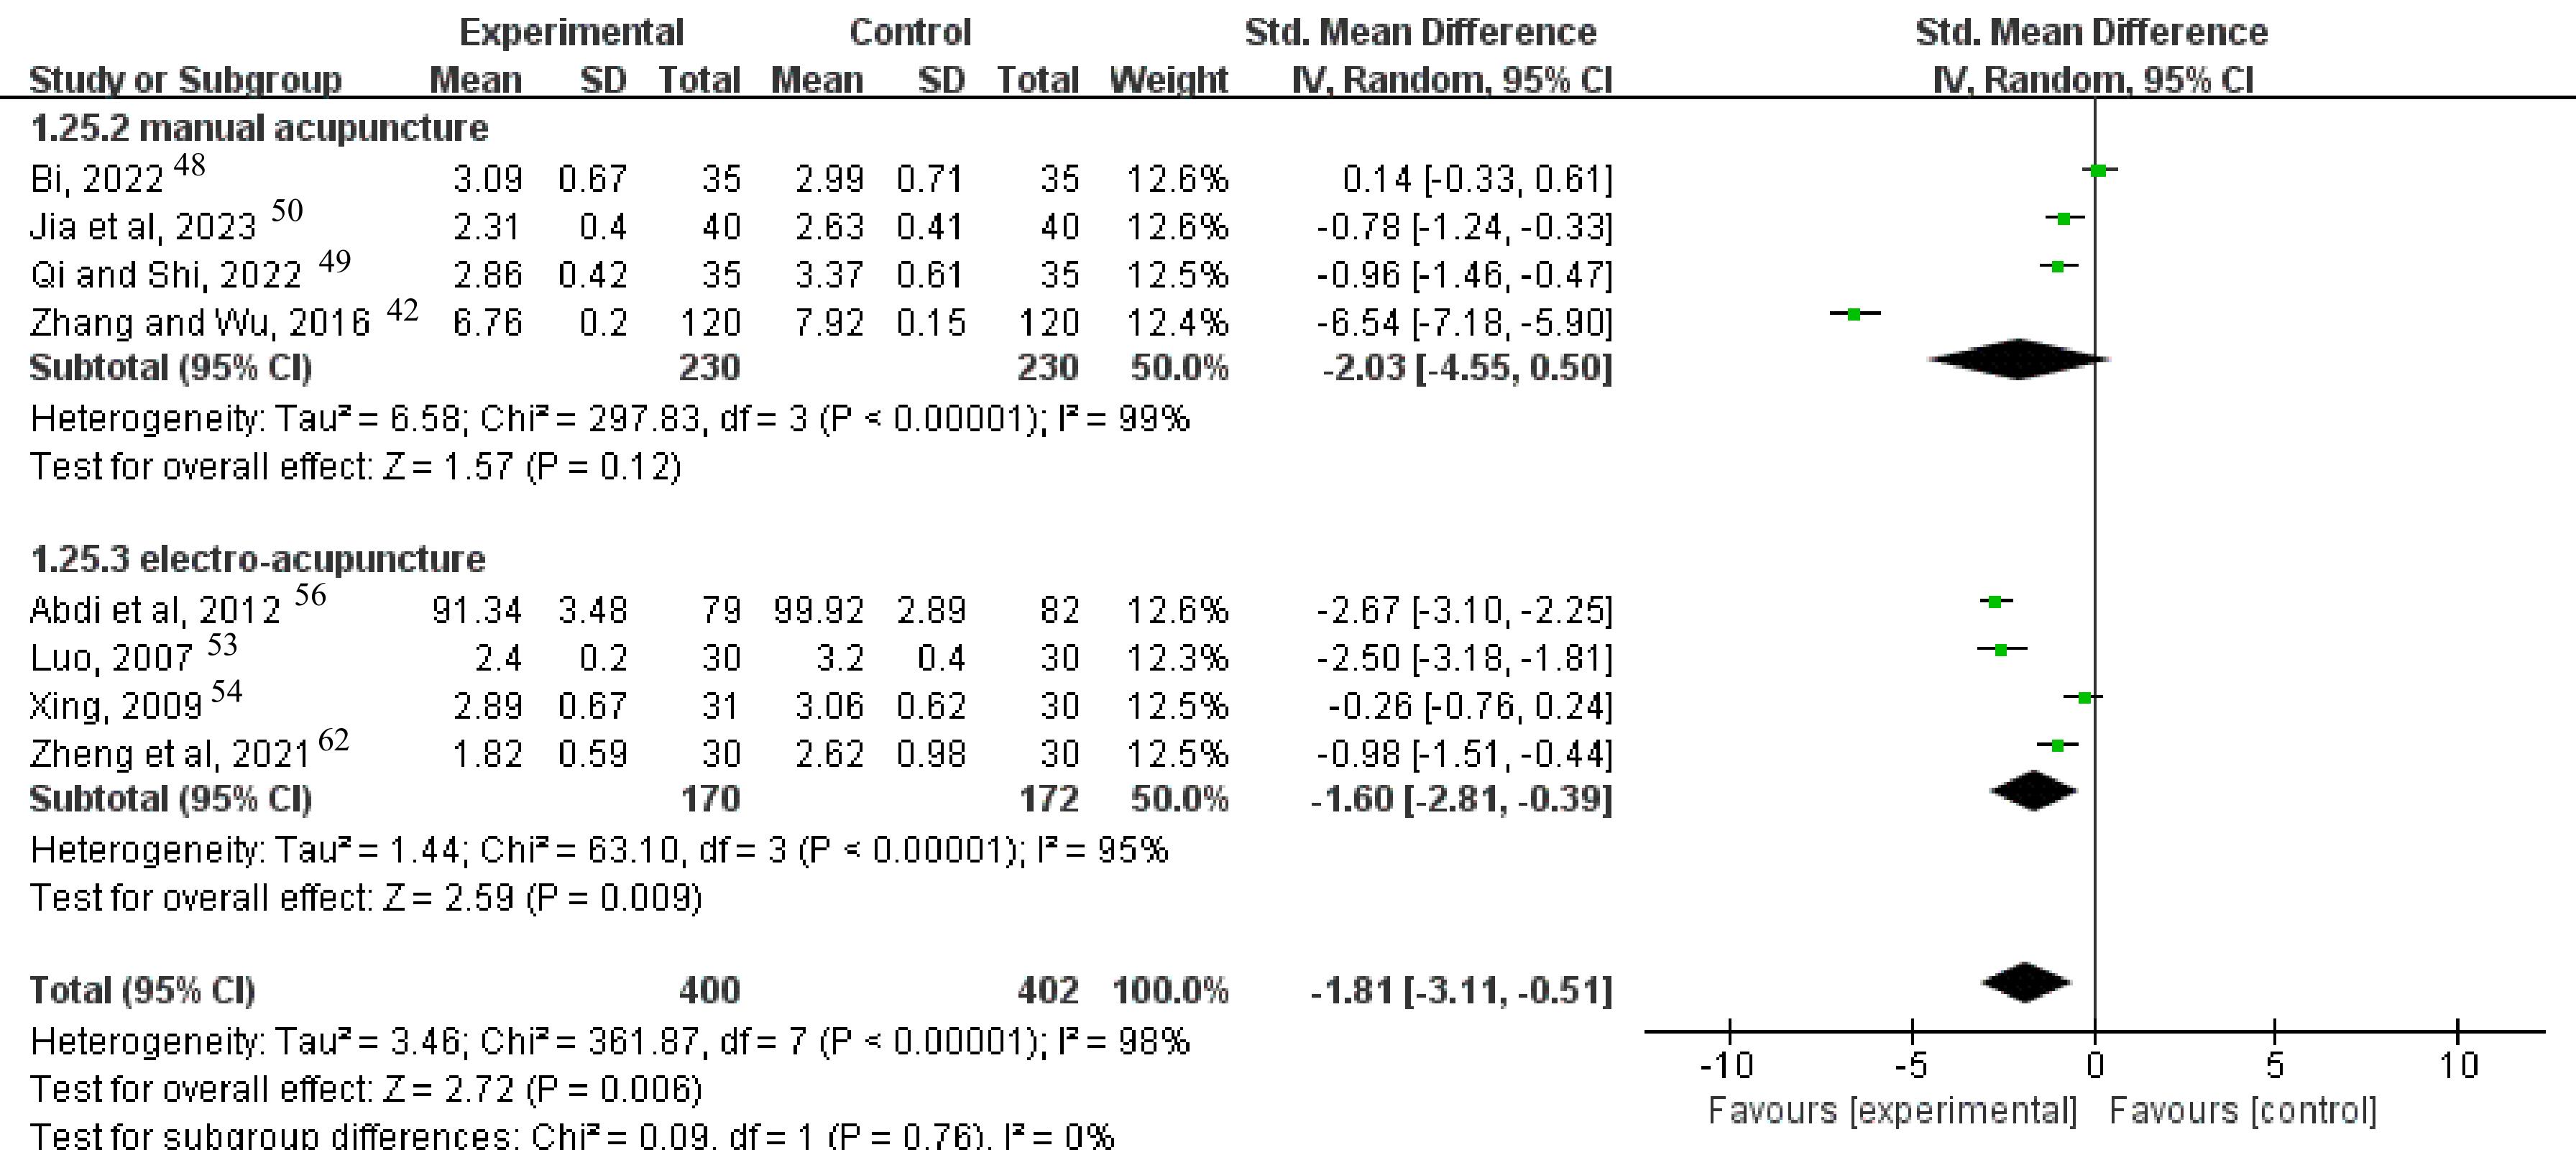


**Figure S8** Subgroup analysis of different acupuncture interventions on LDL-C.


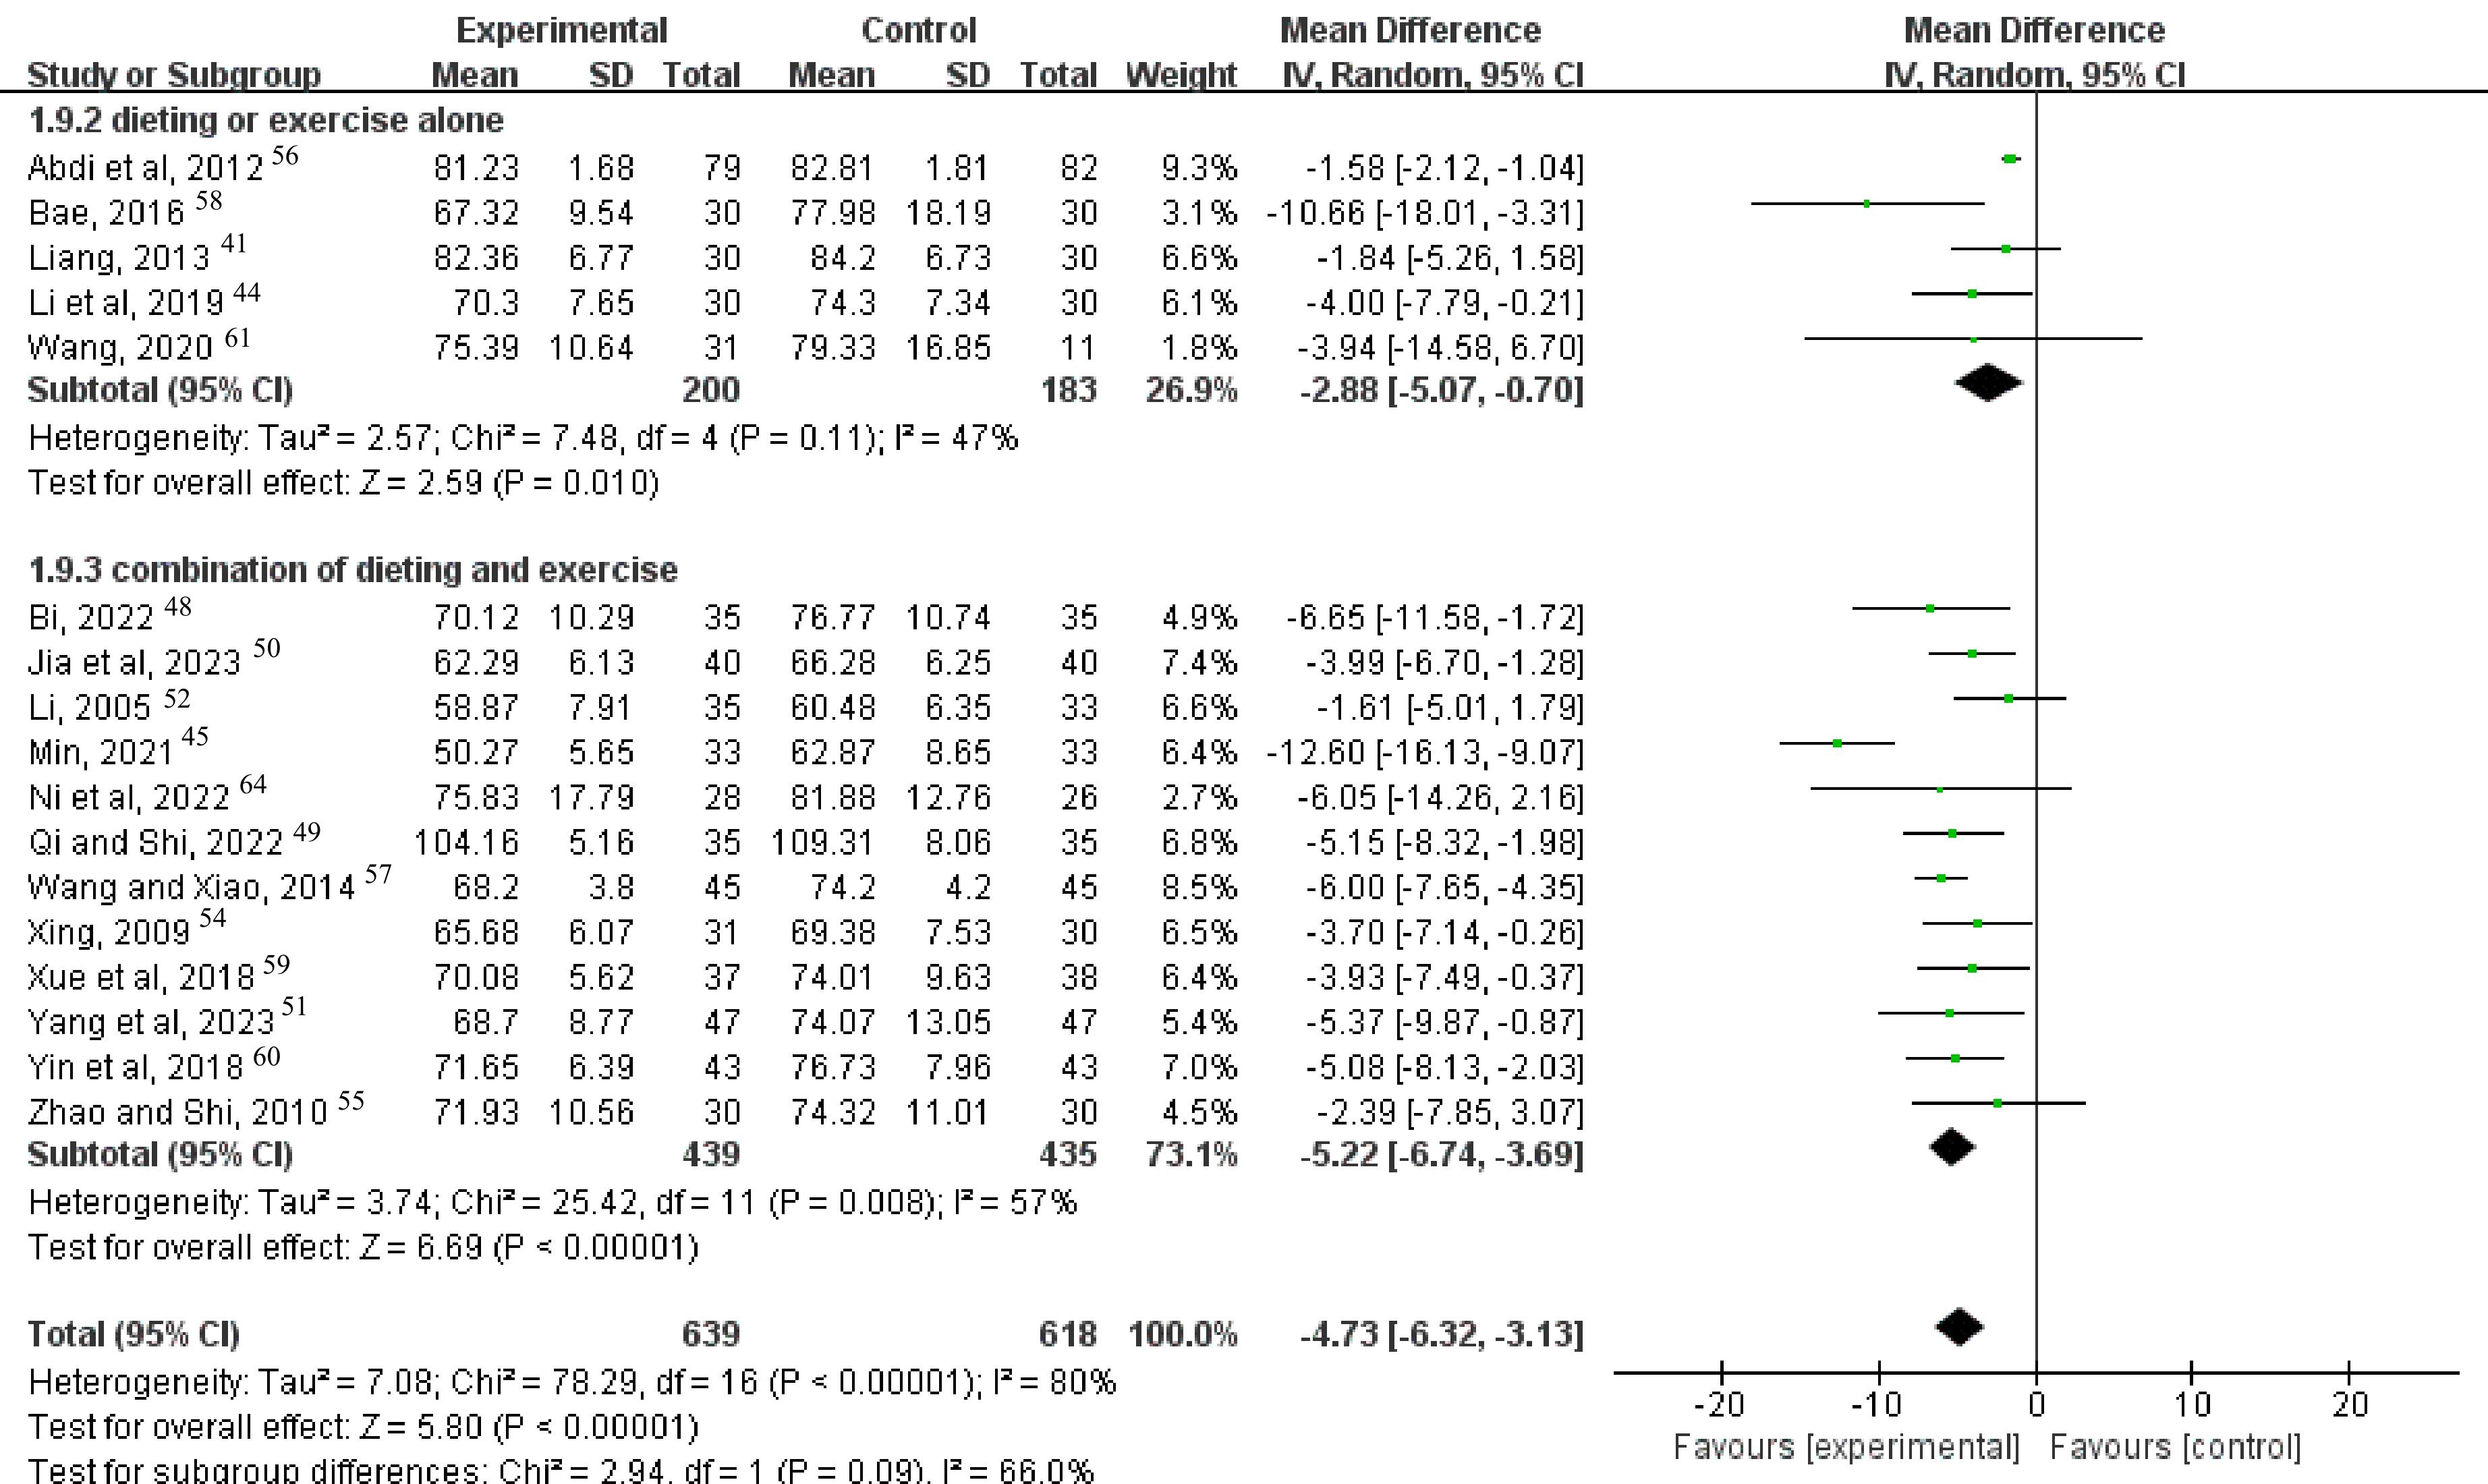


**Figure S9** Subgroup analysis of different lifestyle interventions on body weight.


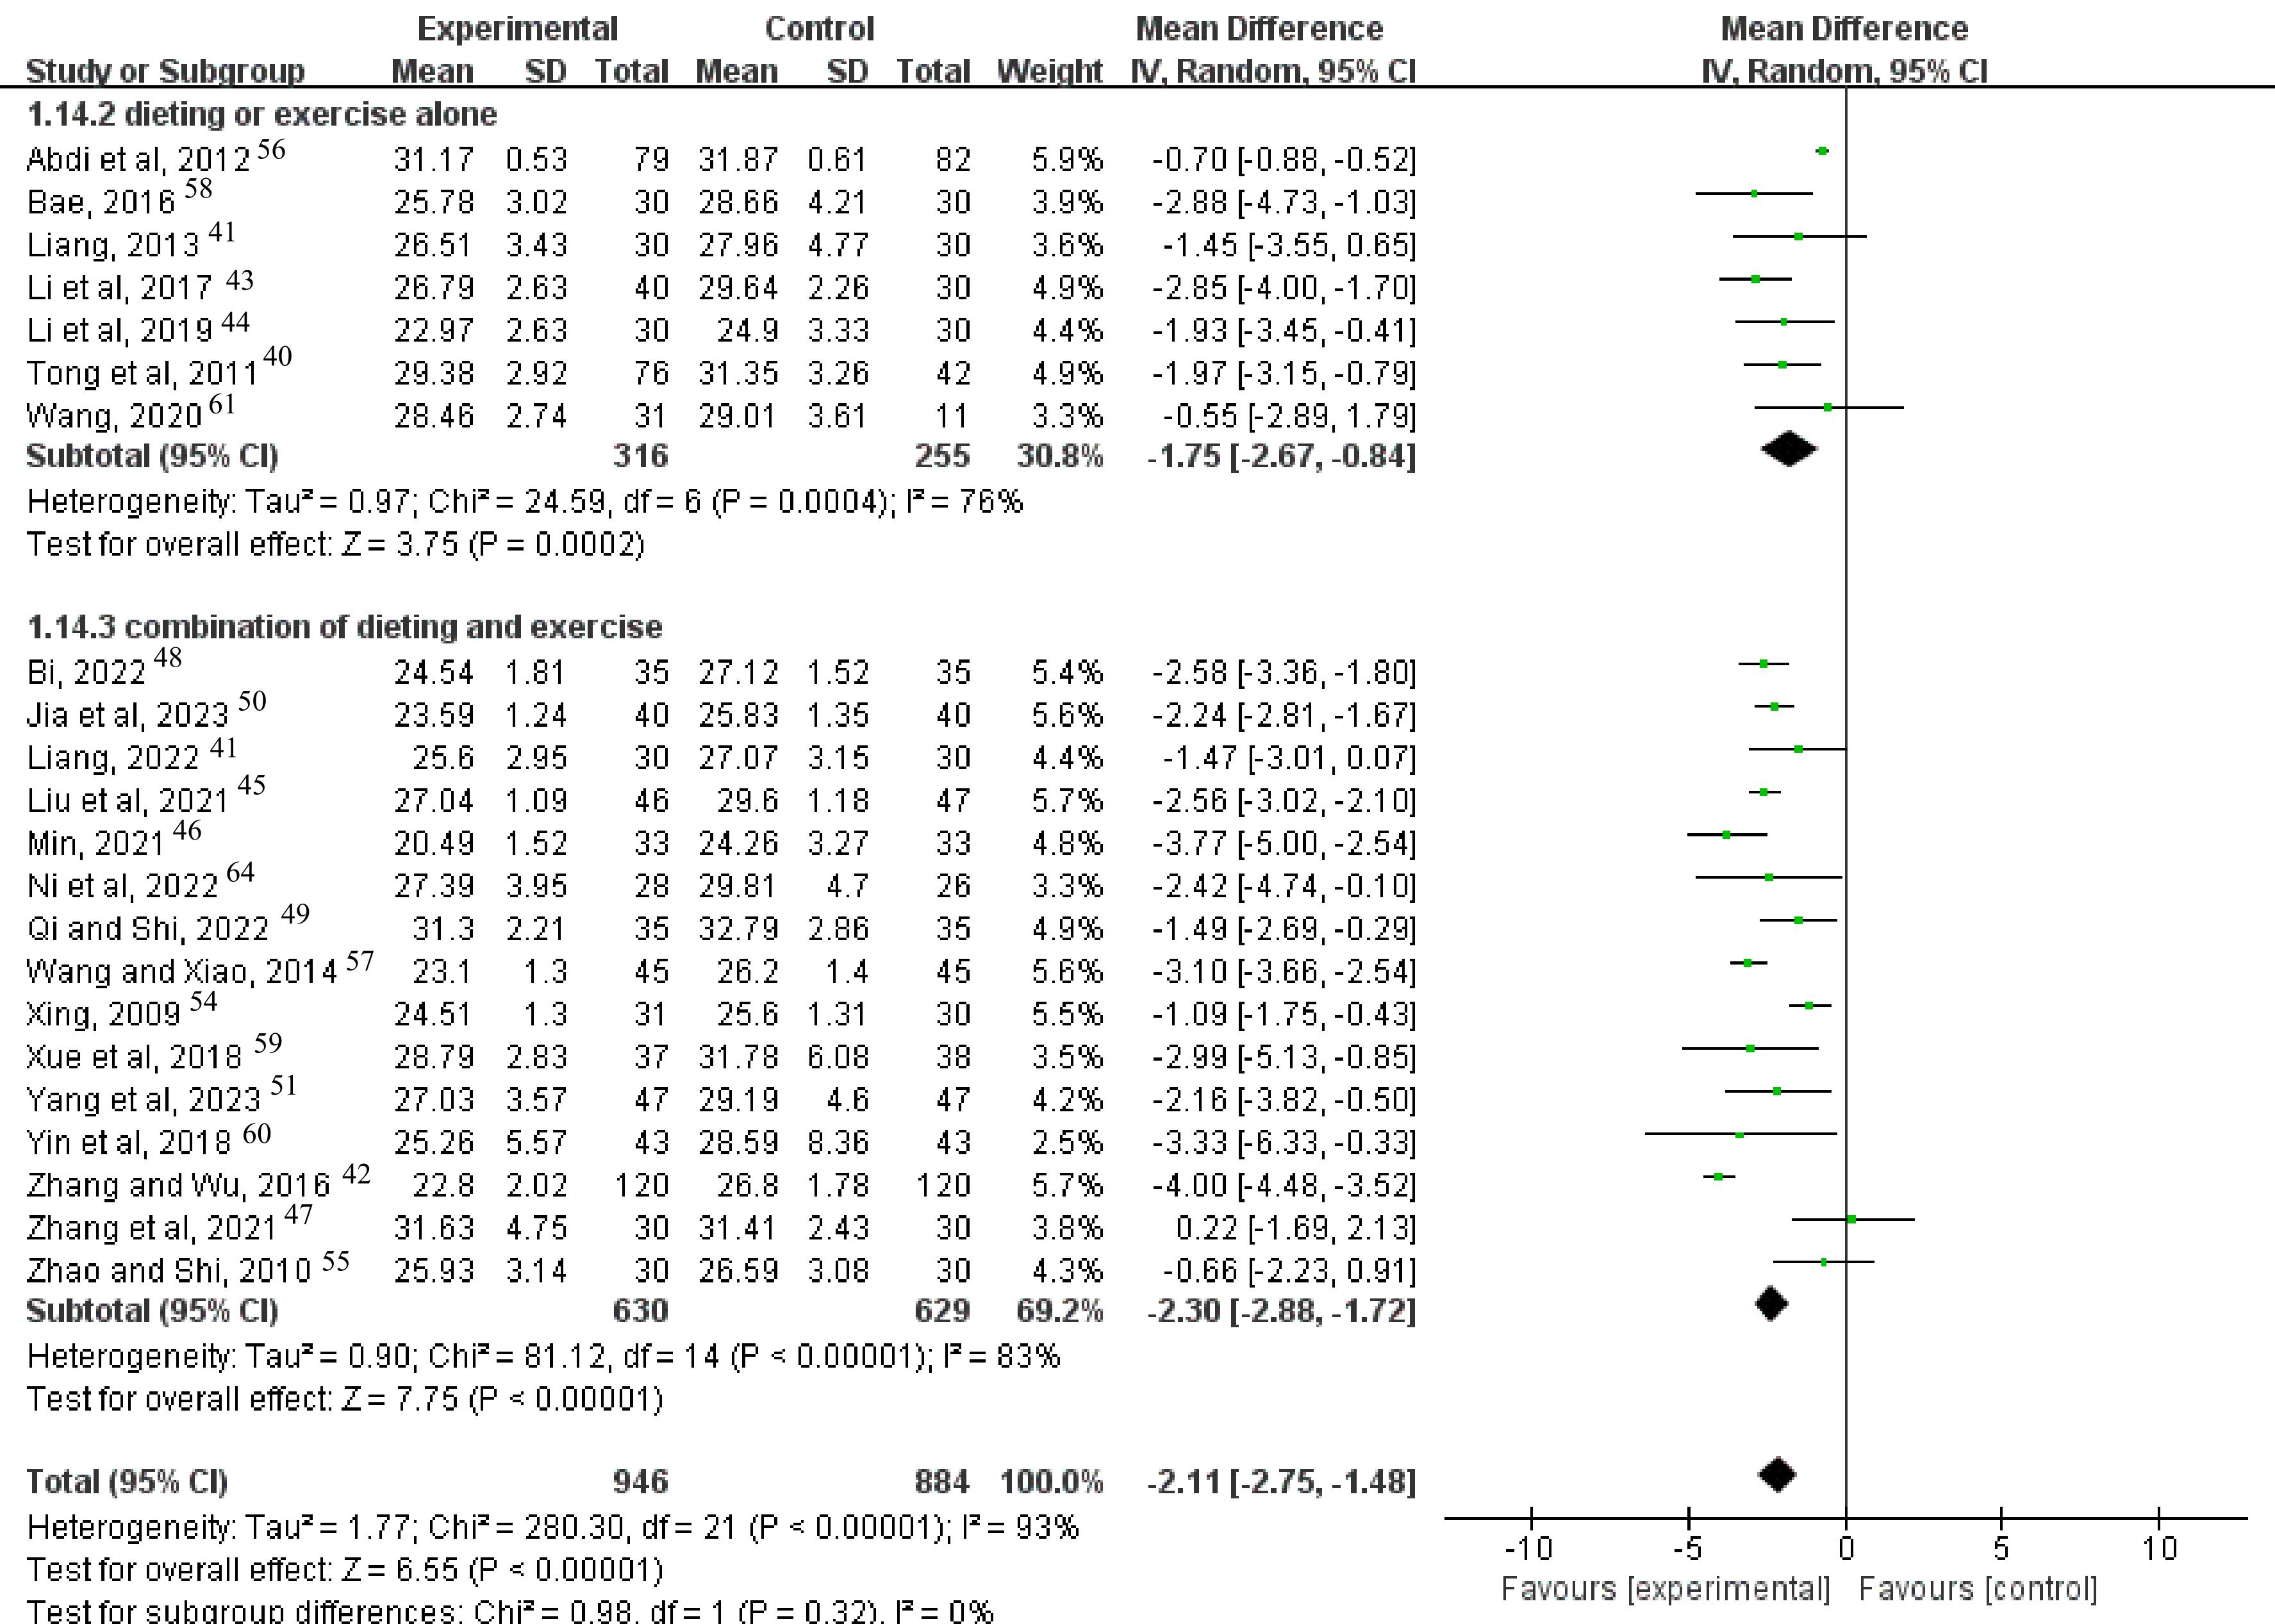


**Figure S10** Subgroup analysis of different lifestyle interventions on BMI.


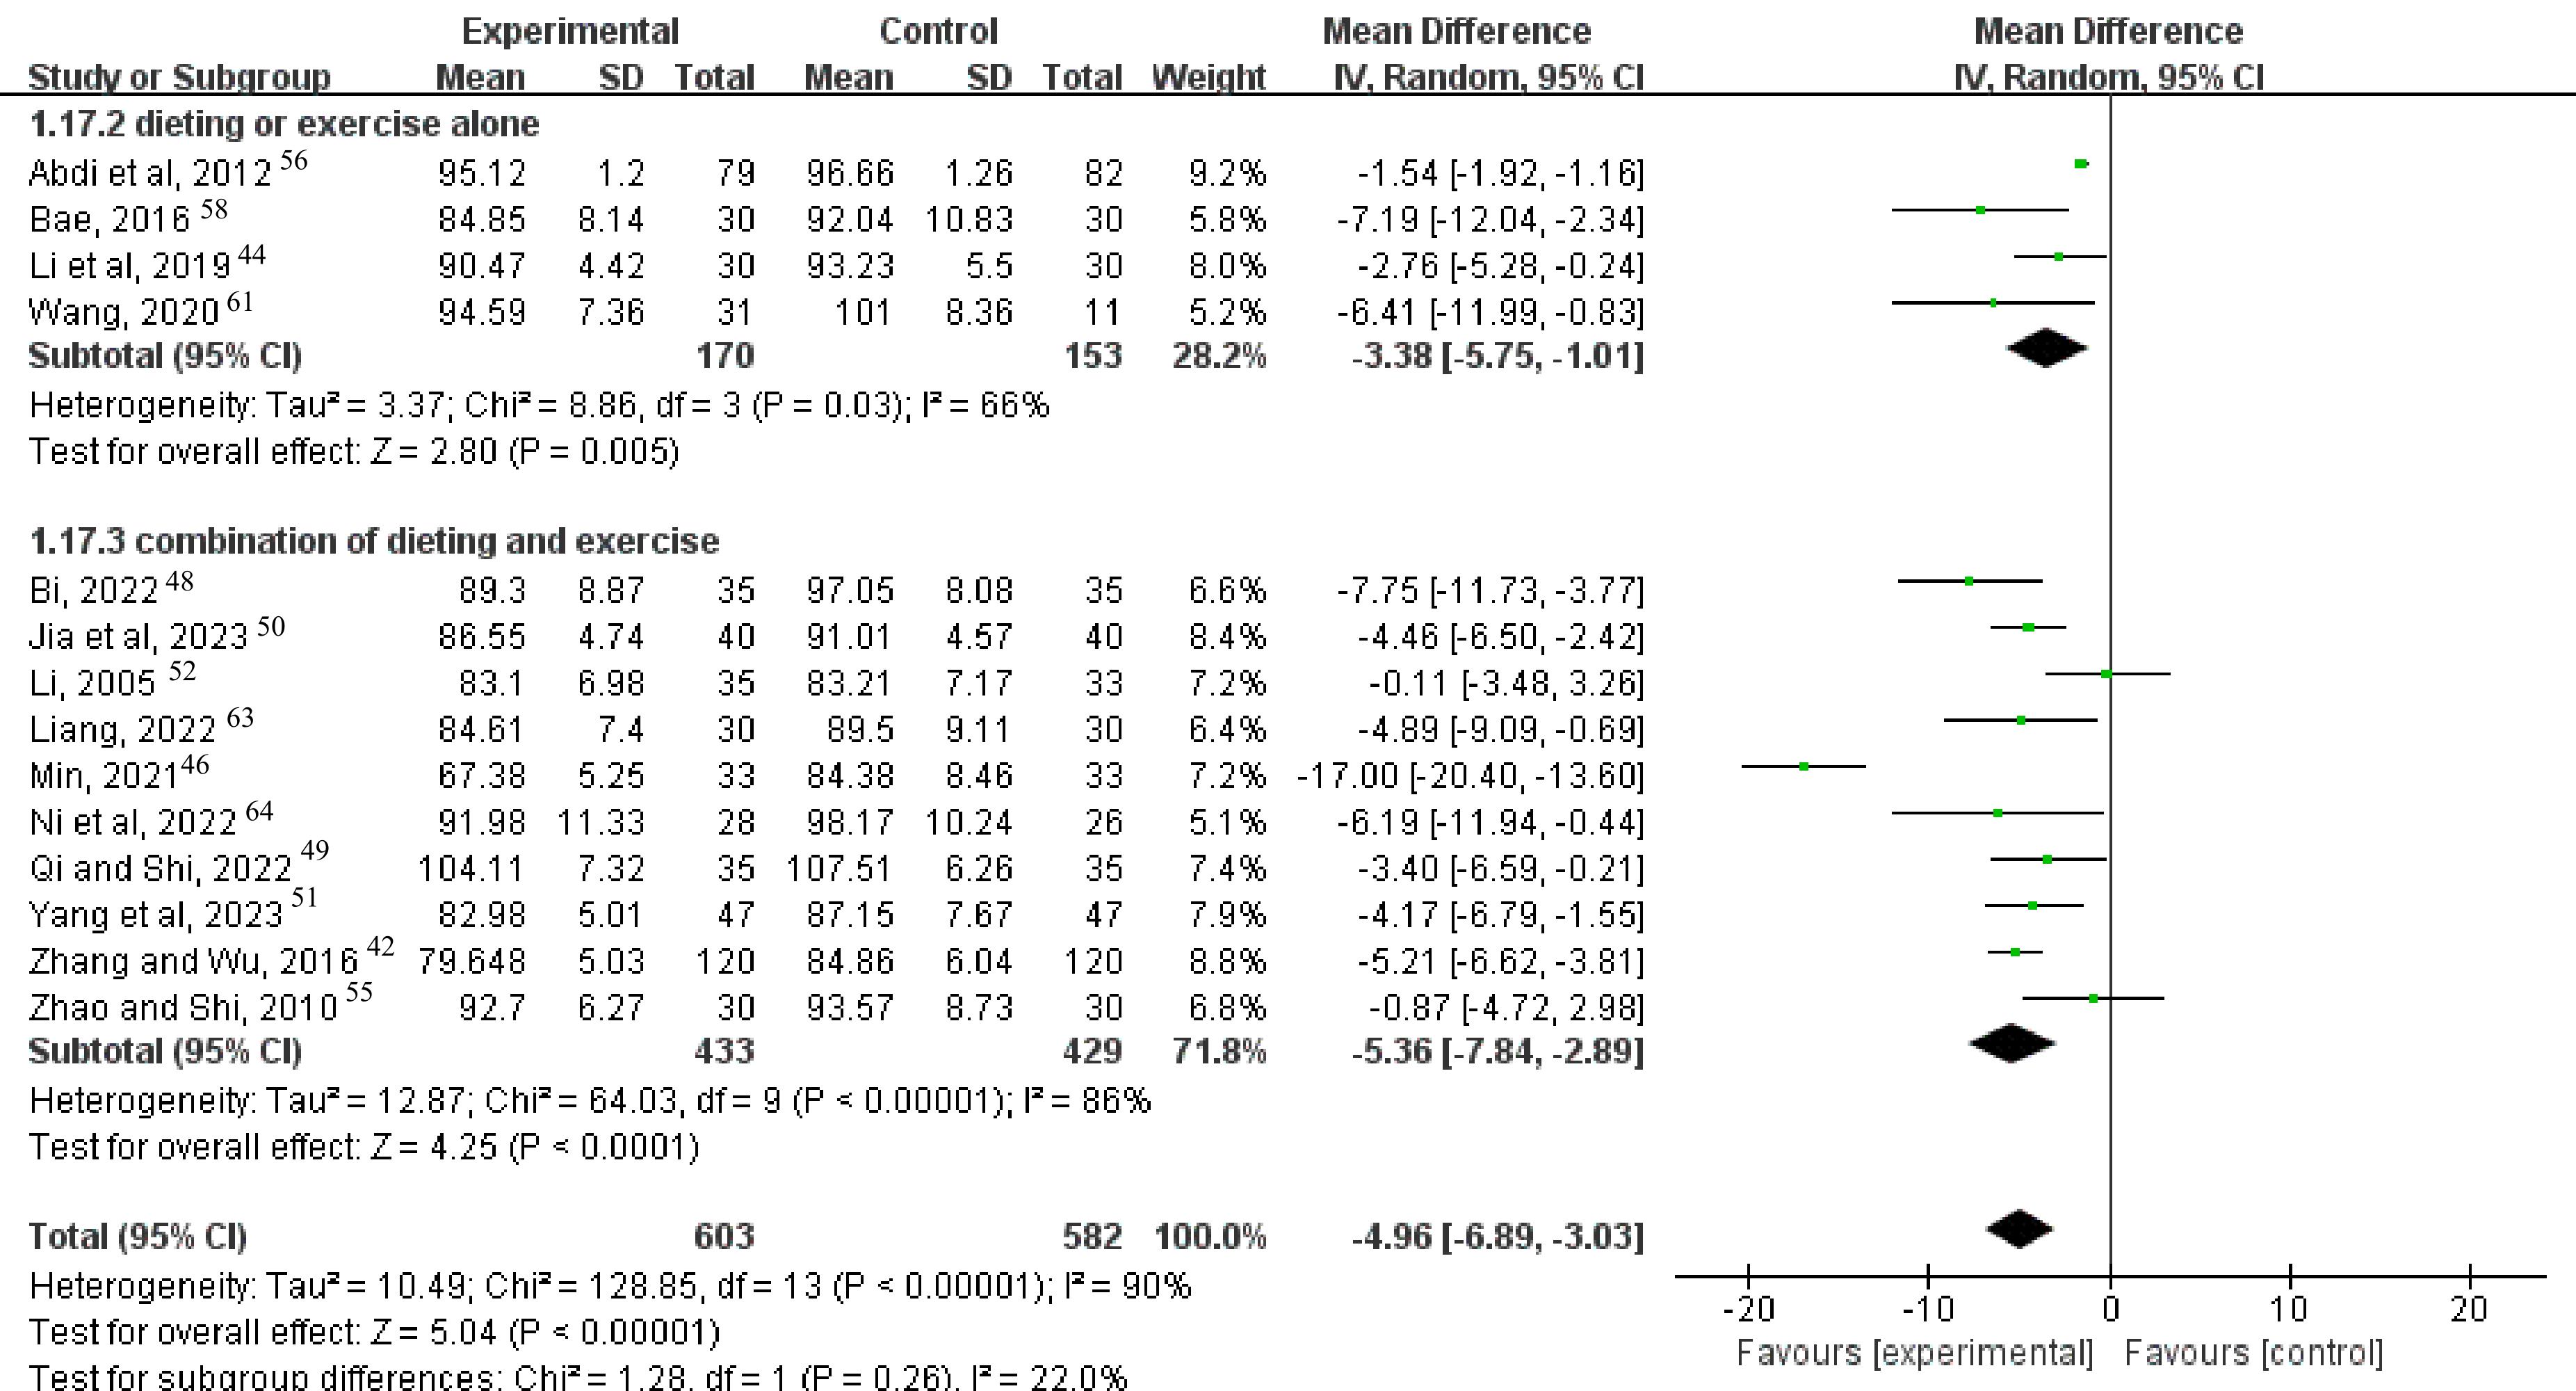


**Figure S11** Subgroup analysis of different lifestyle interventions on WC.


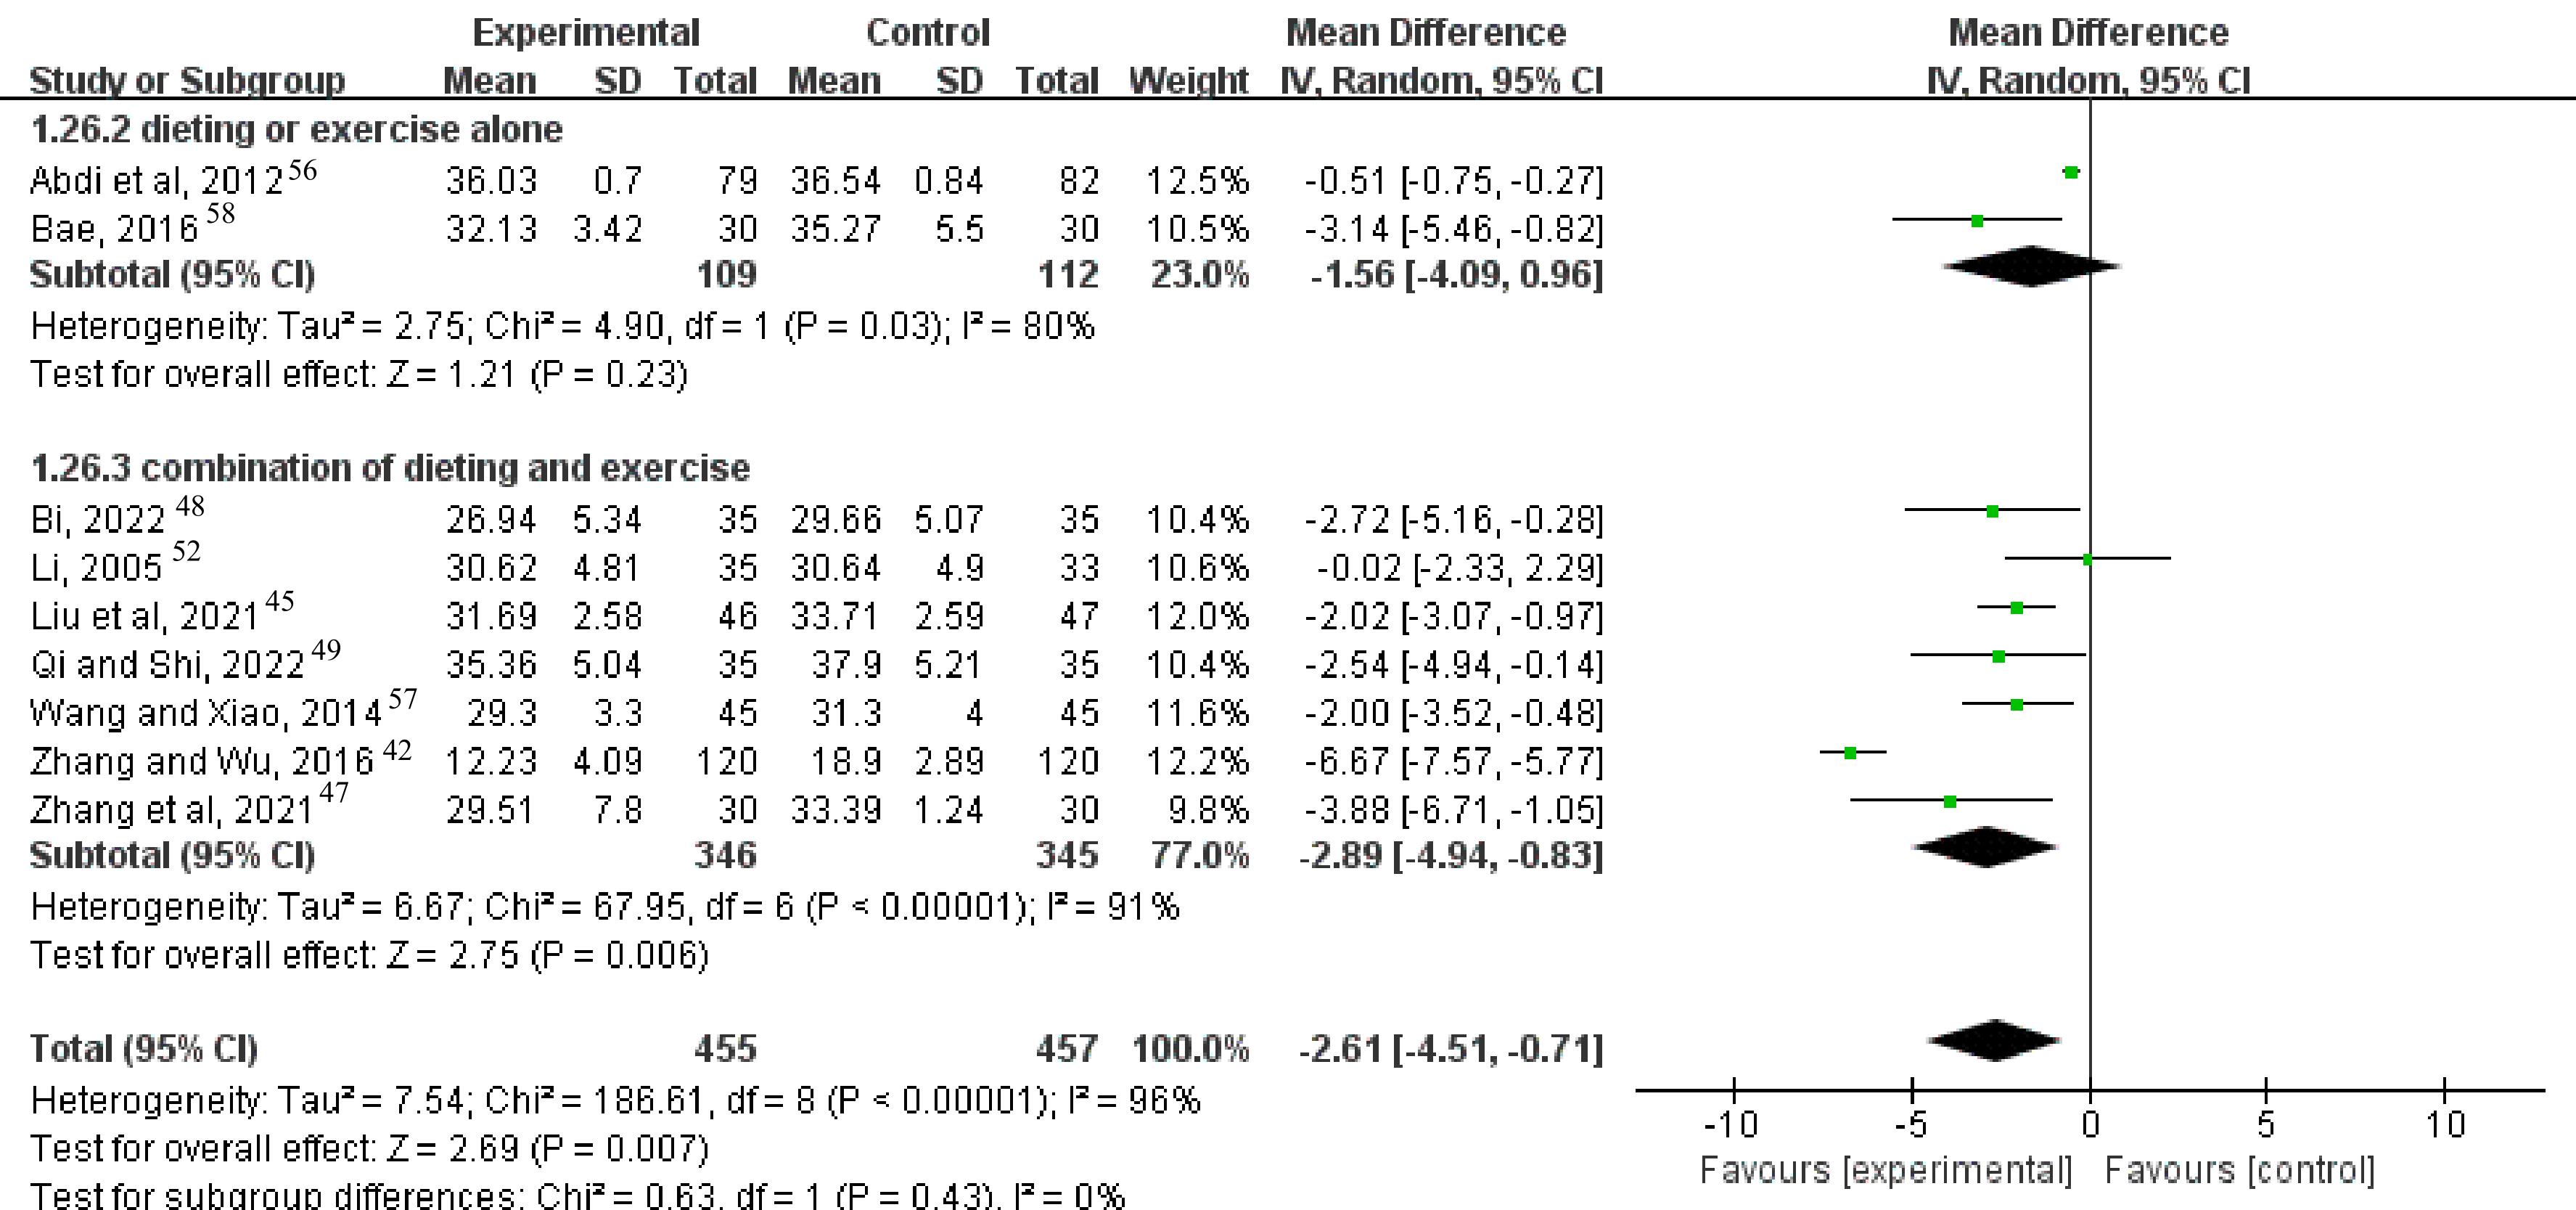


**Figure S12** Subgroup analysis of different lifestyle interventions on BF %.


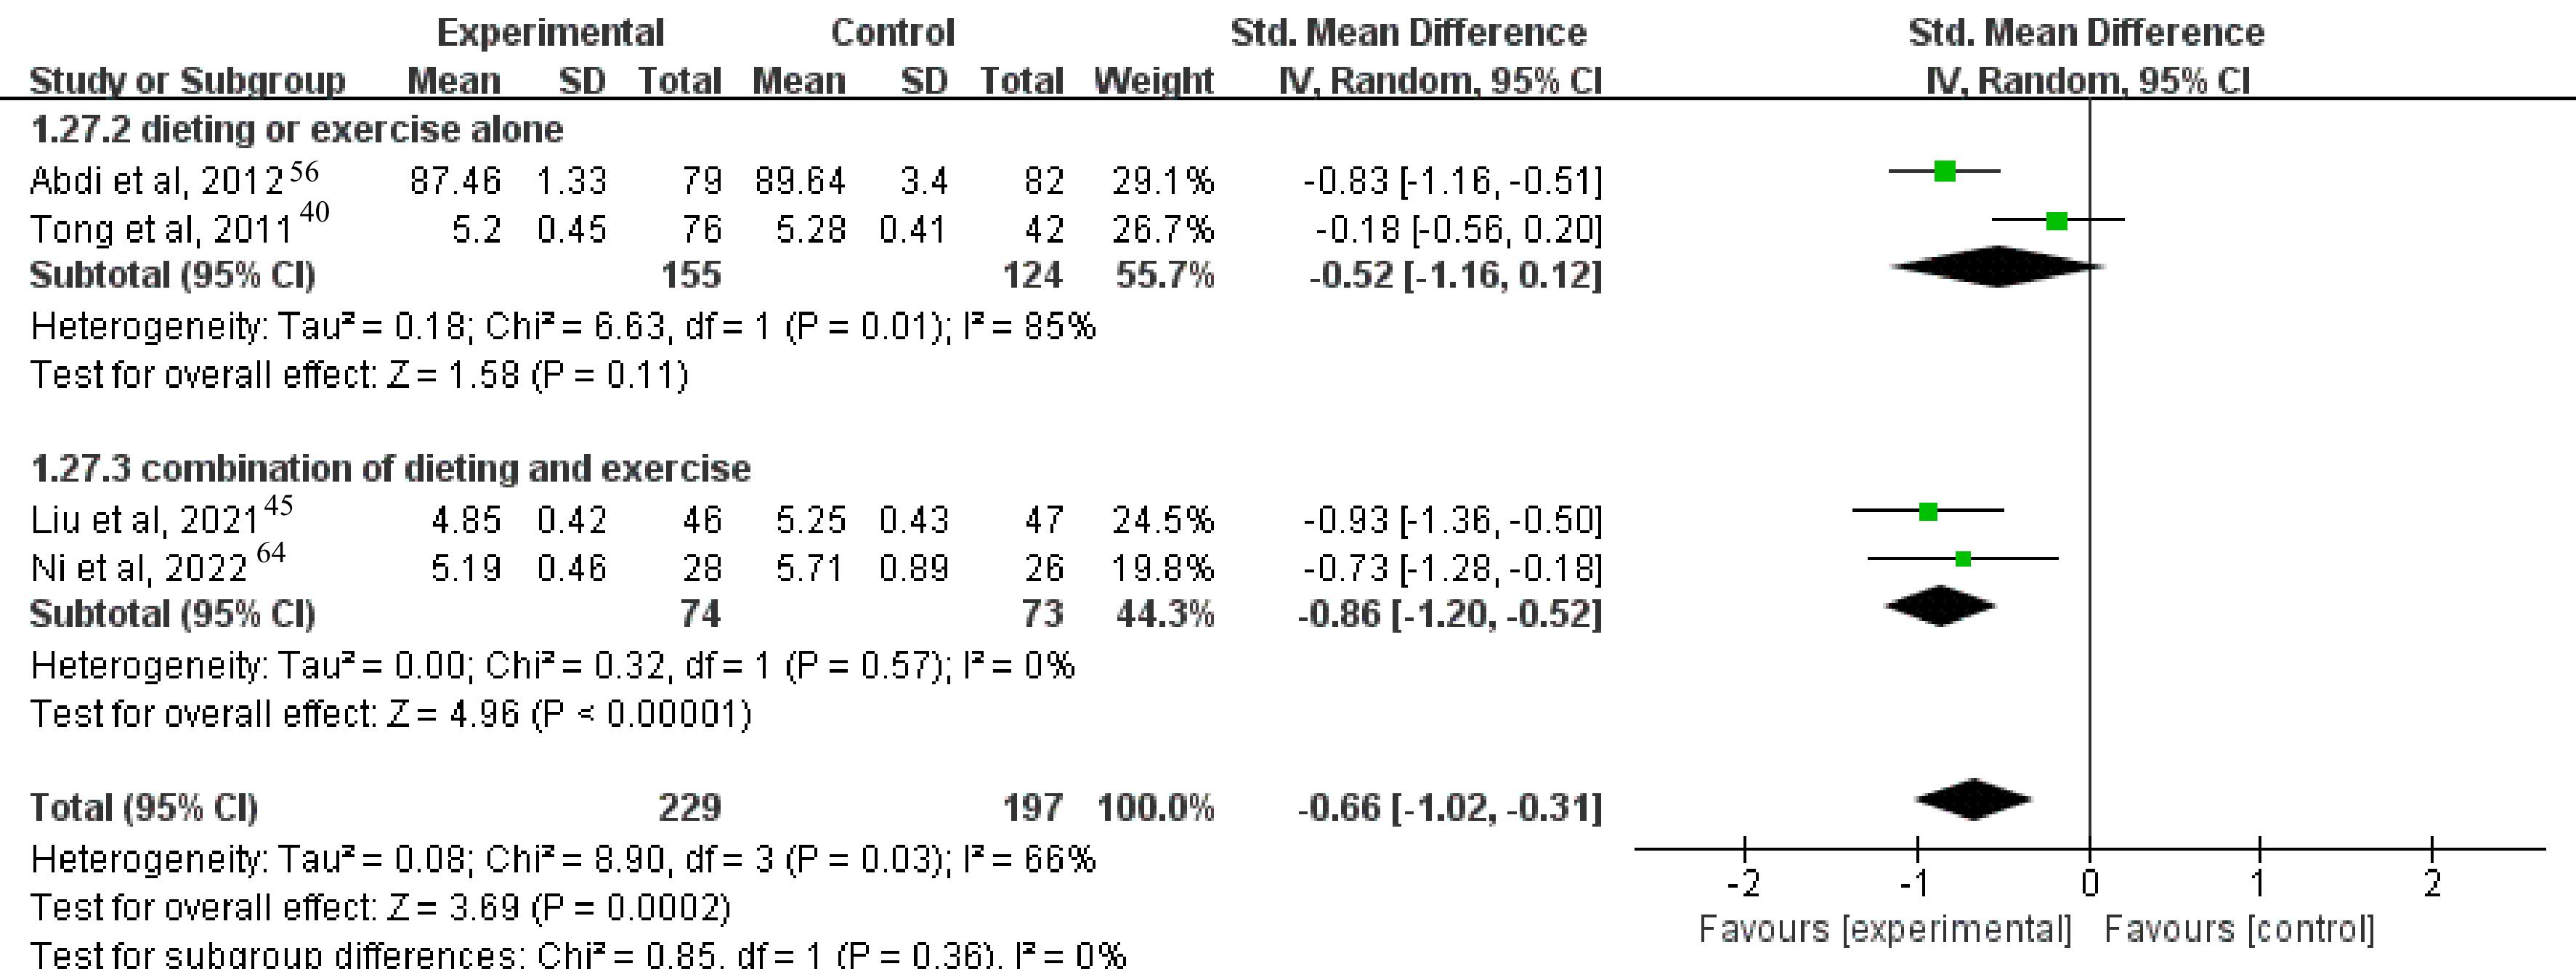


**Figure S13** Subgroup analysis of different lifestyle interventions on FPG.


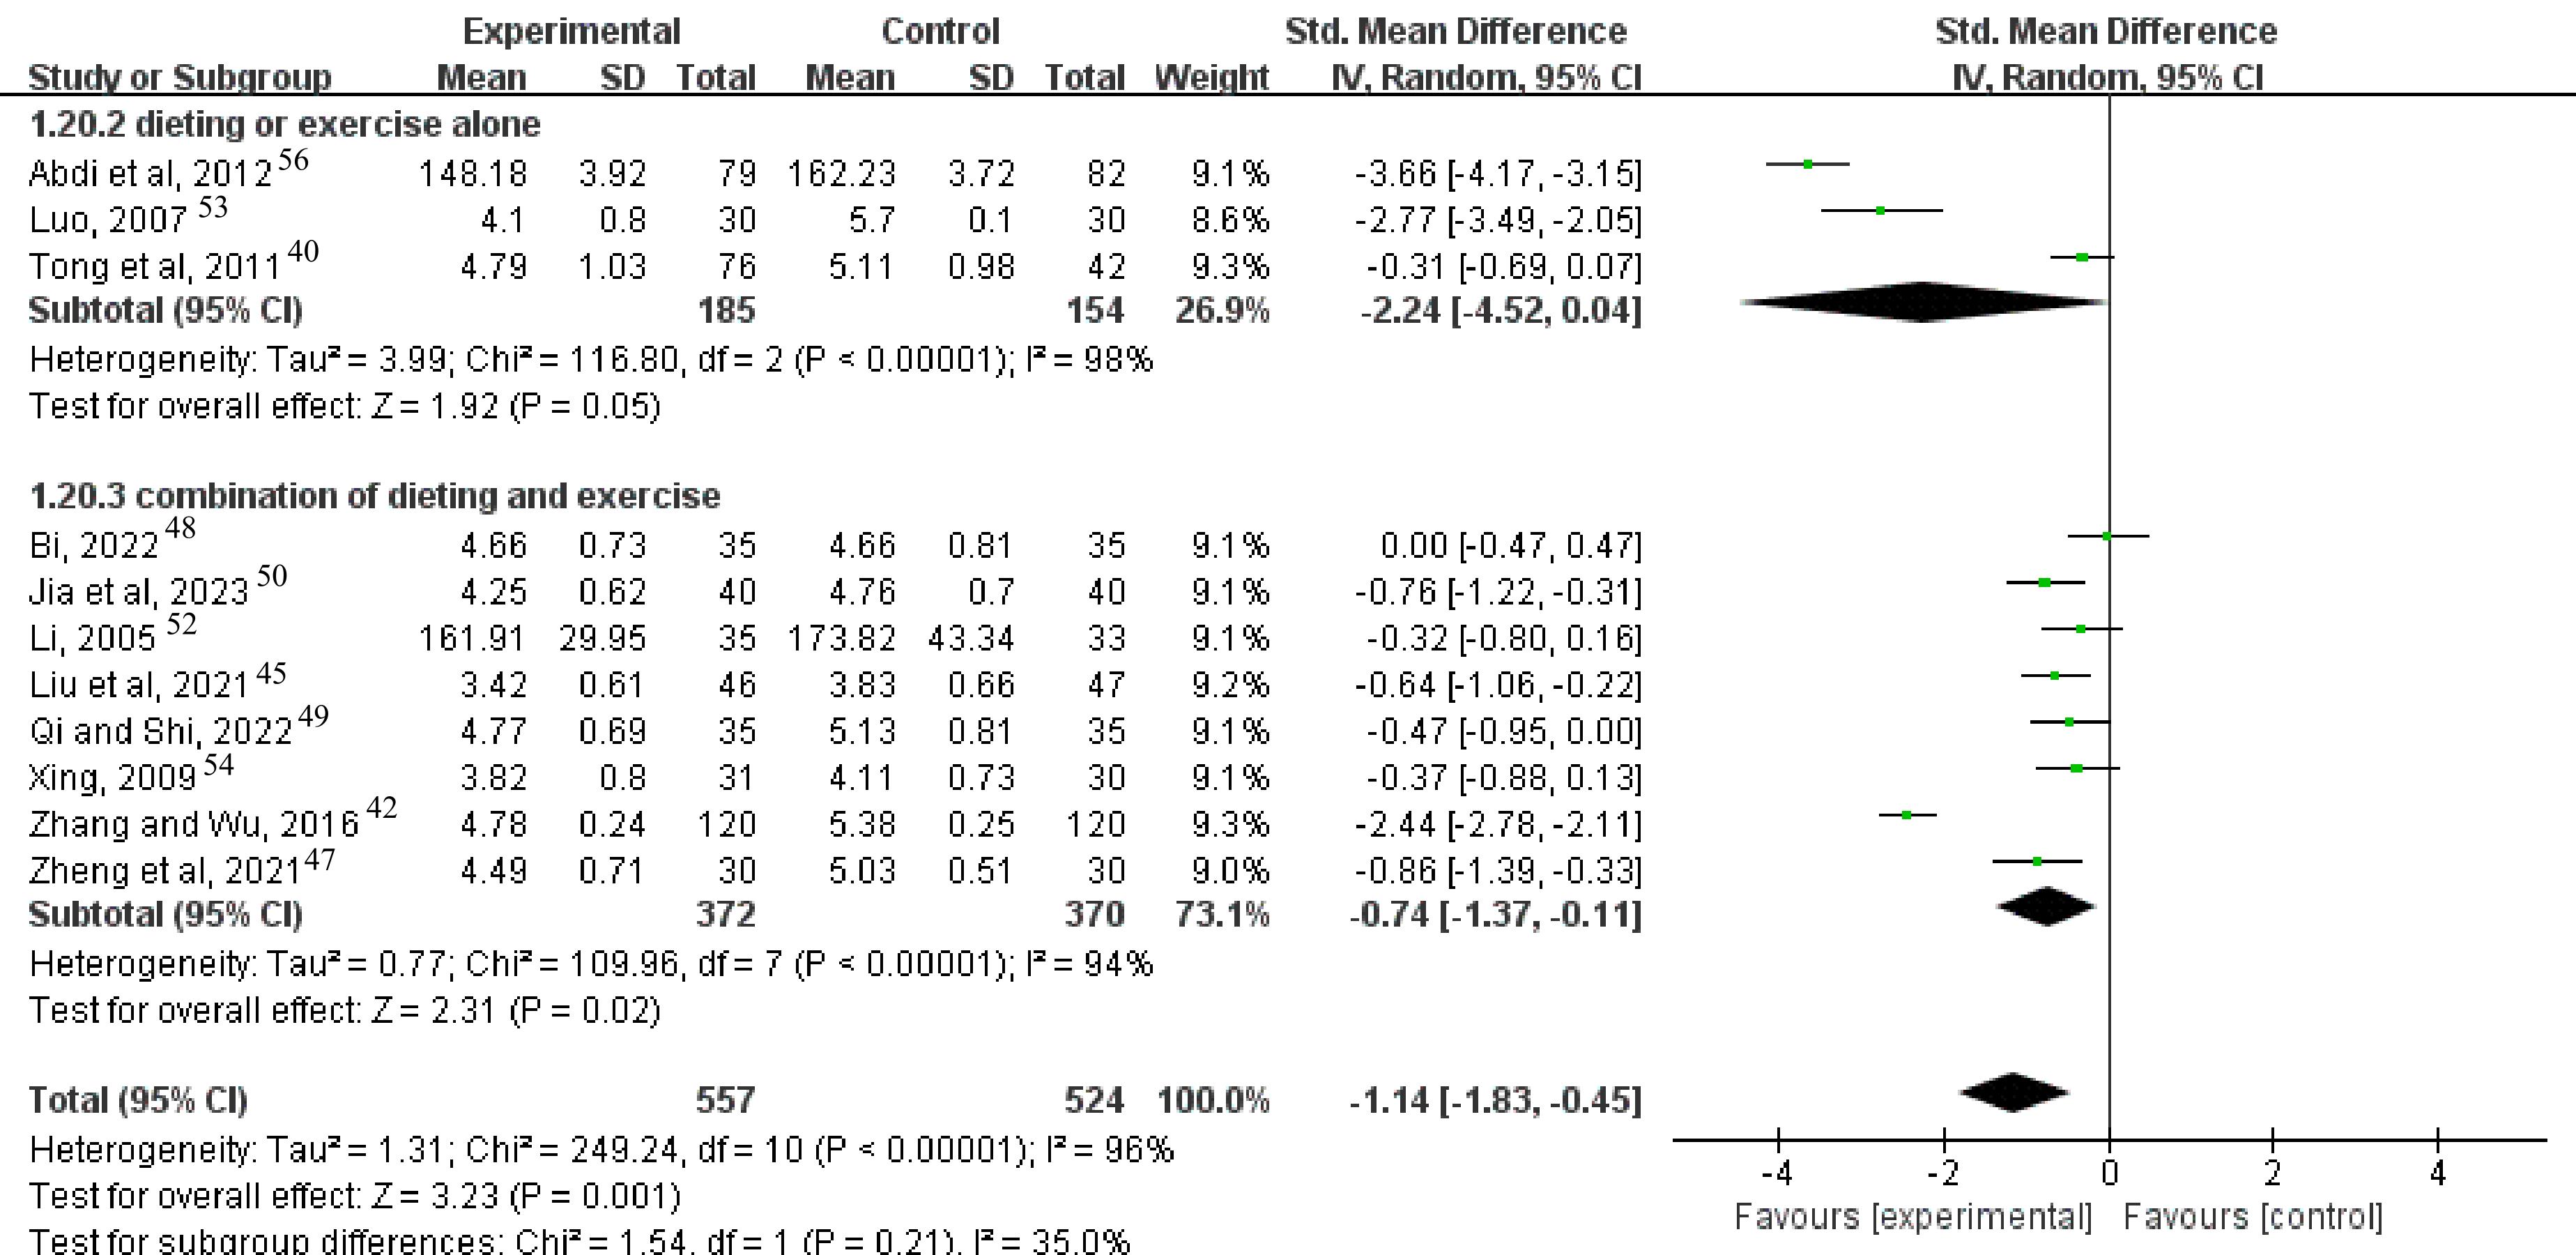


**Figure S14** Subgroup analysis of different lifestyle interventions on TC.


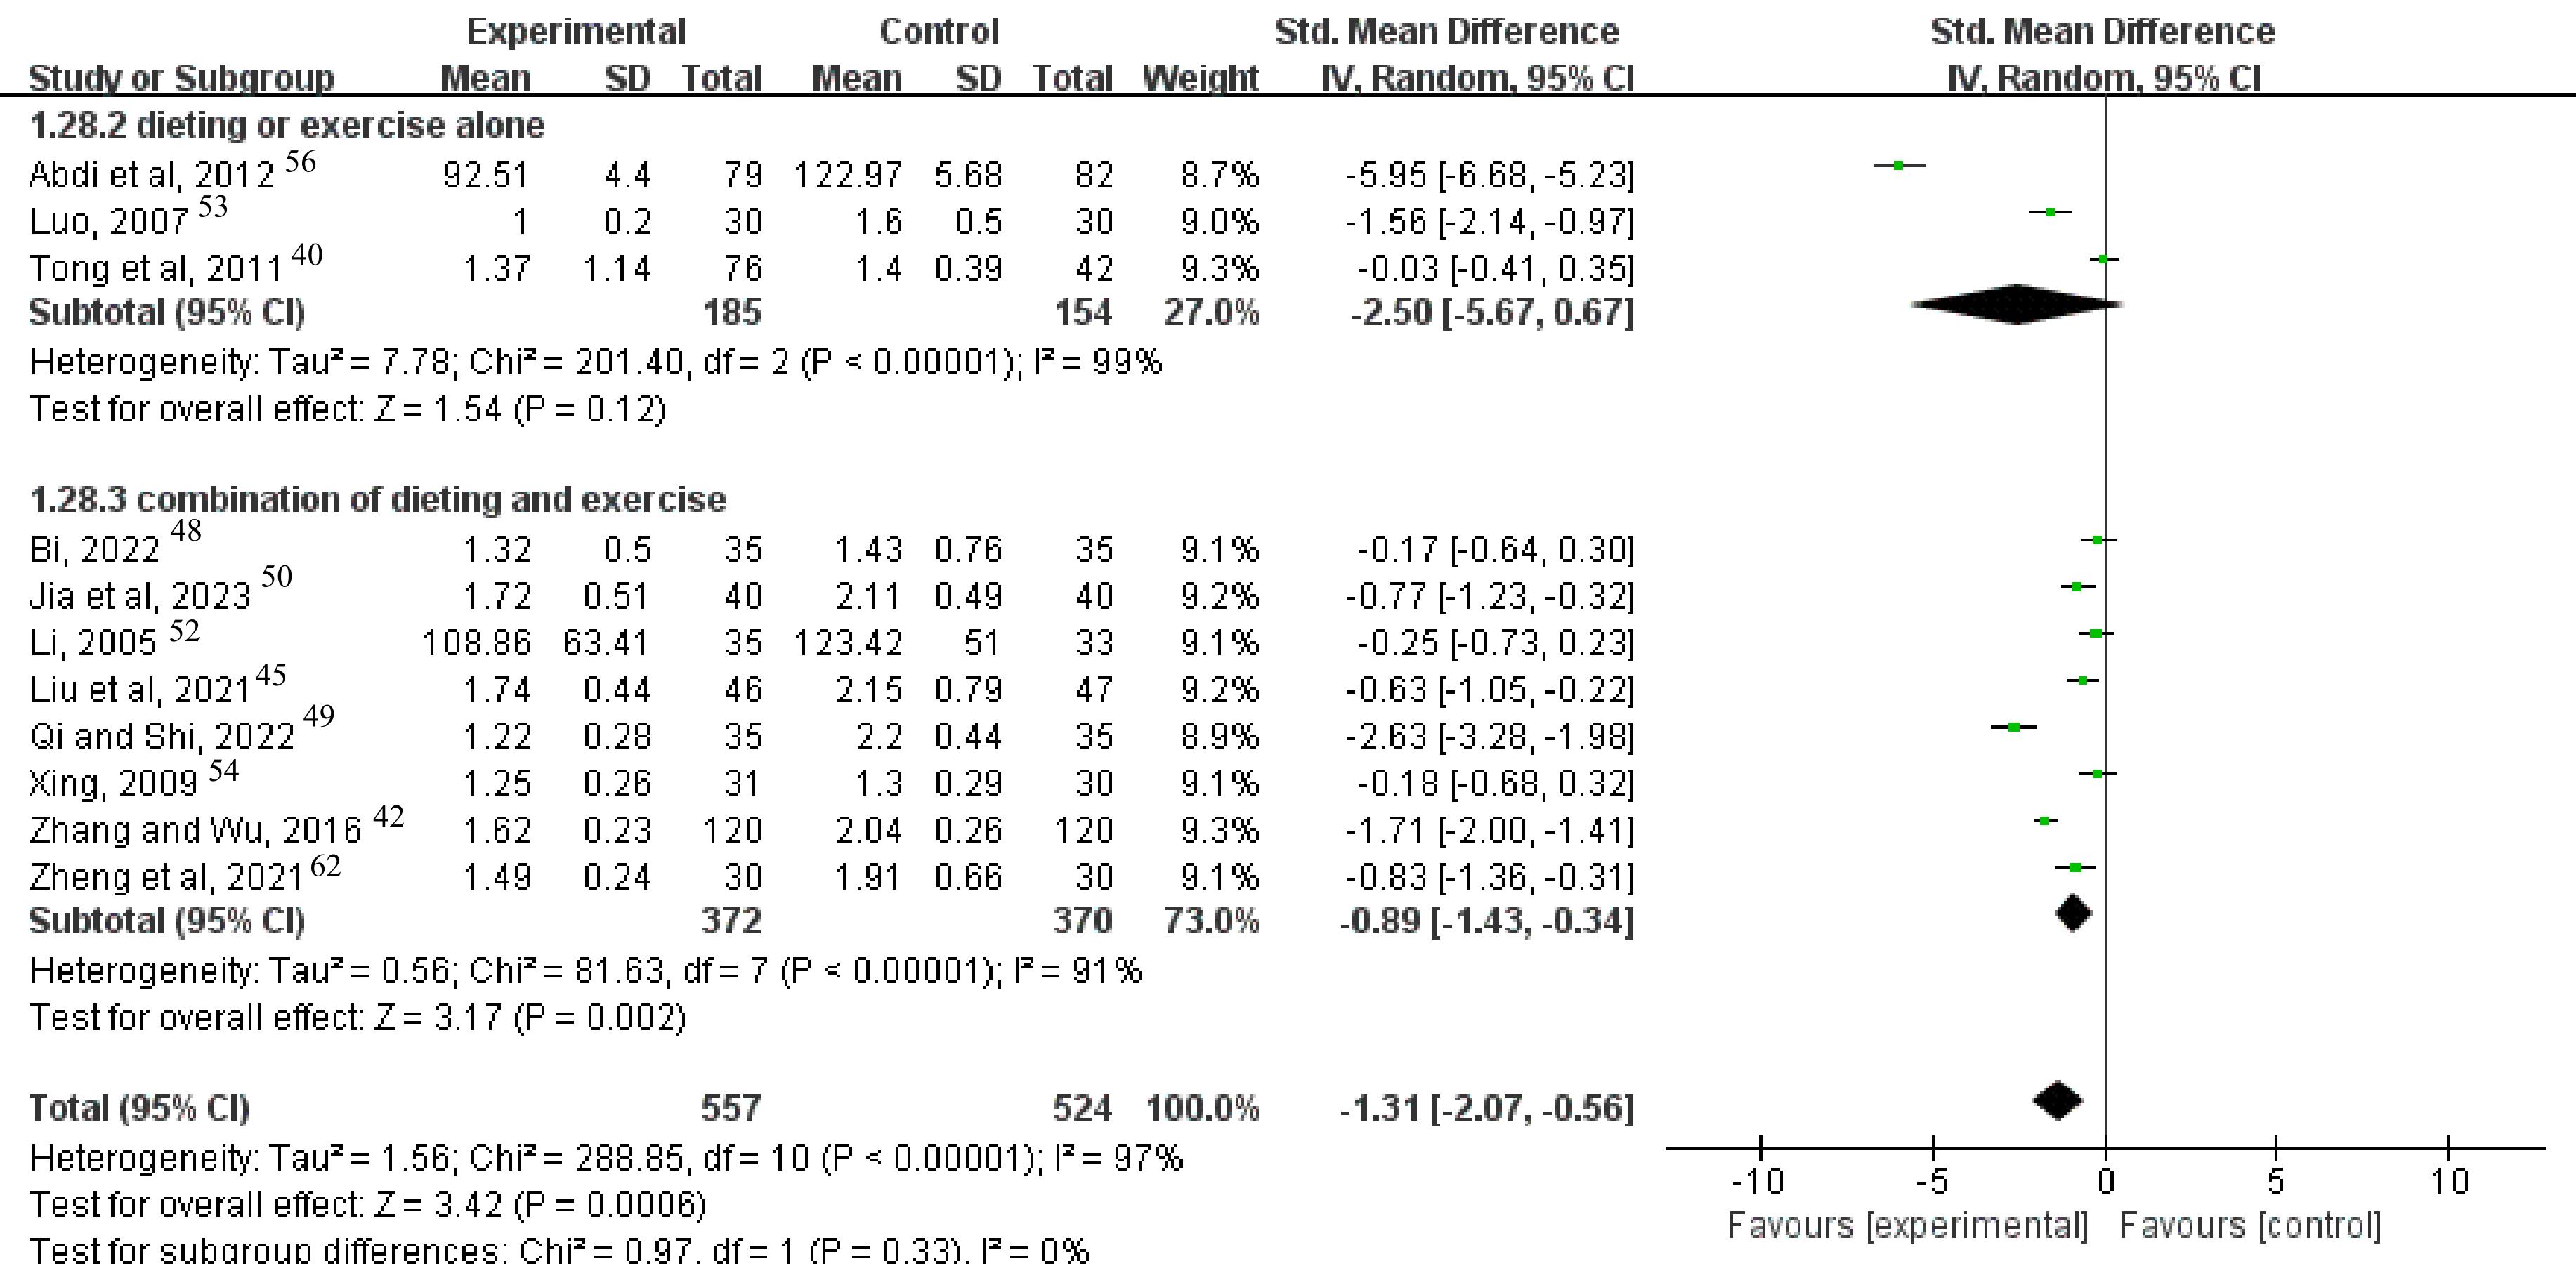


**Figure S15** Subgroup analysis of different lifestyle interventions on TG.


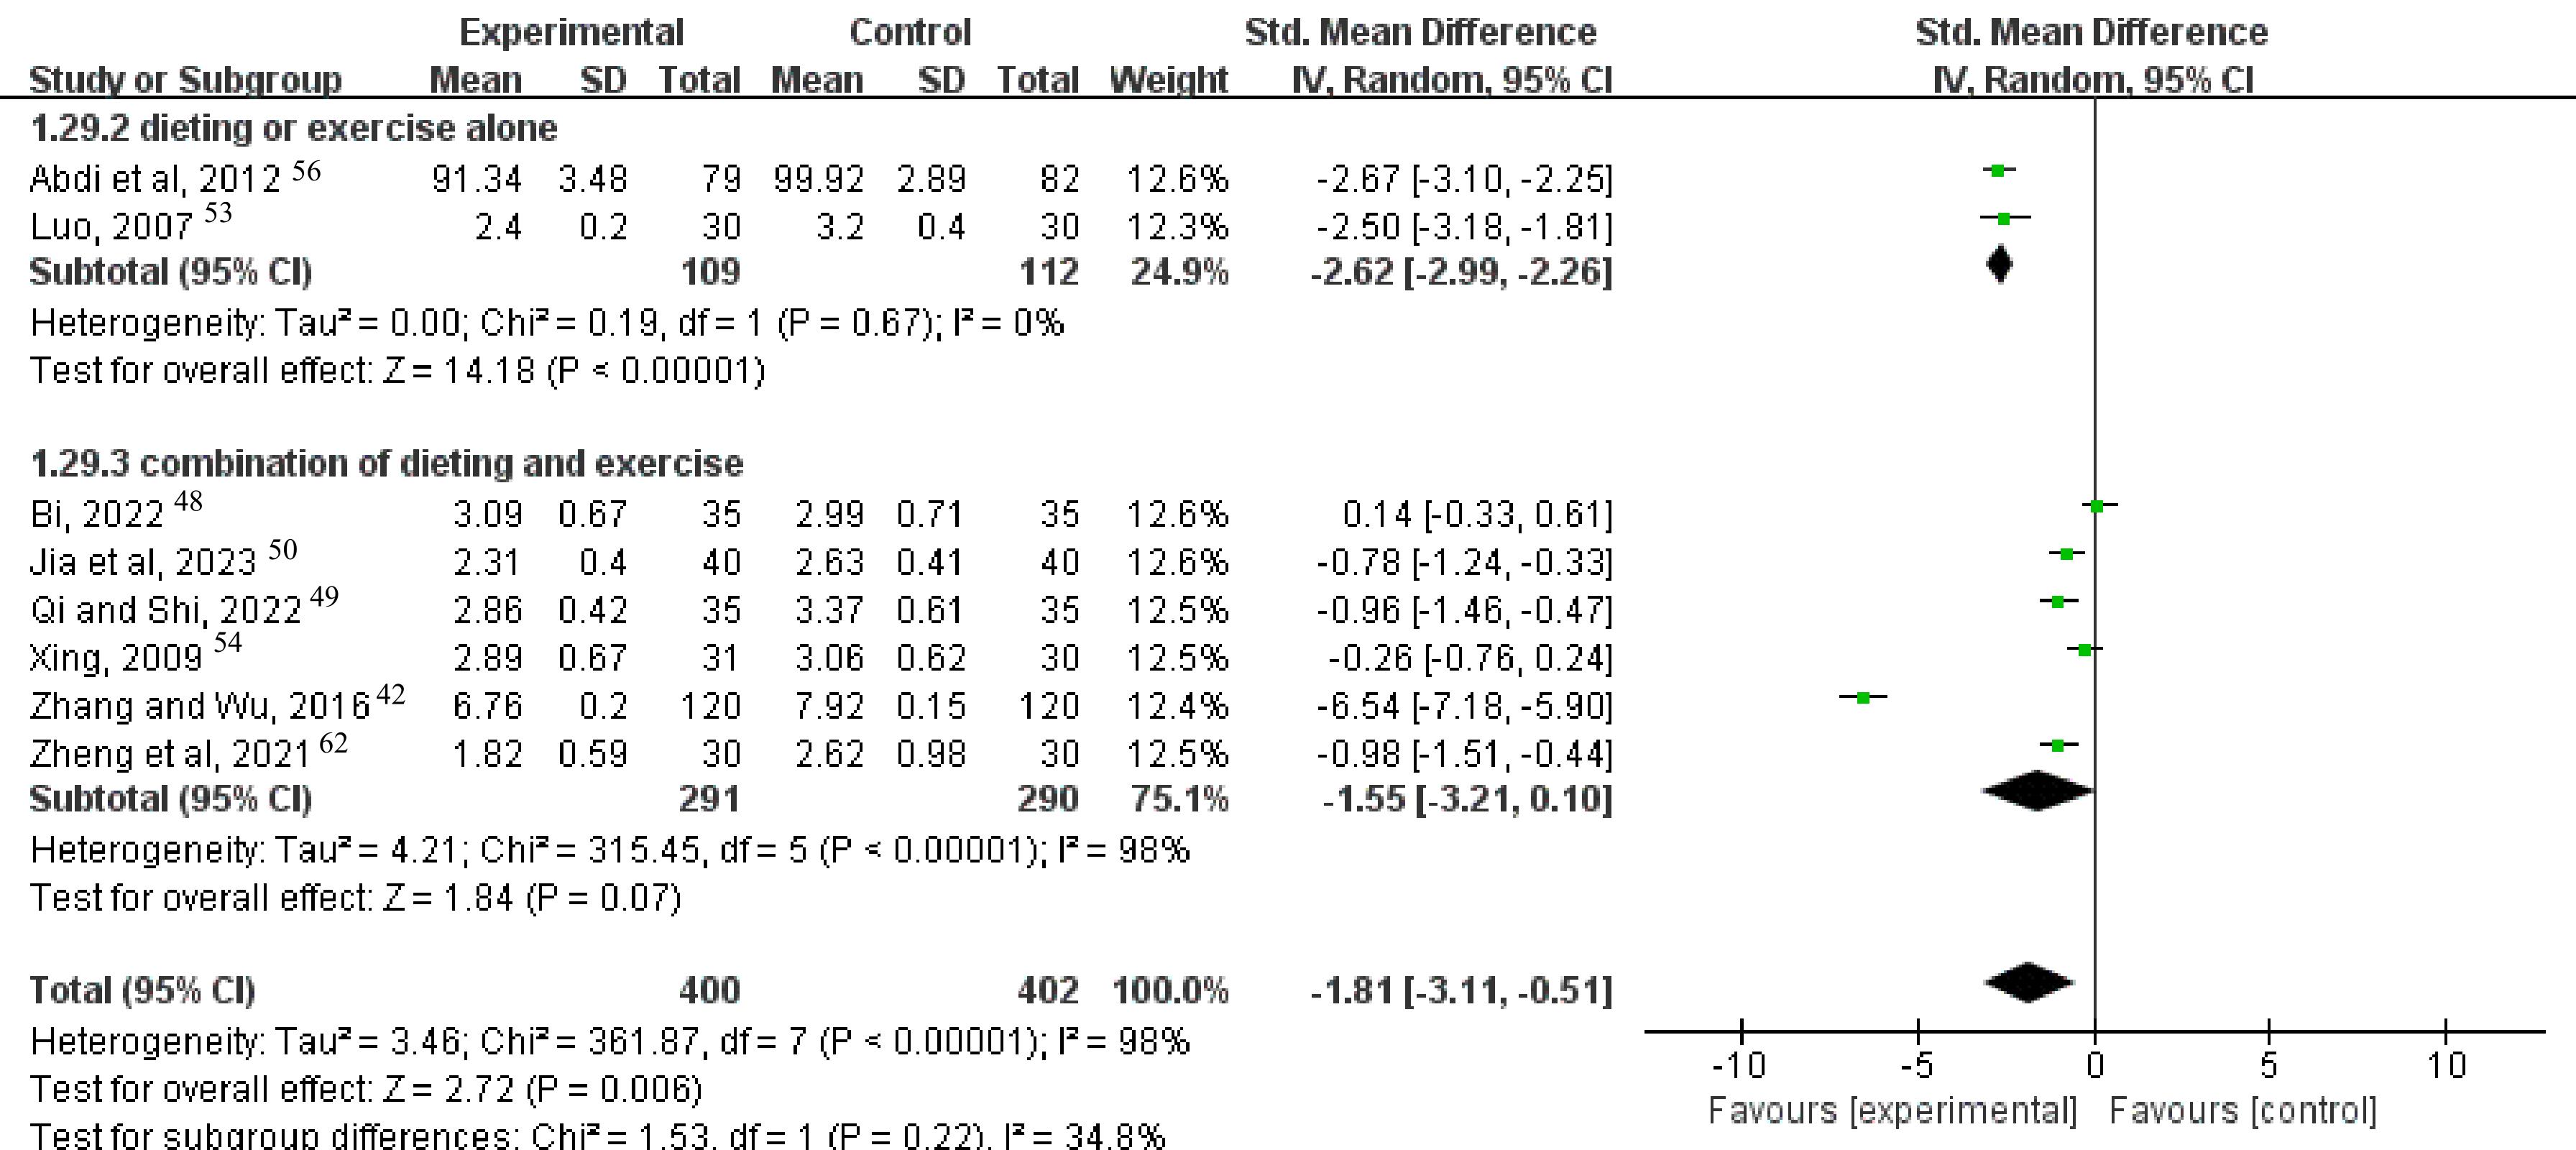


**Figure S16** Subgroup analysis of different lifestyle interventions on LDL-C.


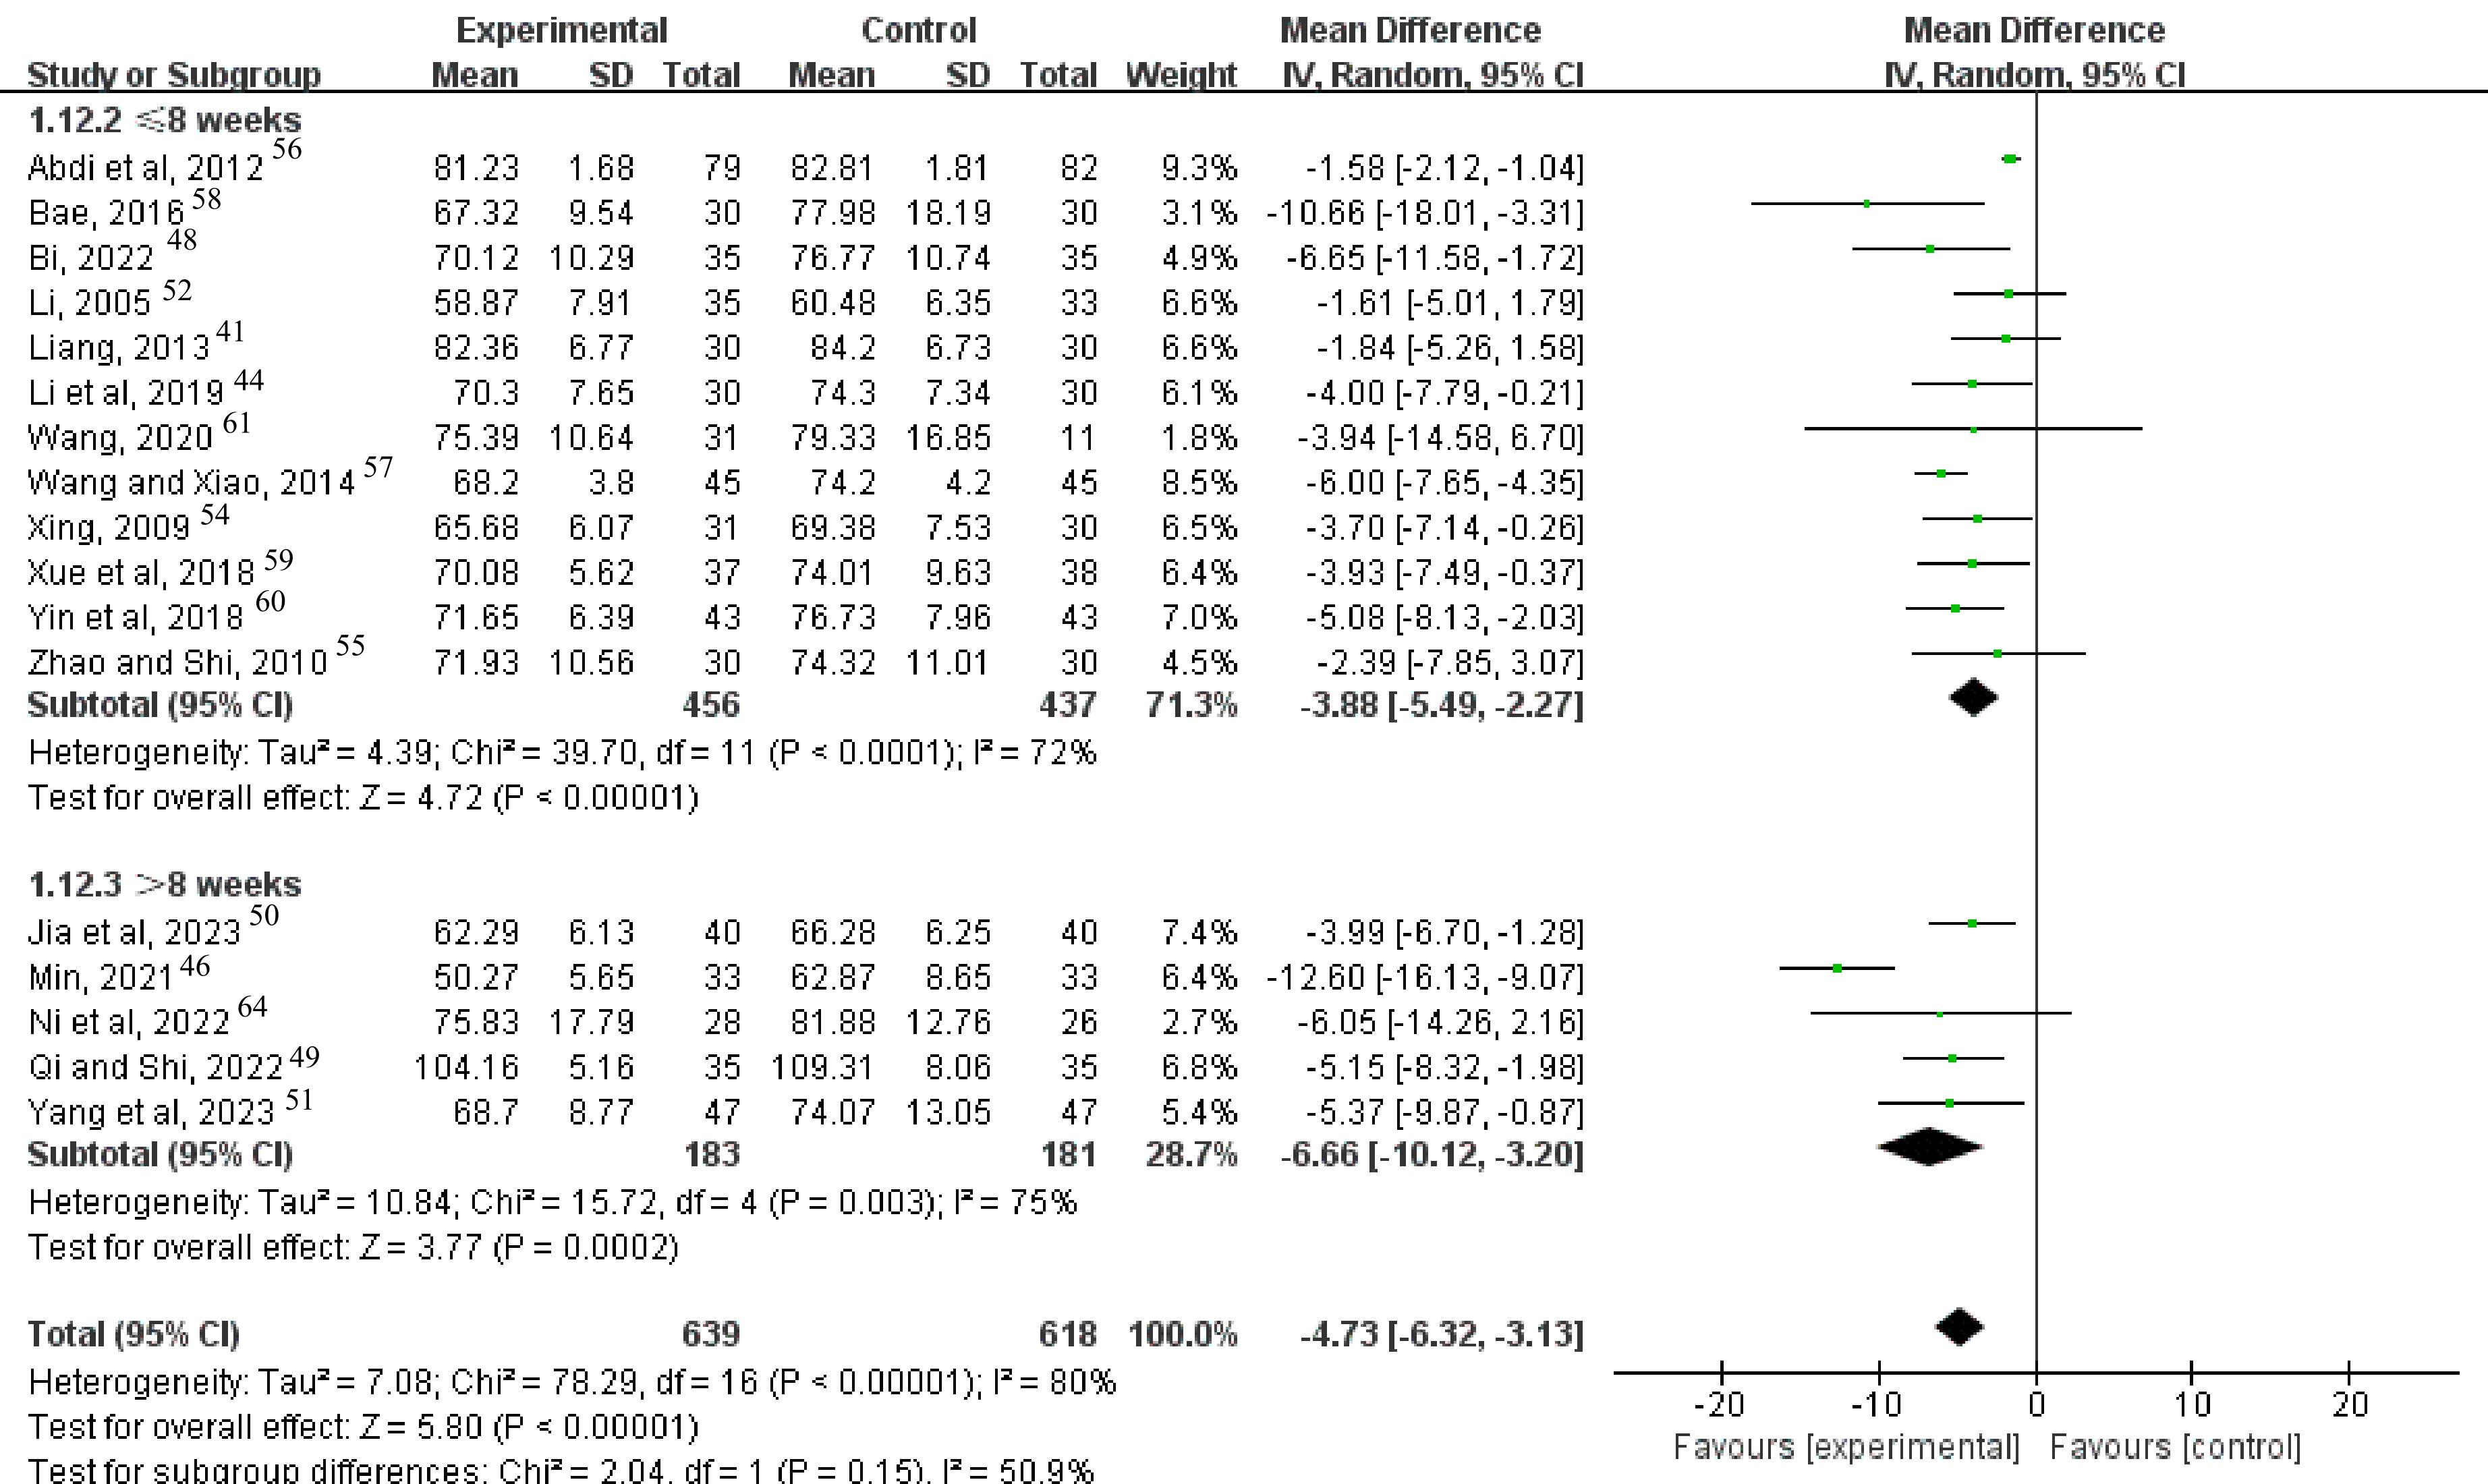


**Figure S17** Subgroup analysis of different treatment durations on body weight.


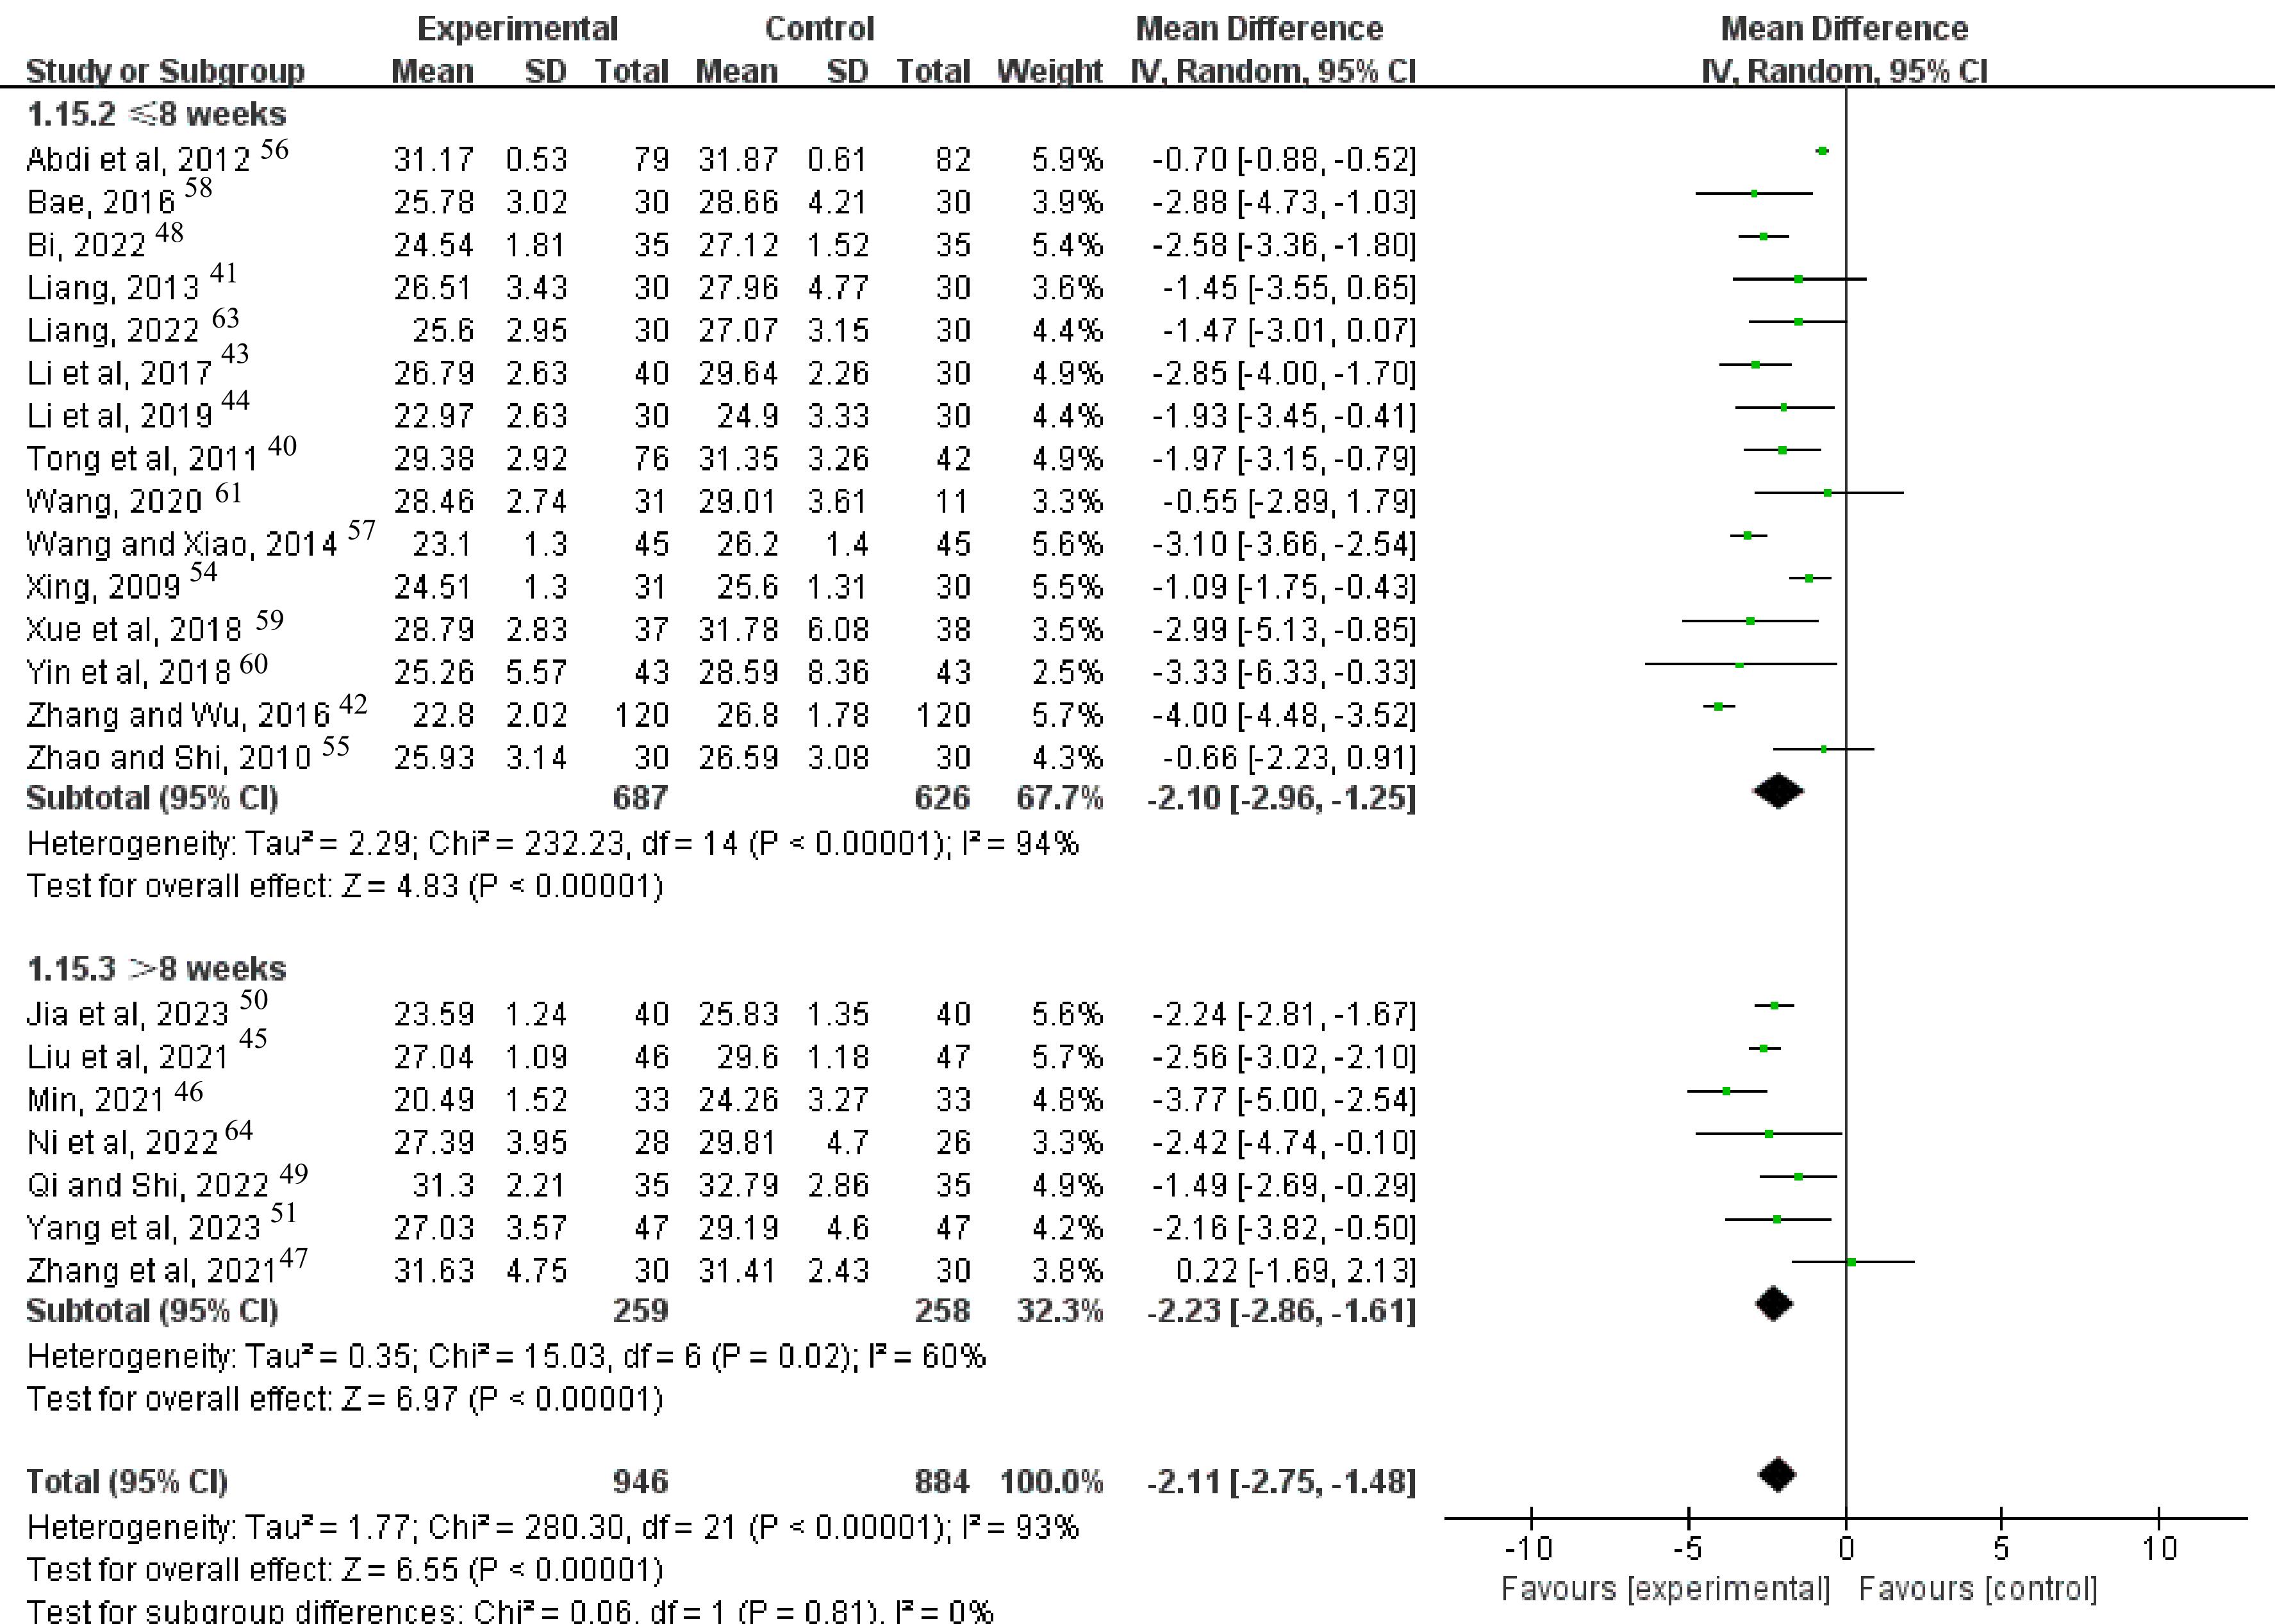


**Figure S18** Subgroup analysis of different treatment durations on BMI.


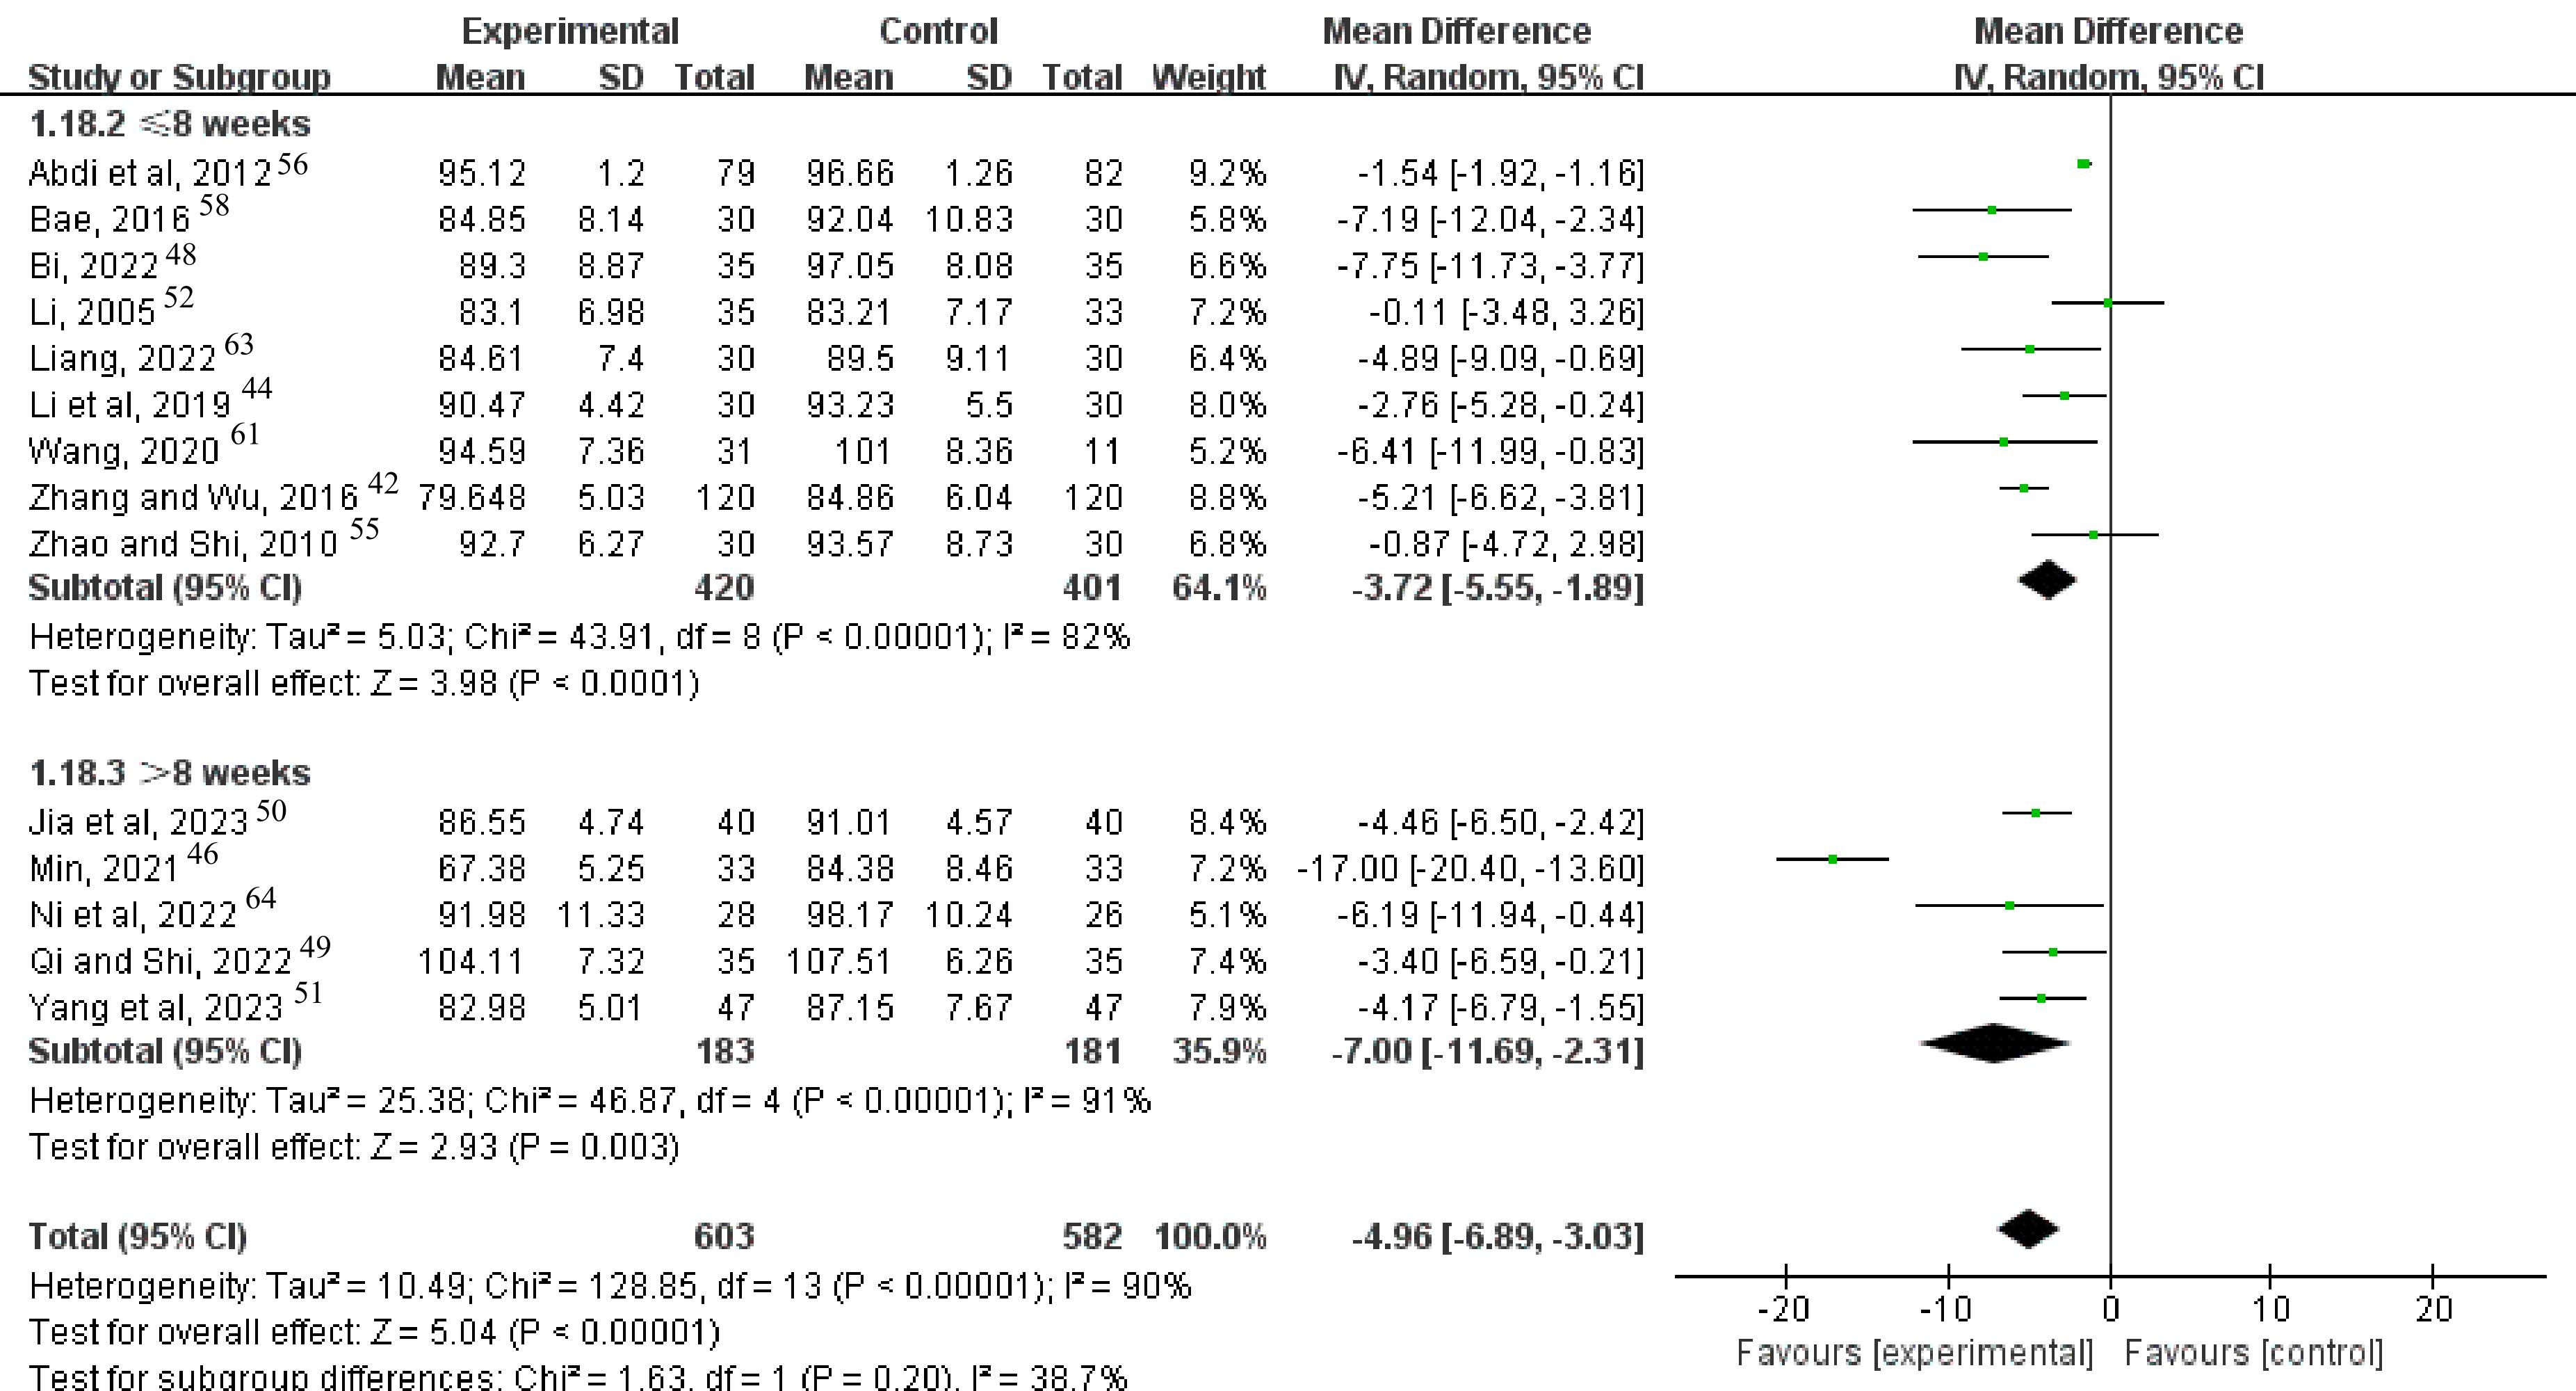


**Figure S19** Subgroup analysis of different treatment durations on WC.


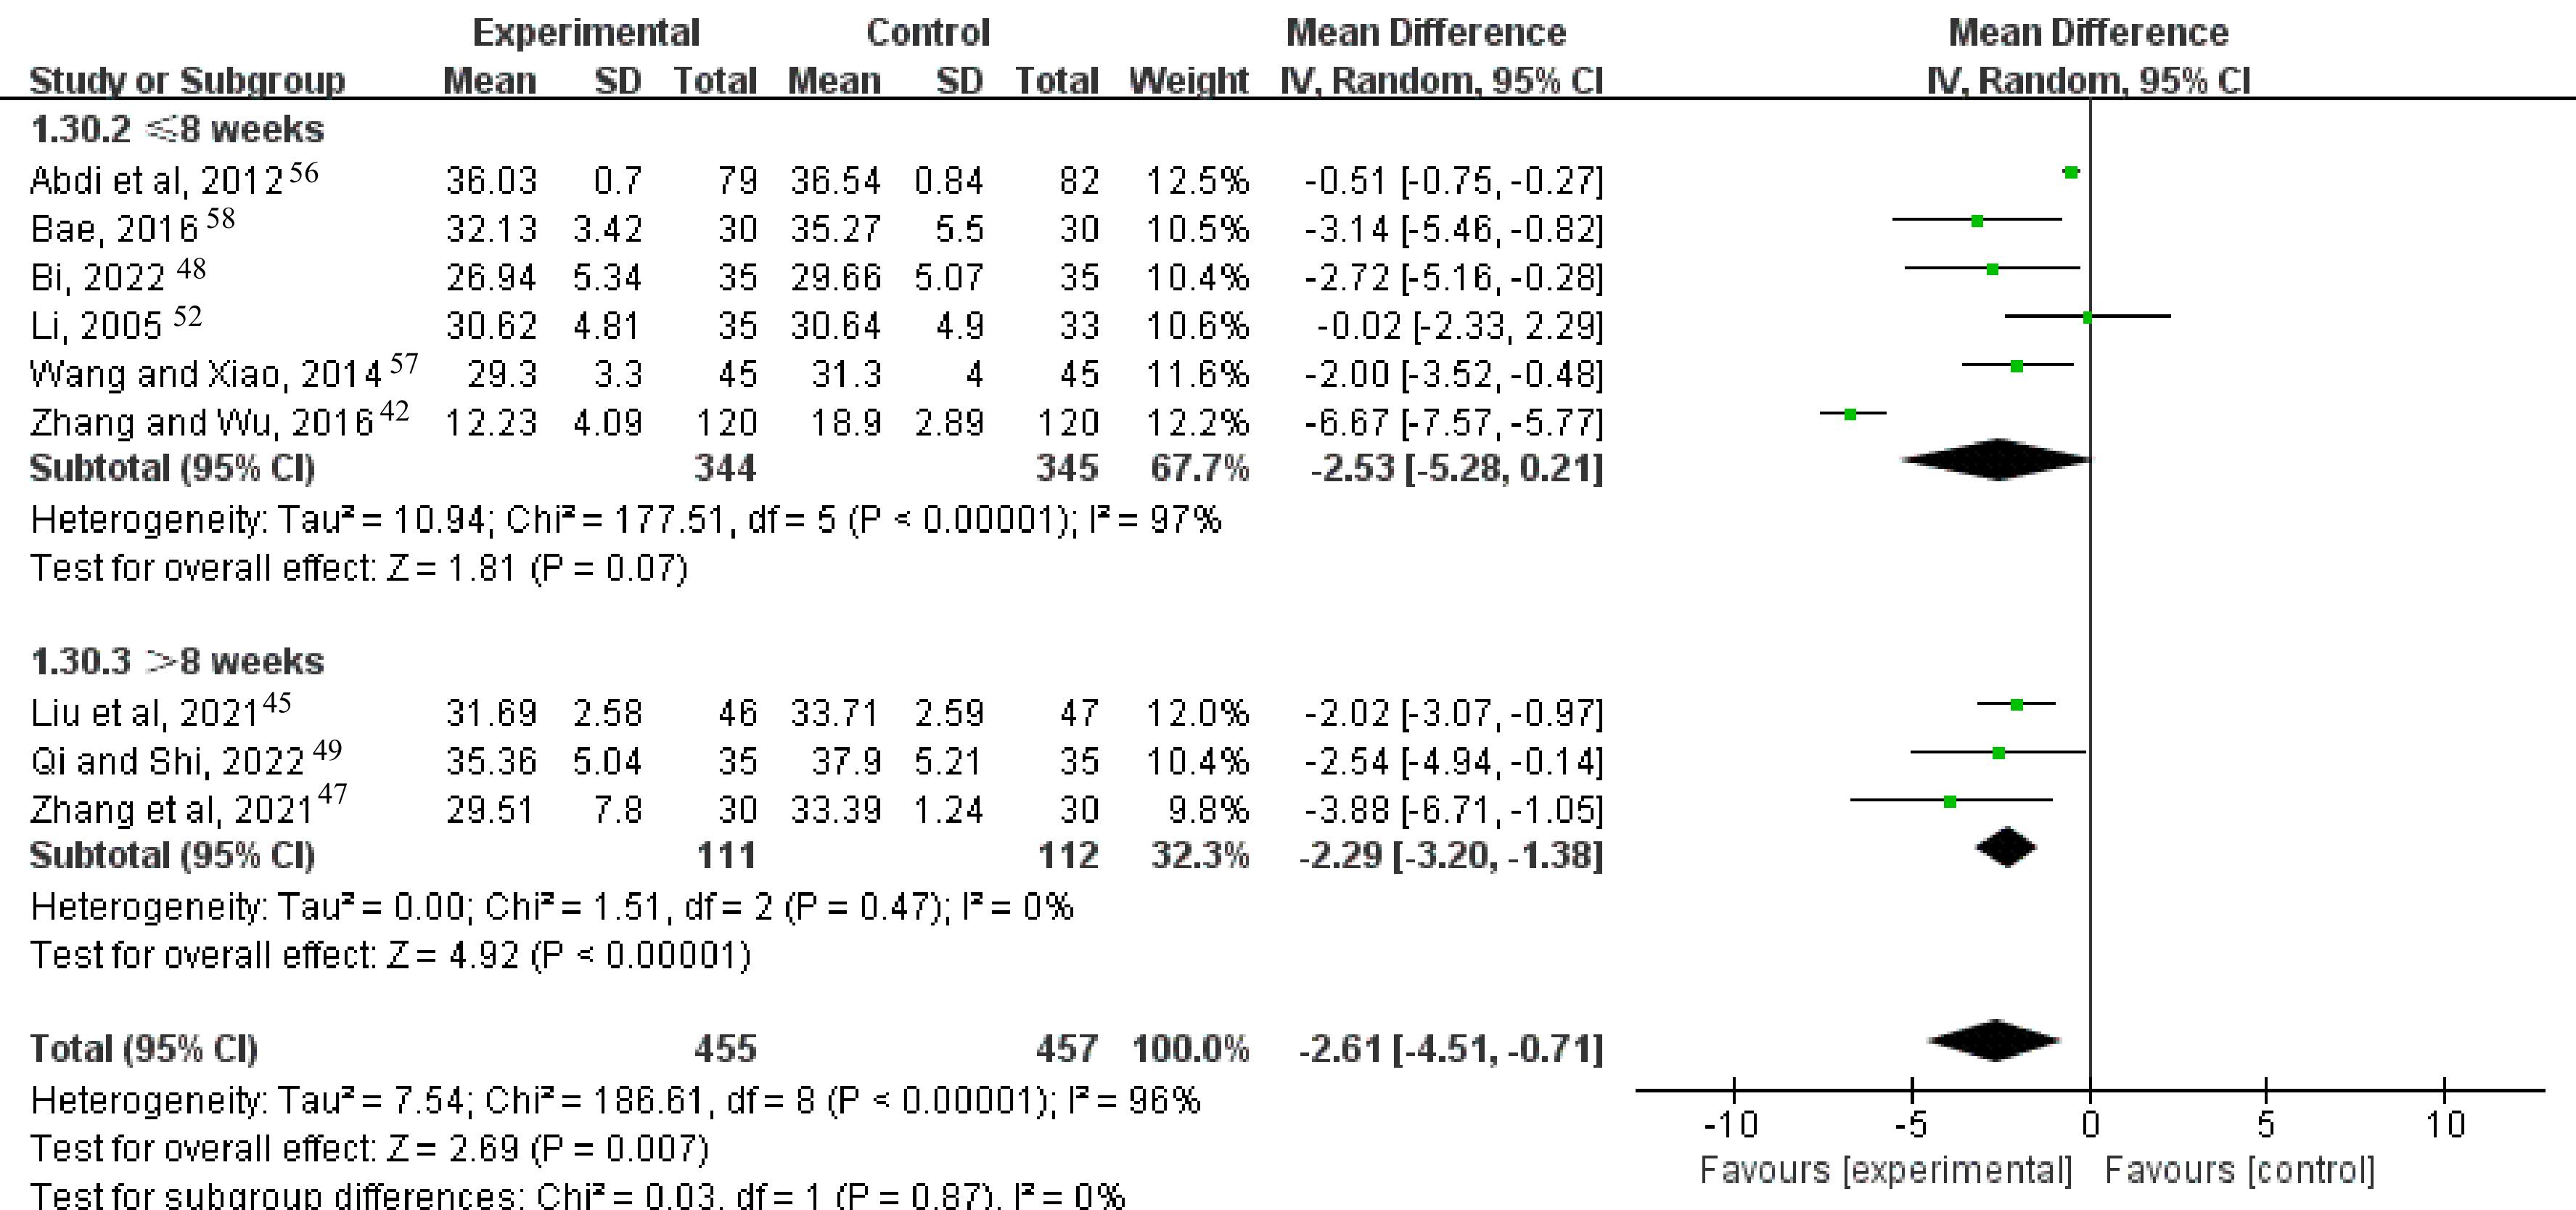


**Figure S20** Subgroup analysis of different treatment durations on BF %.


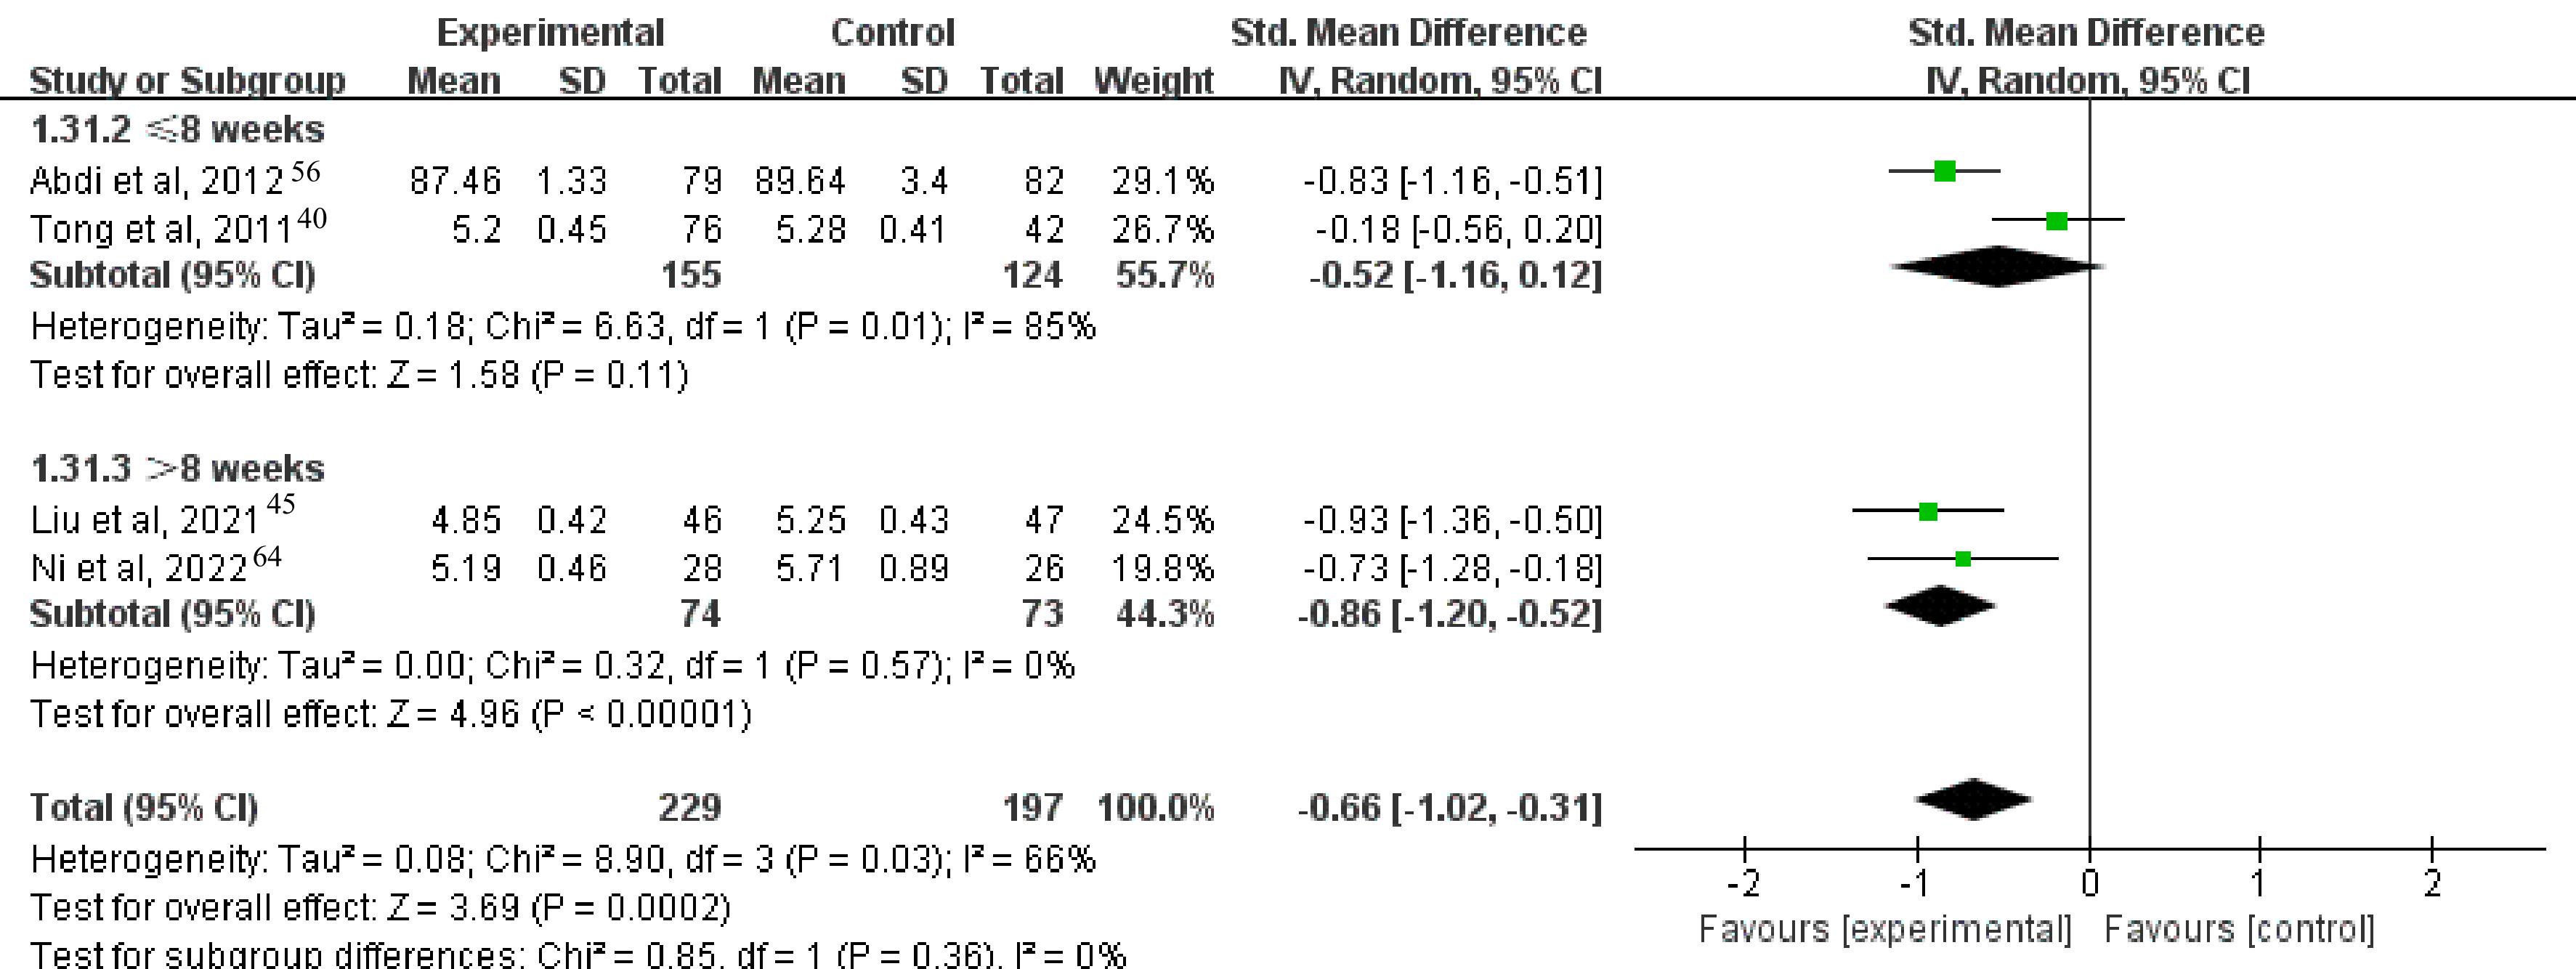


**Figure S21** Subgroup analysis of different treatment durations on FPG.


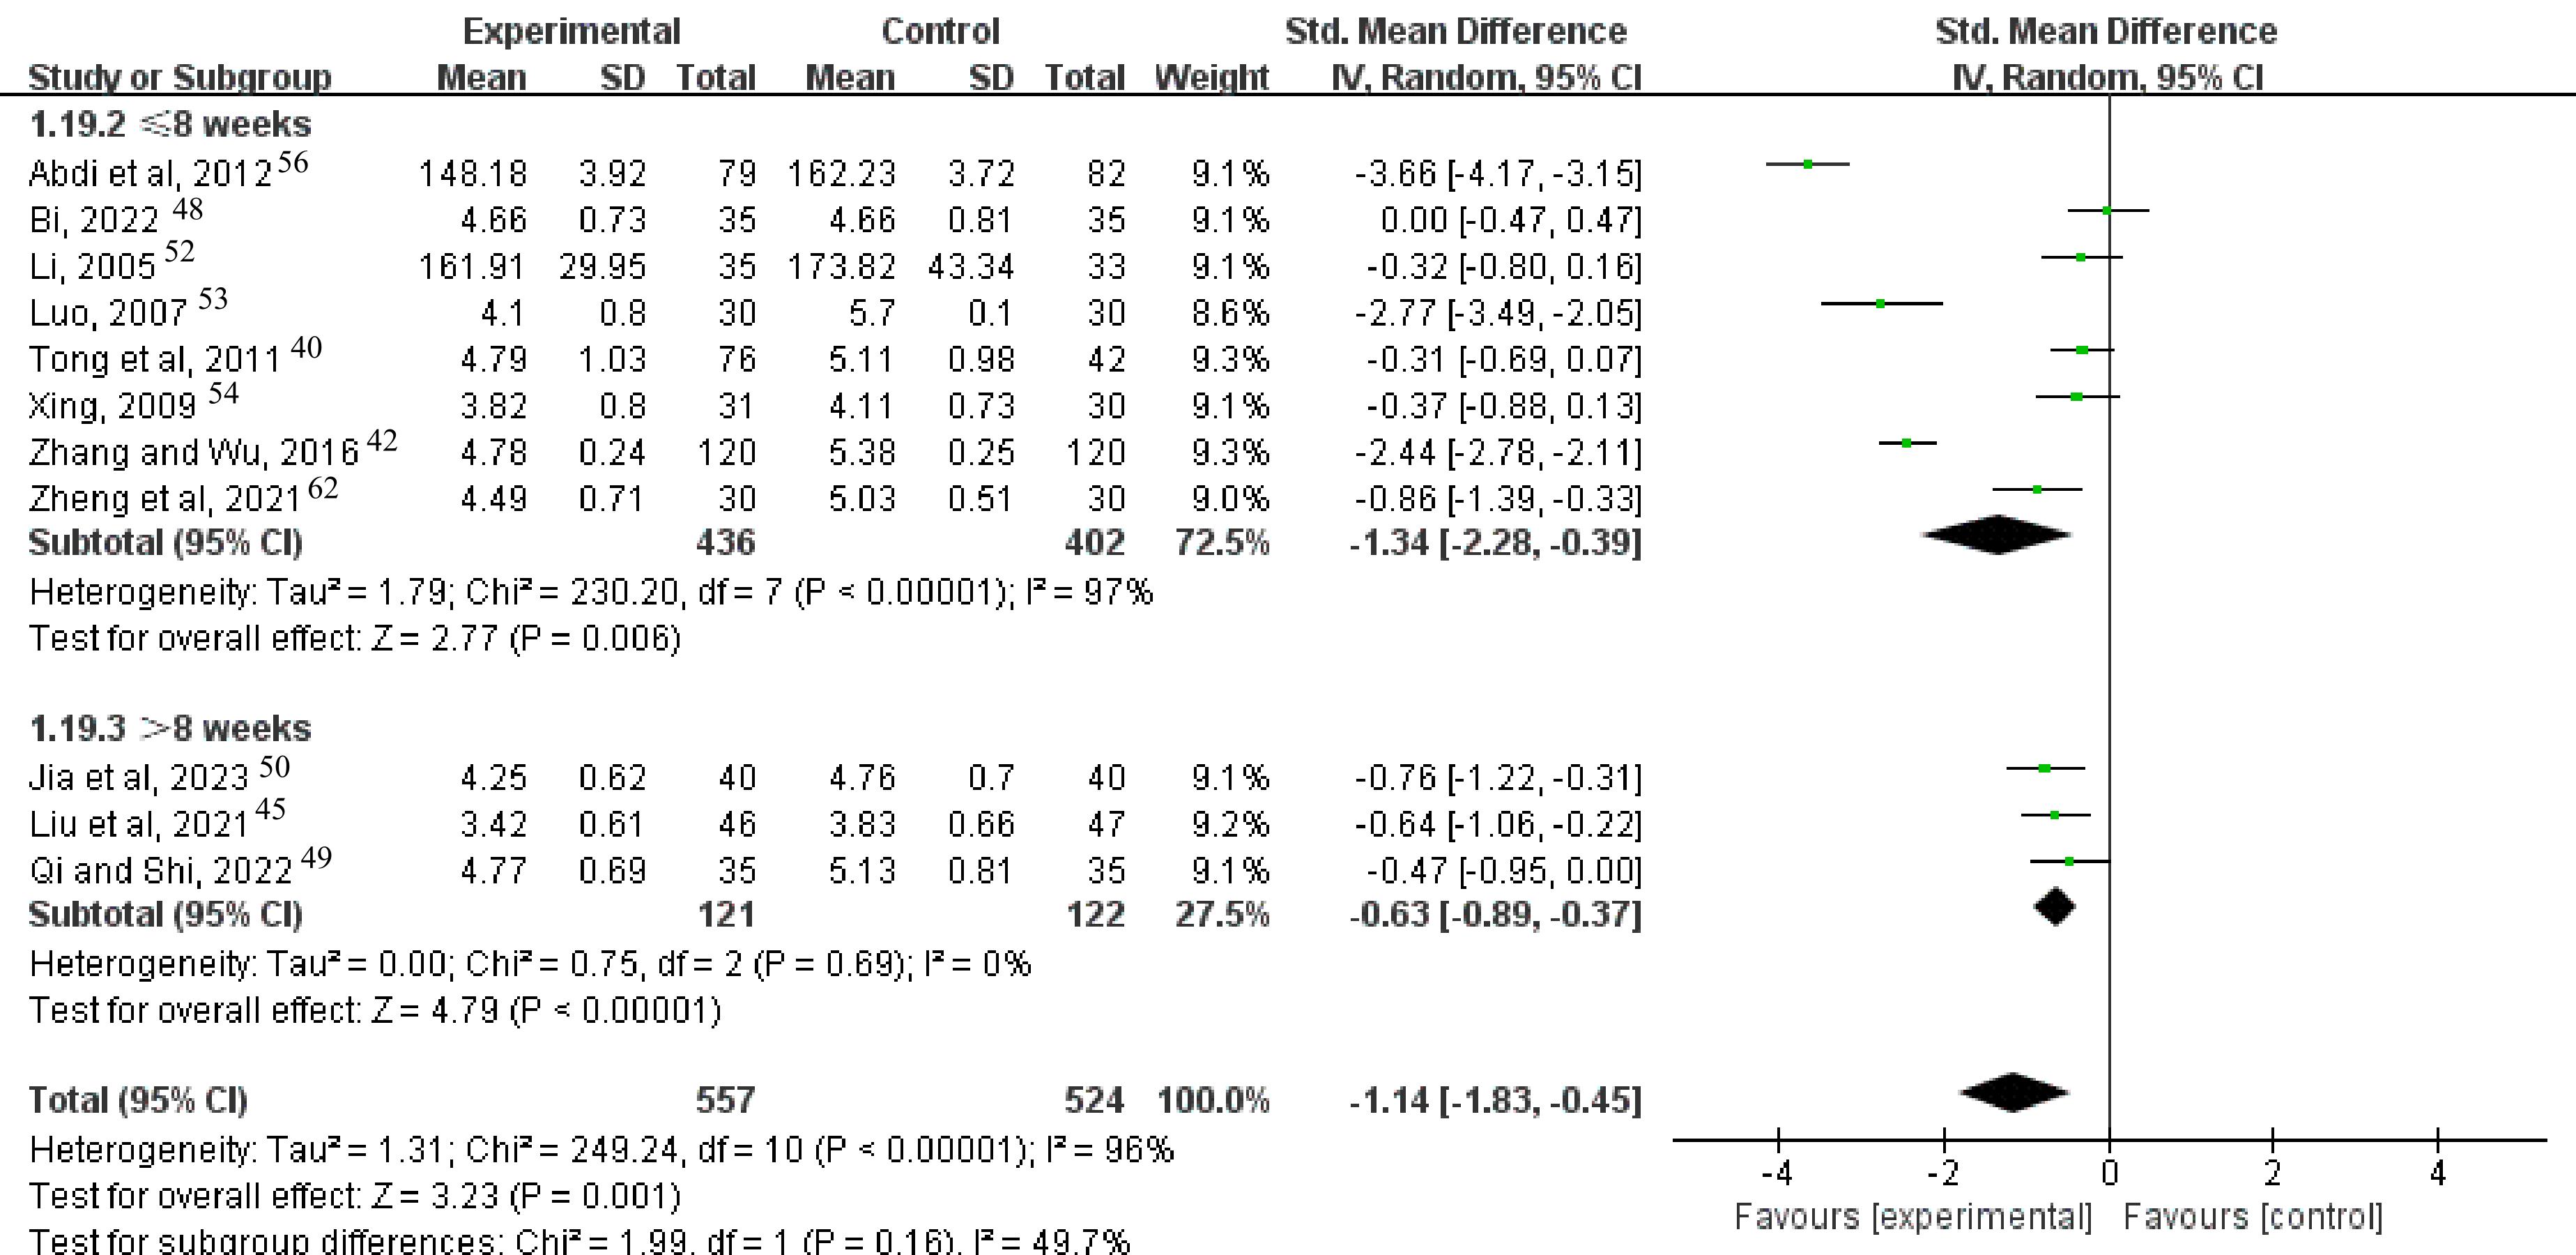


**Figure S22** Subgroup analysis of different treatment durations on TC.


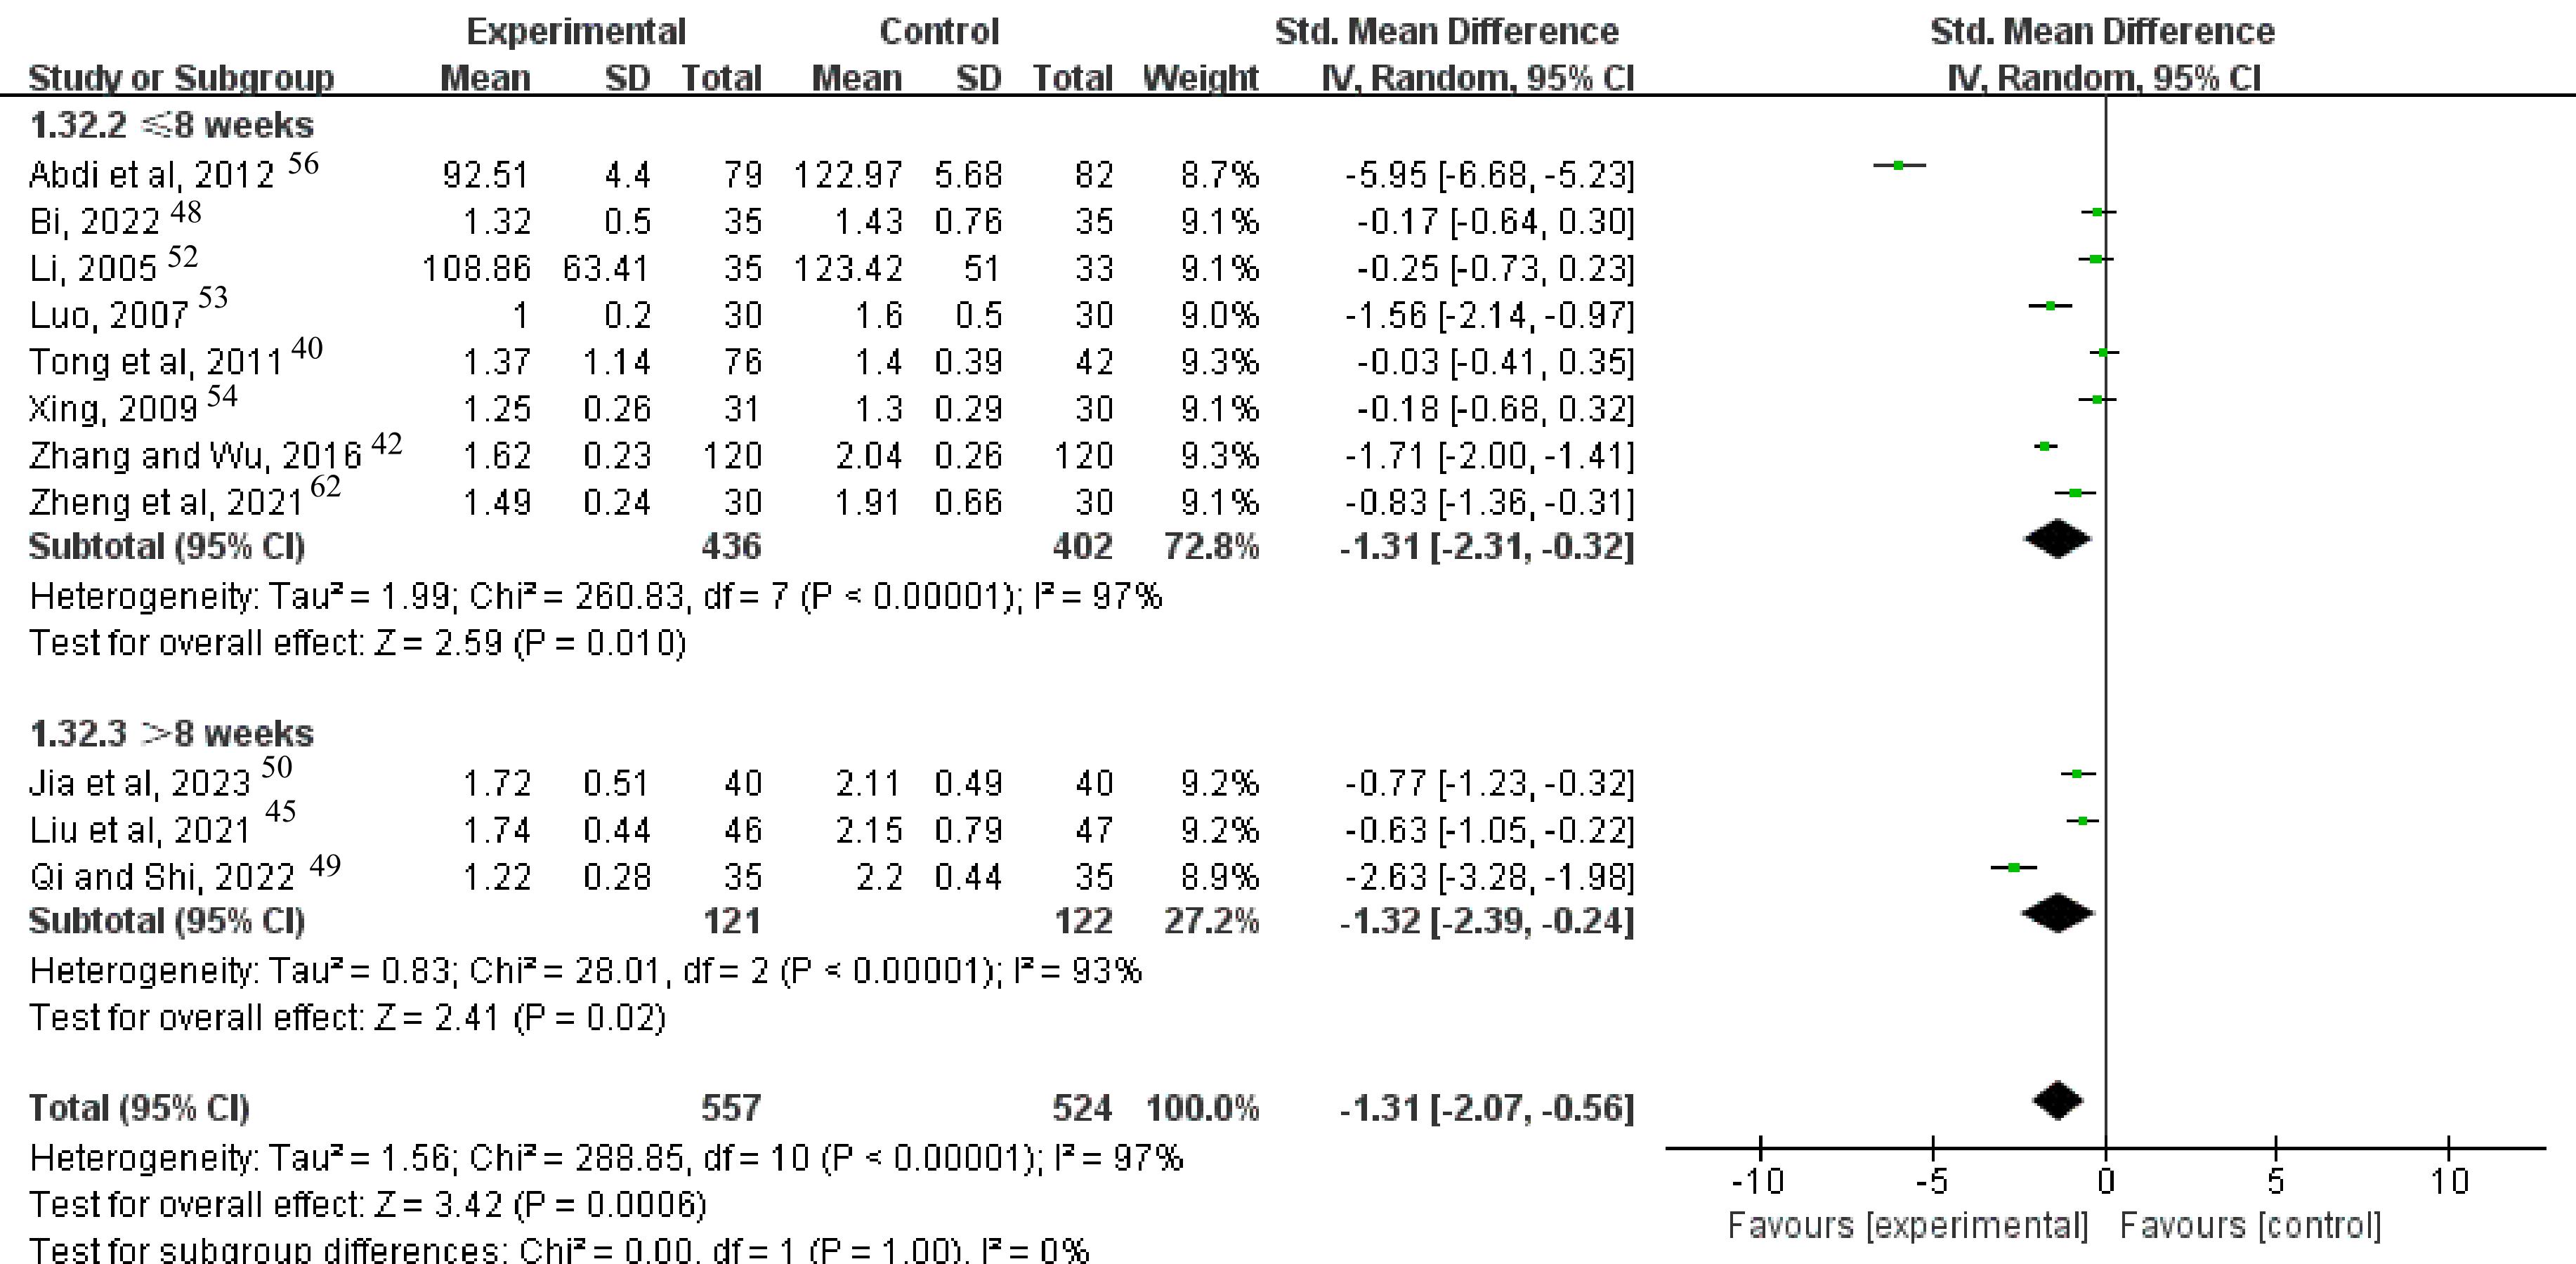


**Figure S23** Subgroup analysis of different treatment durations on TG.


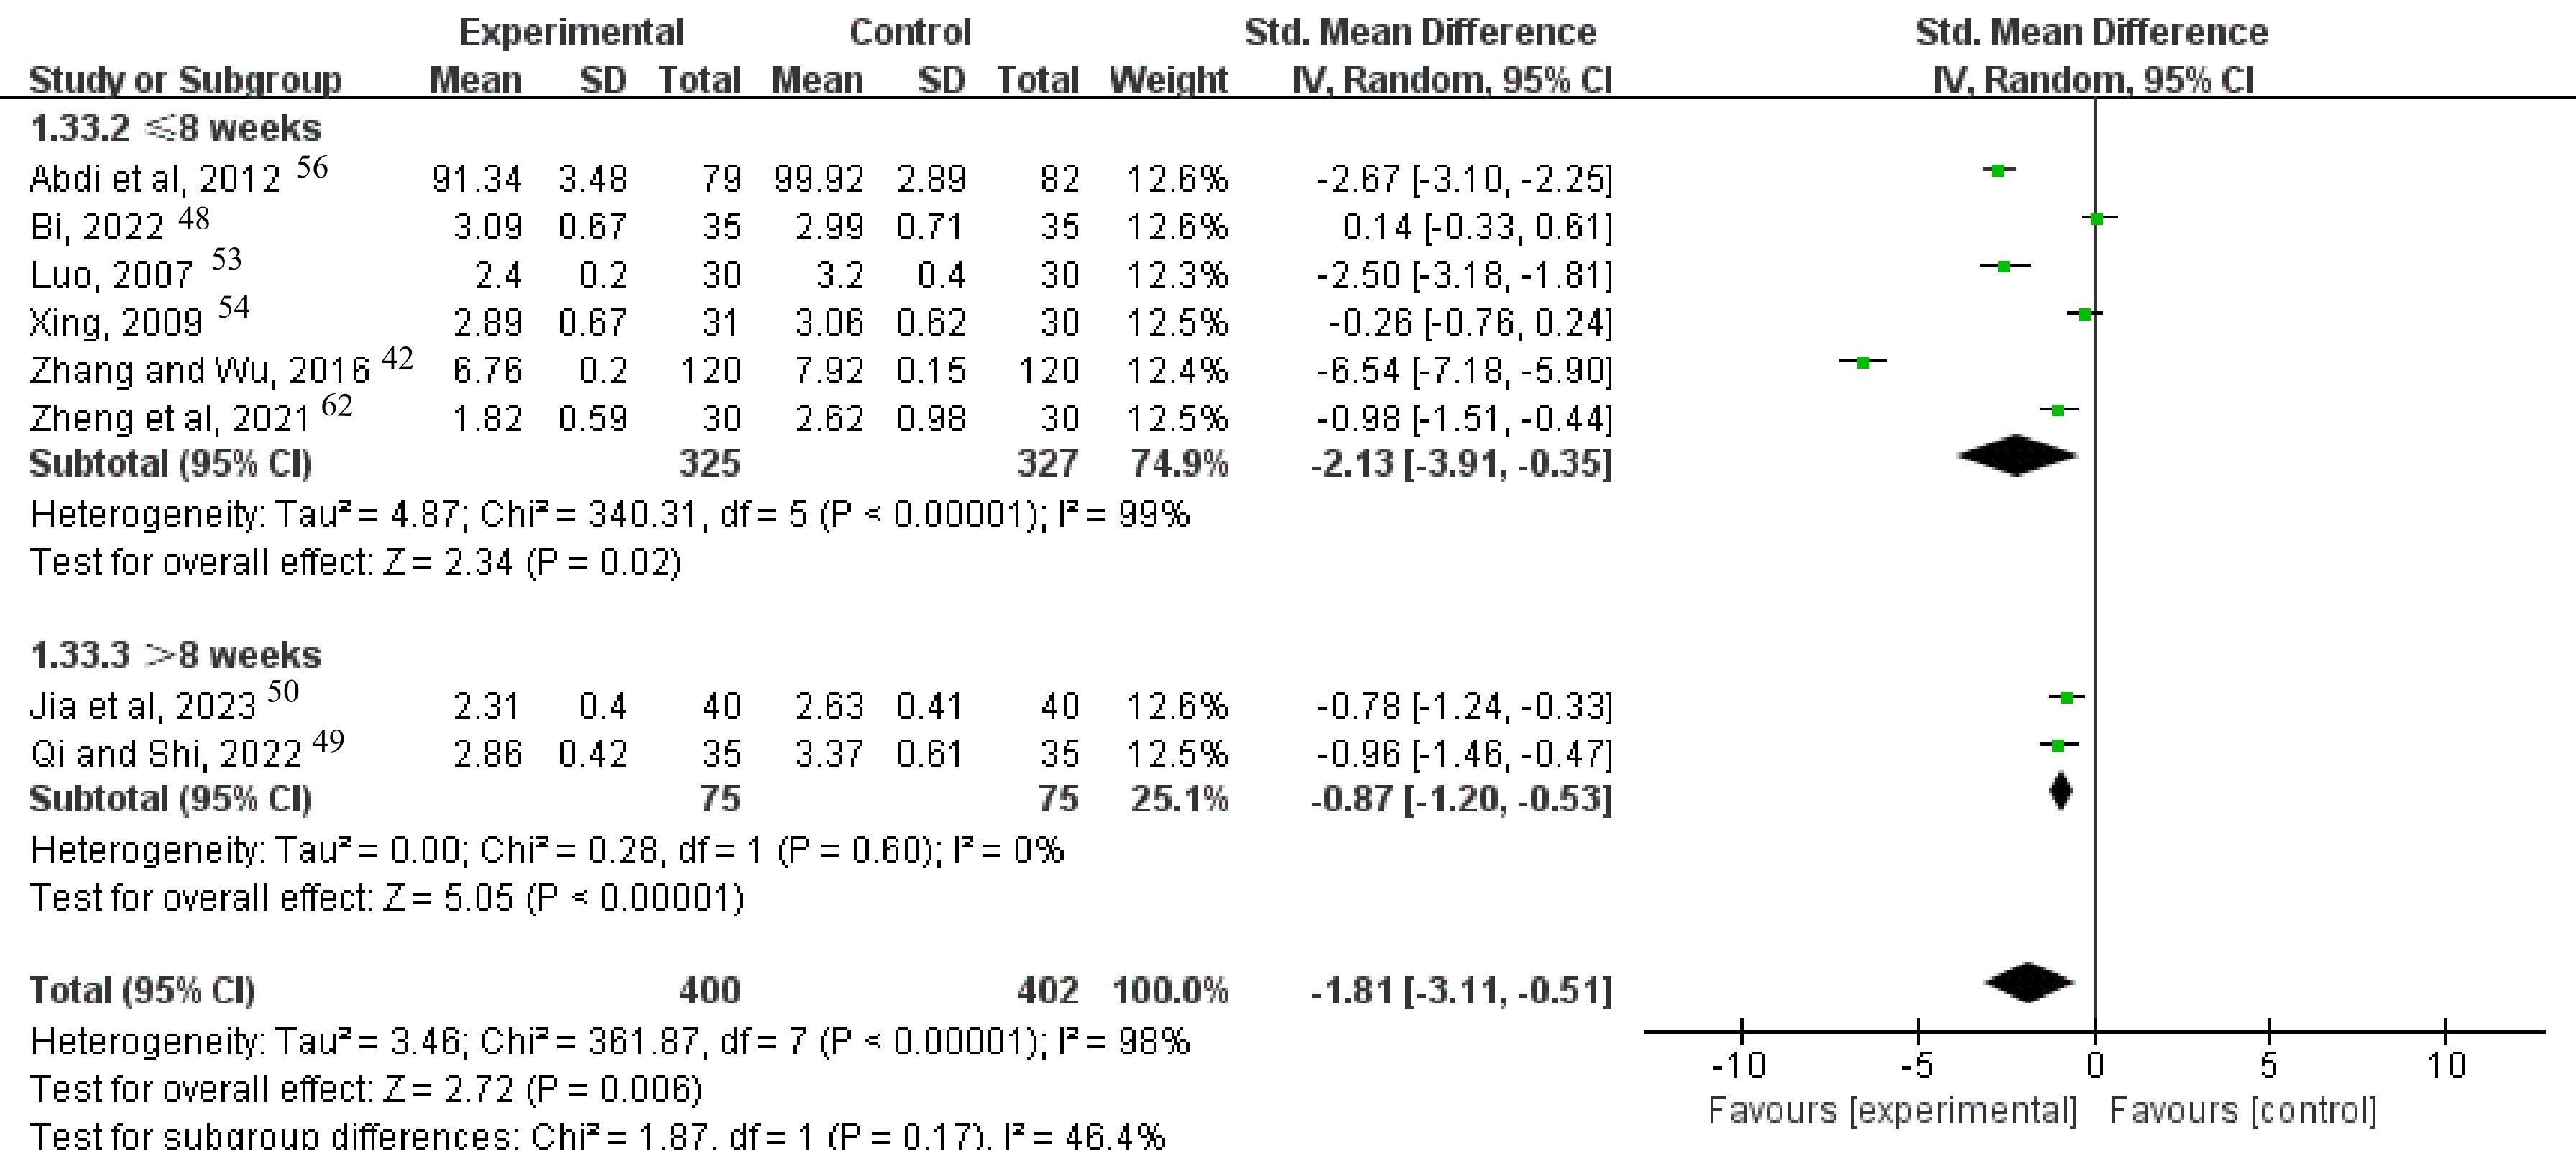


**Figure S24** Subgroup analysis of different treatment durations on LDL-C.


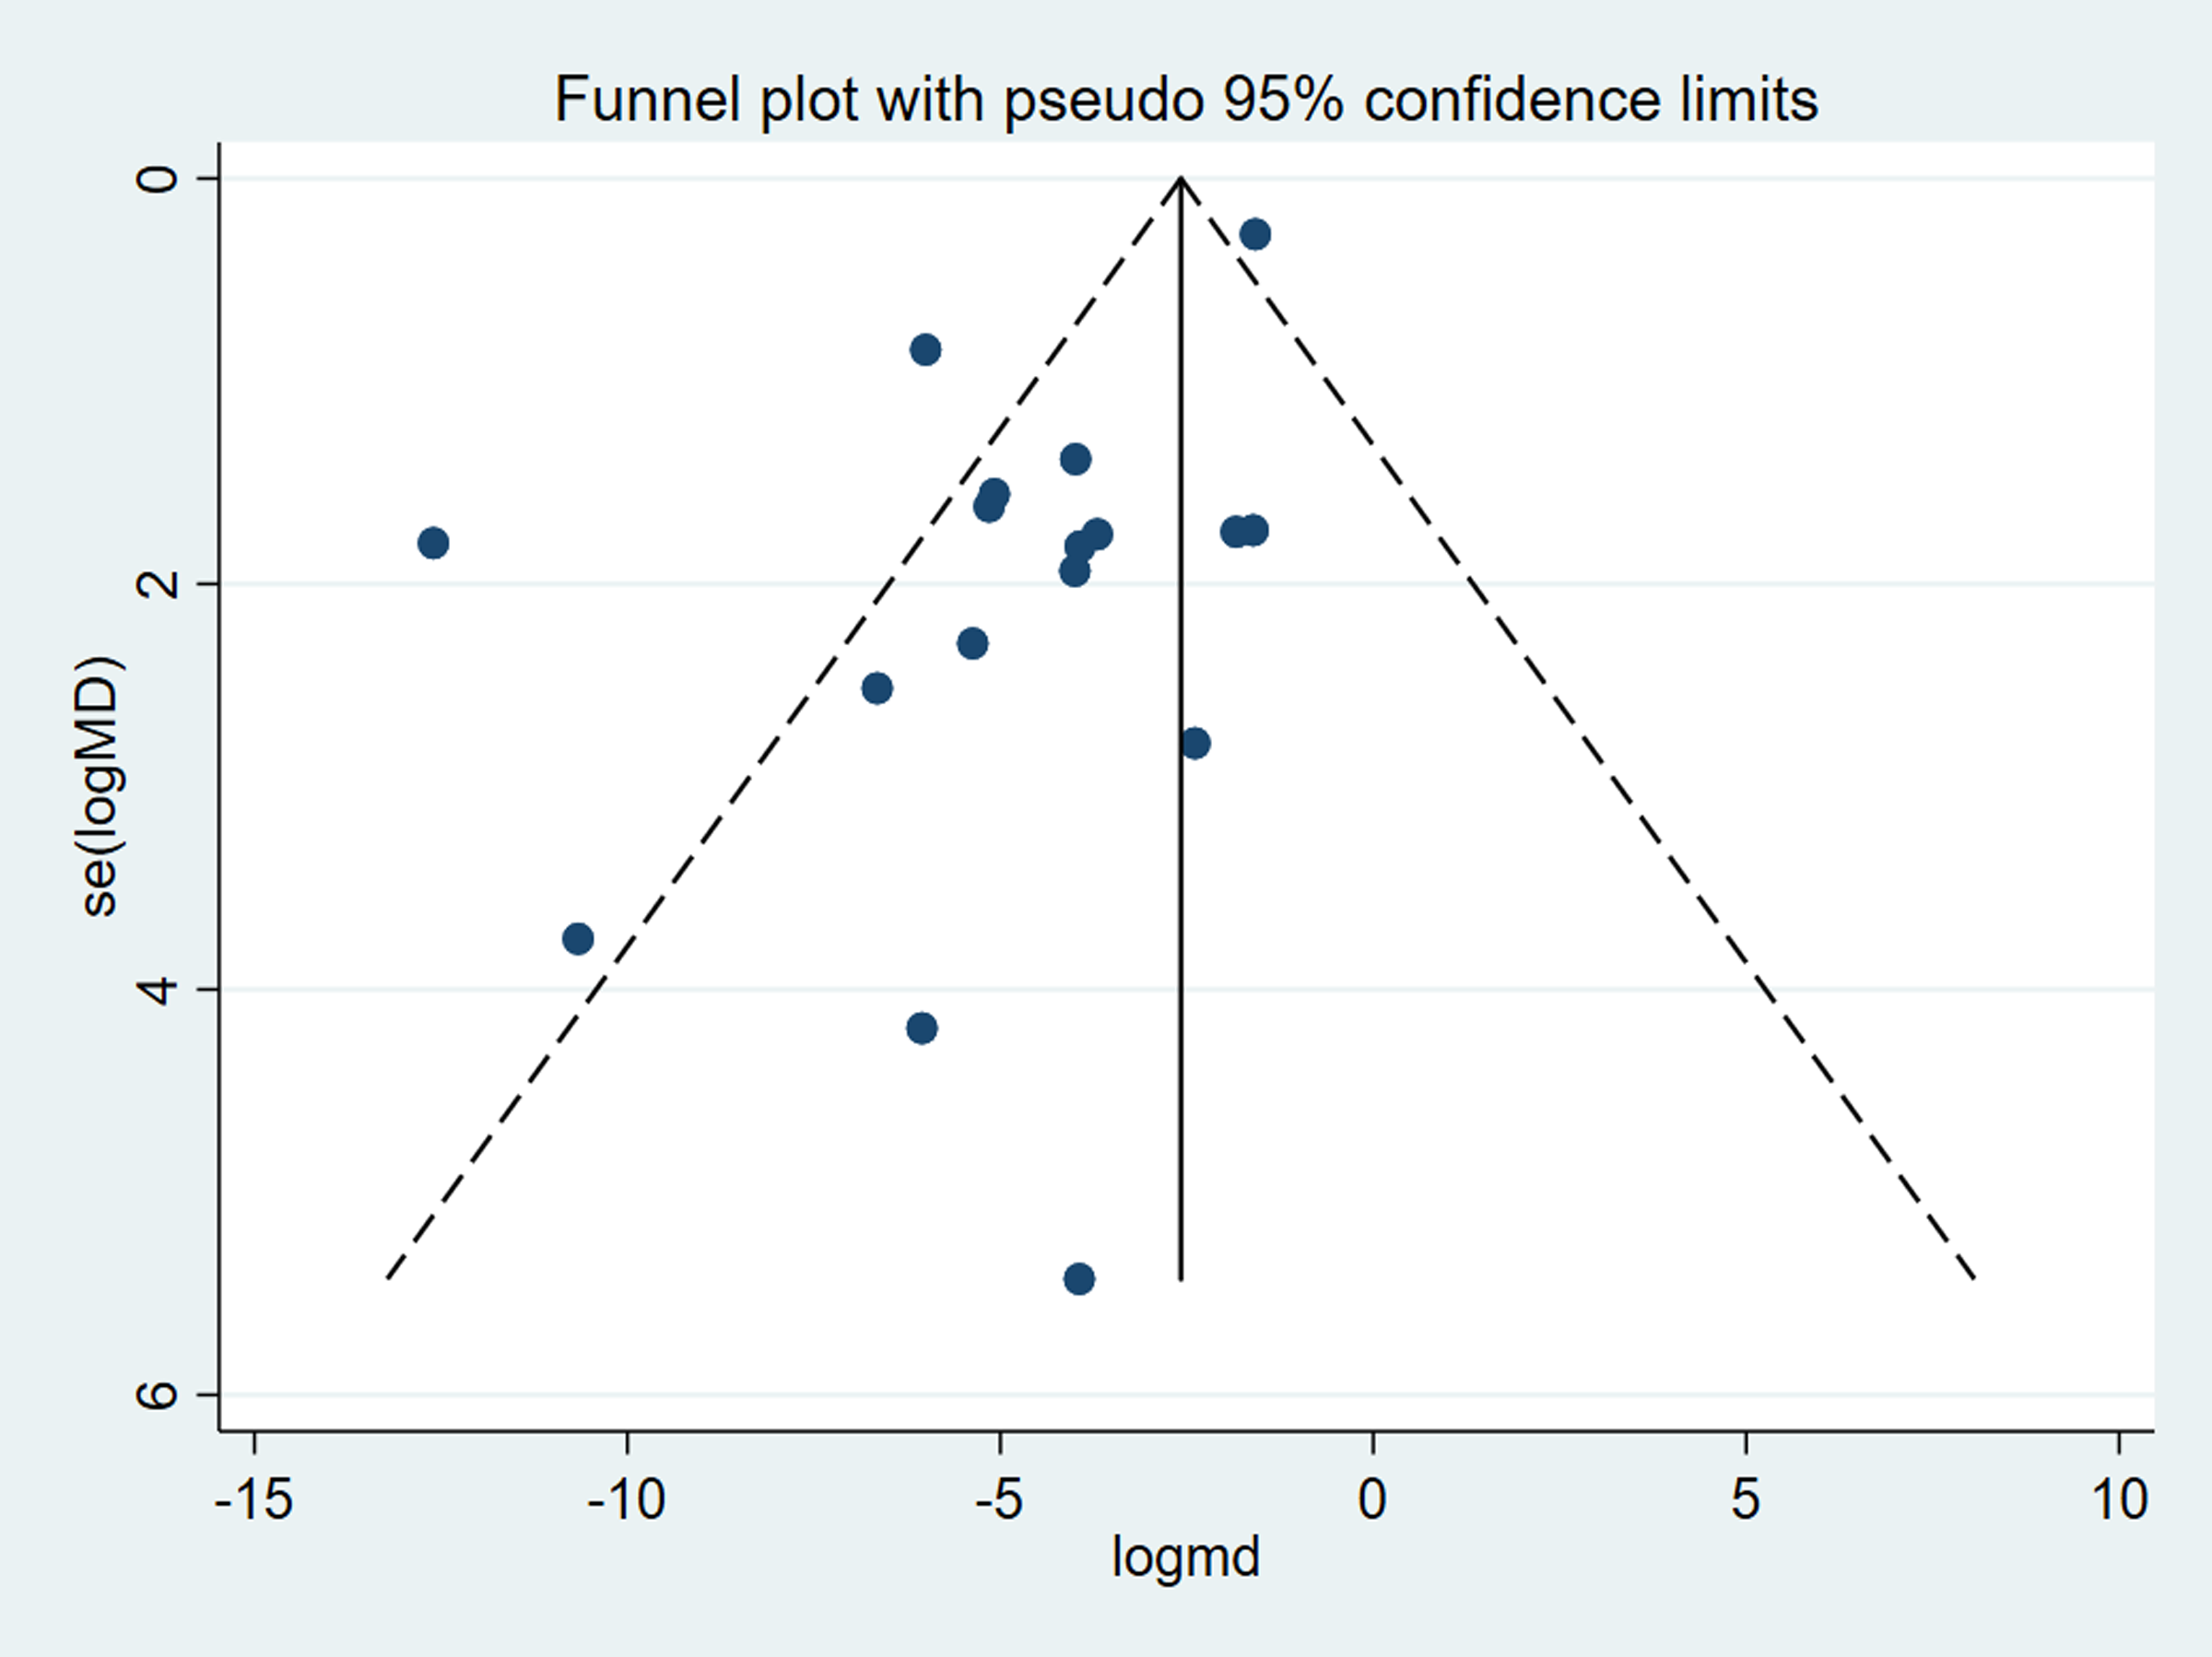


**Figure S25** Funnel plot for the publication bias of the body weight.

**Abbreviations:** MD, mean difference; SE, standard error.


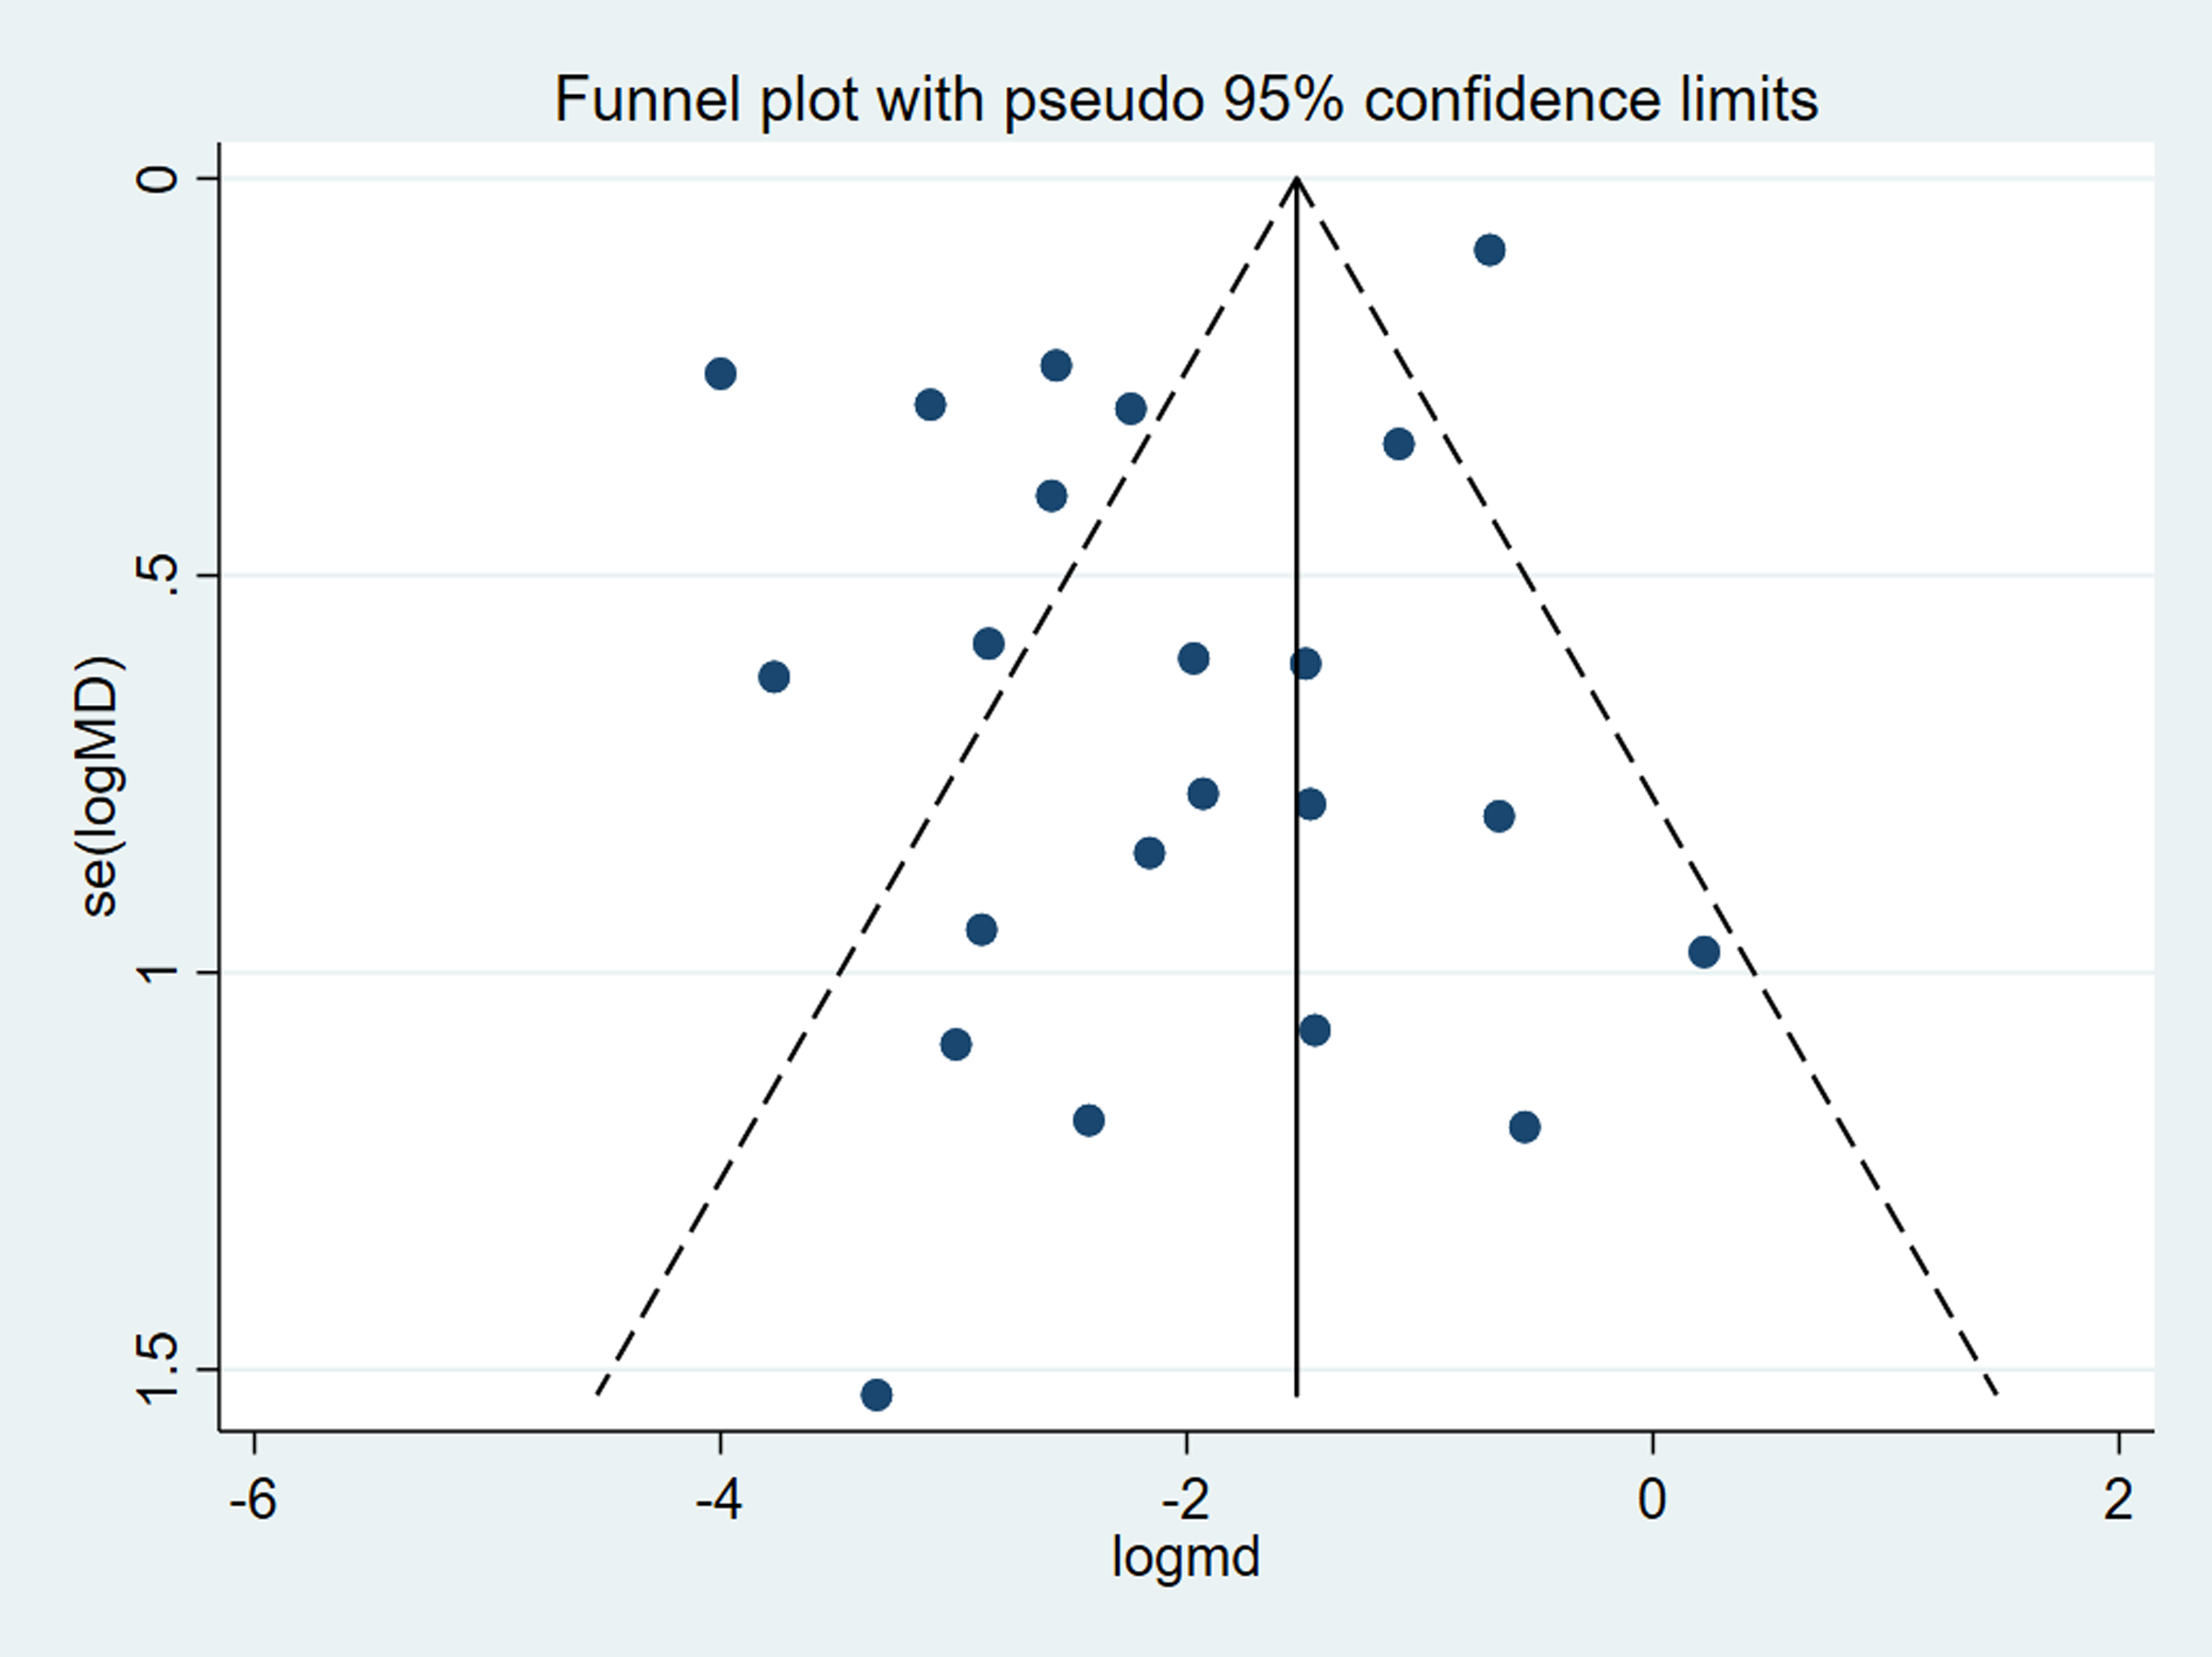


**Figure S26** Funnel plot for the publication bias of the BMI.


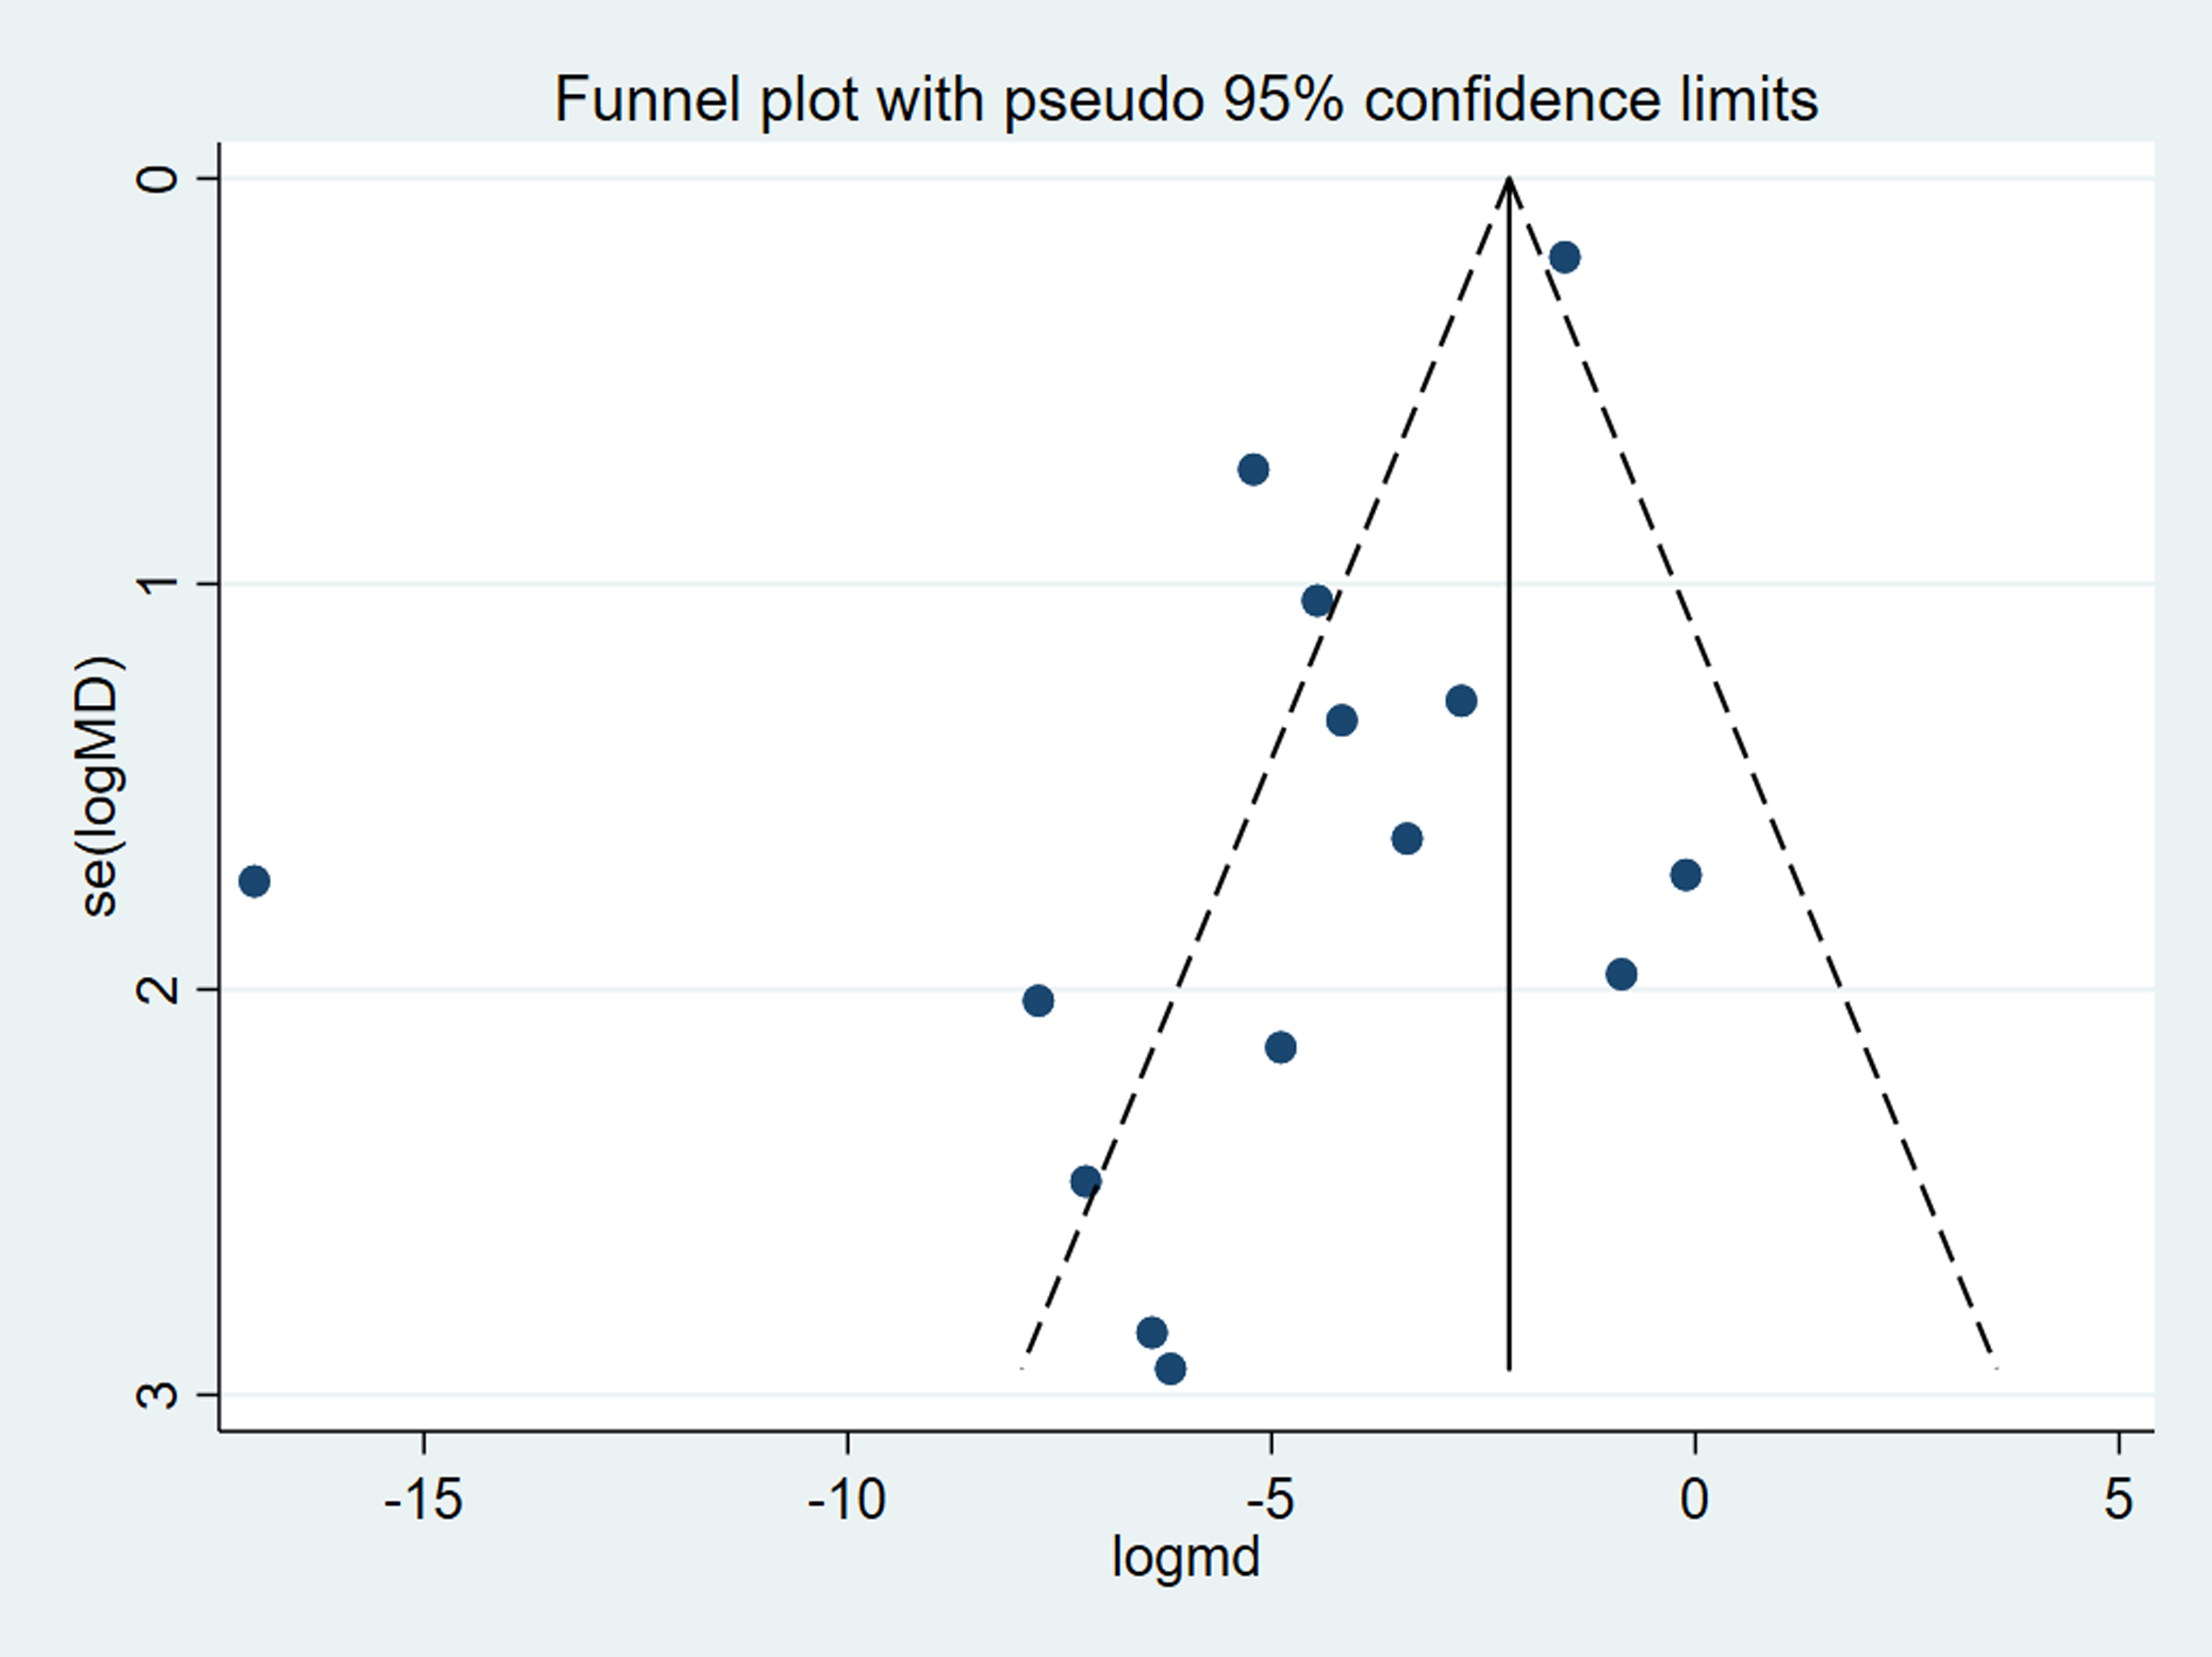


**Figure S27** Funnel plot for the publication bias of the WC.


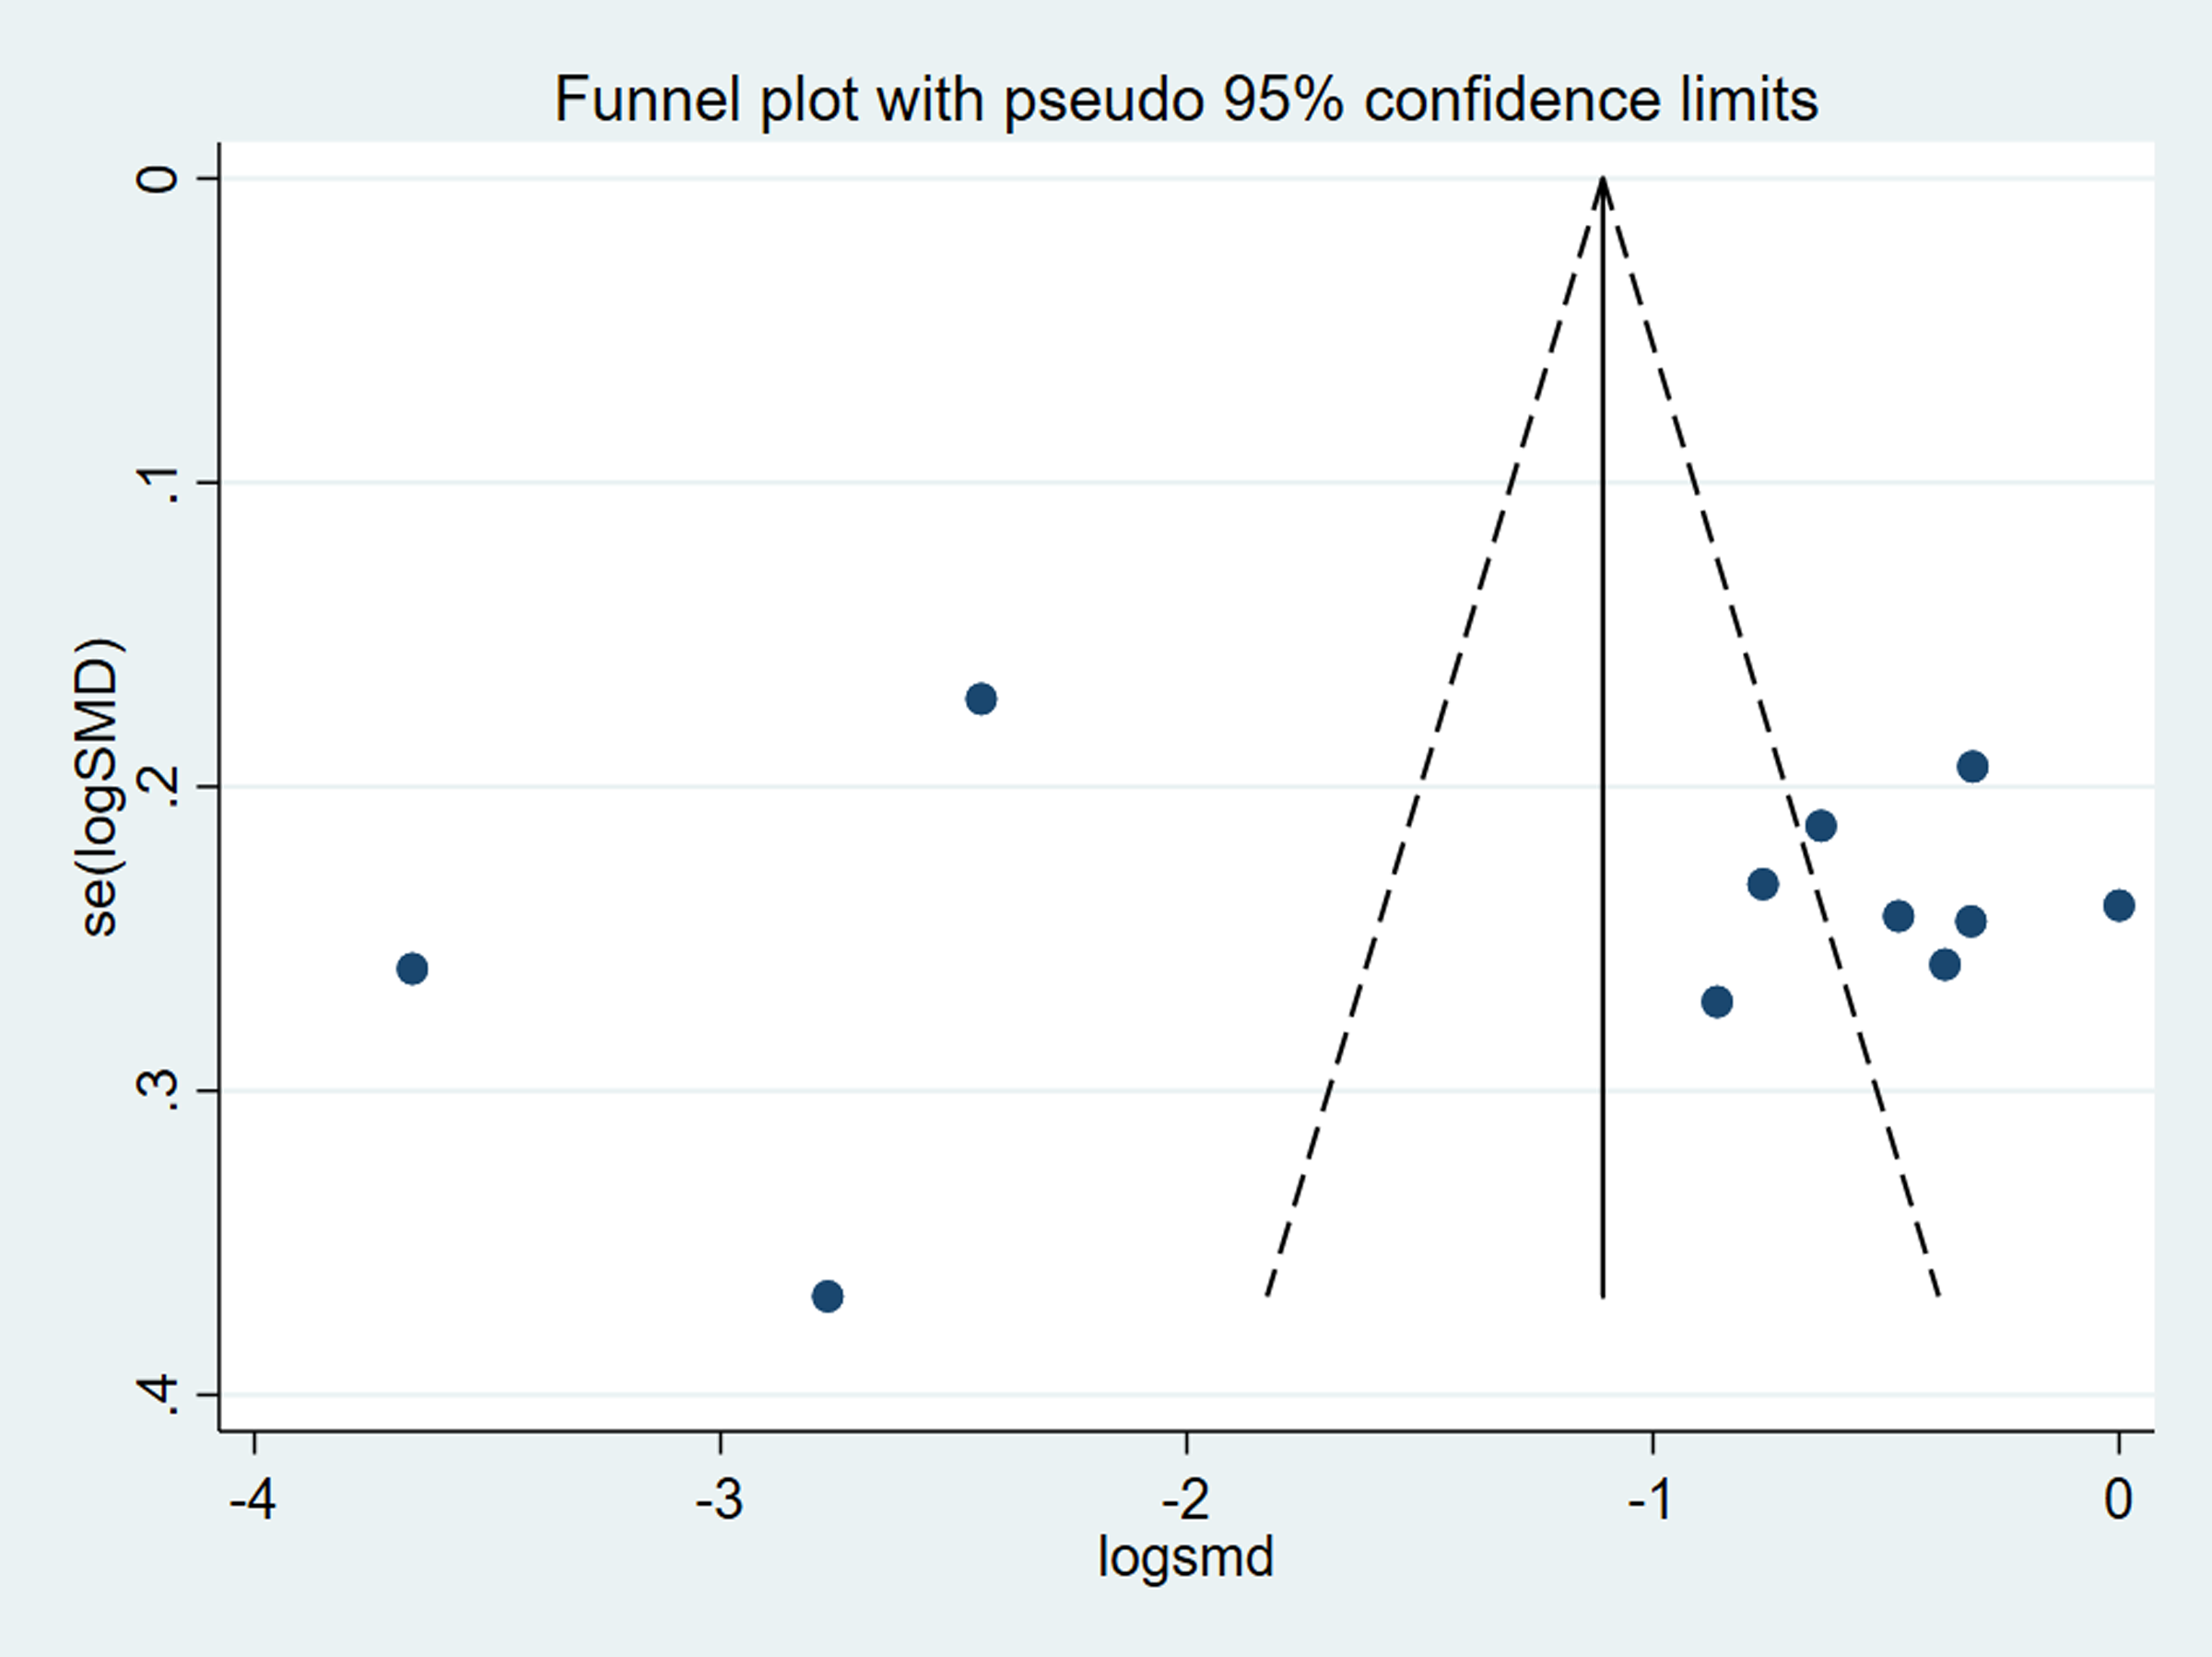


**Figure S28** Funnel plot for the publication bias of the TC.

**Abbreviation:** SMD, standard mean difference.


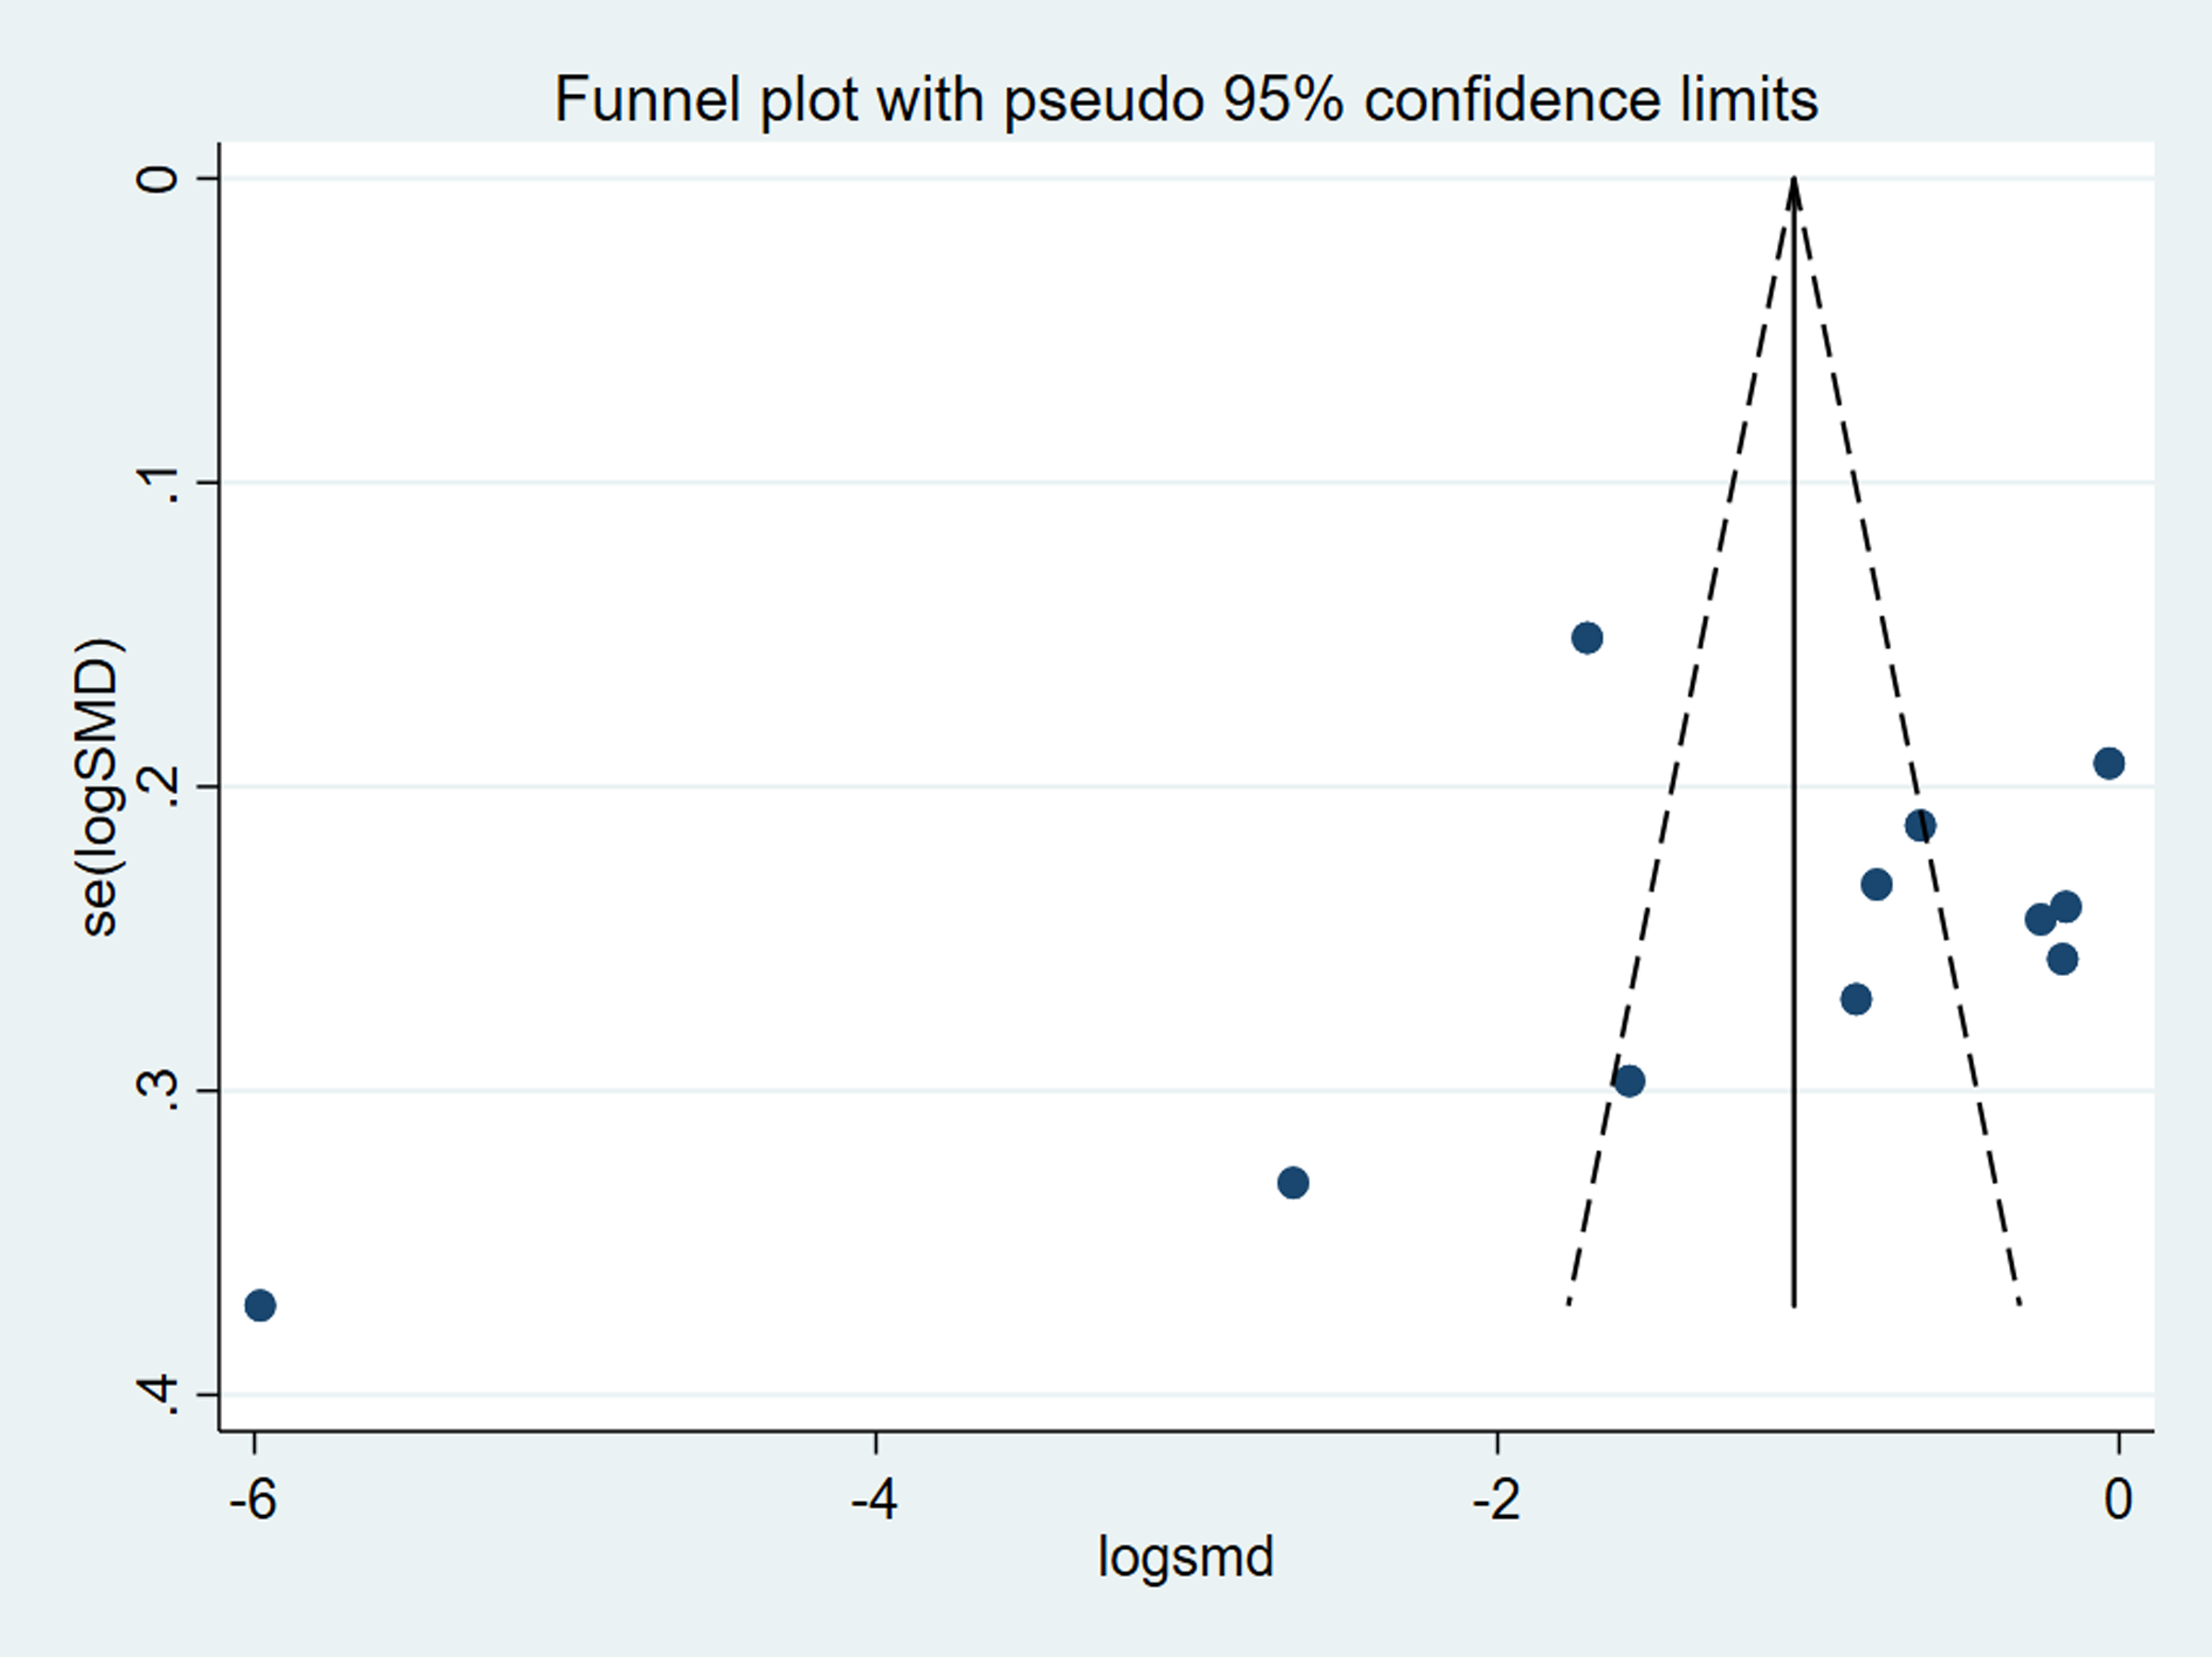


**Figure S29** Funnel plot for the publication bias of the TG.

1. Pan XF, Wang L, Pan A. Epidemiology and determinants of obesity in China. *Lancet Diabetes Endocrinol.* 2021;9(6):373-392.

2. Boutari C, Mantzoros CS. A 2022 update on the epidemiology of obesity and a call to action: as its twin COVID-19 pandemic appears to be receding, the obesity and dysmetabolism pandemic continues to rage on. *Metabolism.* 2022;133:155217.

3. Valenzuela PL, Carrera-Bastos P, Castillo-García A, Lieberman DE, Santos-Lozano A, Lucia AJNrc. Obesity and the risk of cardiometabolic diseases. *Nature reviews cardiology.* 2023;20:475-494.

4. Global Obesity Observatory. World Obesity Atlas 2023. <https://data.worldobesity.org/publications/?cat=19>. Published 2023. Accessed.

5. La Sala L, Pontiroli AE. Prevention of Diabetes and Cardiovascular Disease in Obesity. *Int J Mol Sci.* 2020;21(21):8178.

6. Mayoral LP, Andrade GM, Mayoral EP, et al. Obesity subtypes, related biomarkers & heterogeneity. *Indian J Med Res.* 2020;151(1):11-21.

7. Su X, Peng D. The exchangeable apolipoproteins in lipid metabolism and obesity. *Clin Chim Acta.* 2020;503:128-135.

8. Powell-Wiley TM, Poirier P, Burke LE, et al. Obesity and cardiovascular disease: a scientific statement from the American Heart Association. *Circulation.* 2021;143(21):e984-e1010.

9. Bagheri S, Zolghadri S, Stanek A. Beneficial Effects of Anti-Inflammatory Diet in Modulating Gut Microbiota and Controlling Obesity. *Nutrients.* 2022;14(19):3985.

10. Shao J, Li C, Bai L, et al. Recent evidence in support of traditional chinese medicine to restore normal leptin function in simple obesity. *Heliyon.* 2022;8(5):e09482.

11. Sumithran P, Prendergast LA, Delbridge E, et al. Long-term persistence of hormonal adaptations to weight loss. *N Engl J Med.* 2011;365(17):1597-1604.

12. Jensen MD, Ryan DH, Apovian CM, et al. 2013 AHA/ACC/TOS Guideline for the Management of Overweight and Obesity in Adults. *Circulation.* 2014;129(25_suppl_2):S102-138.

13. Yumuk V, Fruhbeck G, Oppert JM, Woodward E, Toplak H. An EASO position statement on multidisciplinary obesity management in adults. *Obes Facts.* 2014;7(2):96-101.

14. Kesztyus D, Erhardt J, Schonsteiner D, Kesztyus T. Therapeutic Treatment for Abdominal Obesity in Adults. *Dtsch Arztebl Int.* 2018;115(29-30):487-493.

15. Avgerinos KI, Spyrou N, Mantzoros CS, Dalamaga M. Obesity and cancer risk: Emerging biological mechanisms and perspectives. *Metabolism.* 2019;92:121-135.

16. Chen C, Liu J, Sun M, Liu W, Han J, Wang H. Acupuncture for type 2 diabetes mellitus: A systematic review and meta-analysis of randomized controlled trials. *Complement Ther Clin Pract.* 2019;36:100-112.

17. Wadden TA, Tronieri JS, Butryn ML. Lifestyle modification approaches for the treatment of obesity in adults. *Am Psychol.* 2020;75(2):235-251.

18. Wu H, Ballantyne CM. Metabolic Inflammation and Insulin Resistance in Obesity. *Circ Res.* 2020;126(11):1549-1564.

19. Zeng Q, Li N, Pan XF, Chen L, Pan A. Clinical management and treatment of obesity in China. *Lancet Diabetes Endocrinol.* 2021;9(6):393-405.

20. Nussbaumerova B, Rosolova H. Obesity and Dyslipidemia. *Curr Atheroscler Rep.* 2023:1-9.

21. Li X, Jia HX, Yin DQ, Zhang ZJ. Acupuncture for metabolic syndrome: systematic review and meta-analysis. *Acupunct Med.* 2021;39(4):253-263.

22. Yang H, Xiao ZY, Yin ZH, et al. Efficacy and safety of acupuncture for polycystic ovary syndrome: An overview of systematic reviews. *J Integr Med.* 2023;21(2):136-148.

23. Fan XL, Yu ML, Fu SP, Zhuang Y, Lu SF. Effectiveness of Acupuncture in Treatment of Simple Obesity in Animal Models: A Systematic Review and Meta-Analysis. *Evid Based Complement Alternat Med.* 2019;2019:5459326.

24. Fang S, Wang M, Zheng Y, Zhou S, Ji G. Acupuncture and Lifestyle Modification Treatment for Obesity: A Meta-Analysis. *Am J Chin Med.* 2017;45(2):239-254.

25. Zhang RQ, Tan J, Li FY, Ma YH, Han LX, Yang XL. Acupuncture for the treatment of obesity in adults: a systematic review and meta-analysis. *Postgrad Med J.* 2017;93(1106):743-751.

26. Chen J, Chen D, Ren Q, et al. Acupuncture and related techniques for obesity and cardiovascular risk factors: a systematic review and meta-regression analysis. *Acupunct Med.* 2020;38(4):227-234.

27. Gao Y, Wang Y, Zhou J, Hu Z, Shi Y. Effectiveness of Electroacupuncture for Simple Obesity: A Systematic Review and Meta-Analysis of Randomized Controlled Trials. *Evid Based Complement Alternat Med.* 2020;2020:2367610.

28. Zhong YM, Luo XC, Chen Y, et al. Acupuncture versus sham acupuncture for simple obesity: a systematic review and meta-analysis. *Postgrad Med J.* 2020;96(1134):221-227.

29. Yin Y, Zhao Q, Li S, et al. Efficacy of acupuncture and moxibustion therapy for simple obesity in adults: A meta-analysis of randomized controlled trials. *Medicine (Baltimore).* 2022;101(43):e31148.

30. Gao P, Xu X, Zhou M, Cui J, Yi T, Zhu T. The impact of acupuncture combined with acupoint catgut embedding on simple obesity: A systematic review and meta-analysis. *Medicine (Baltimore).* 2023;102(28):e34234.

31. Belivani M, Dimitroula C, Katsiki N, Apostolopoulou M, Cummings M, Hatzitolios AI. Acupuncture in the treatment of obesity: a narrative review of the literature. *Acupunct Med.* 2013;31(1):88-97.

32. Song AQ, Zhang YP, Chen R, Liang FX. Is Acupuncture Effective for Improving Insulin Resistance? A Systematic Review and Meta-analysis. *Curr Med Sci.* 2018;38(6):1109-1116.

33. Han J, Guo X, Meng XJ, et al. Acupuncture improved lipid metabolism by regulating intestinal absorption in mice. *World J Gastroenterol.* 2020;26(34):5118-5129.

34. Landgraaf RG, Bloem MN, Fumagalli M, Benninga MA, de Lorijn F, Nieuwdorp M. Acupuncture as multi-targeted therapy for the multifactorial disease obesity: a complex neuro-endocrine-immune interplay. *Frontiers in Endocrinology.* 2023;14:1236370.

35. Wang M, Liu W, Ge J, Liu S. The immunomodulatory mechanisms for acupuncture practice. *Front Immunol.* 2023;14:1147718.

36. Mittelbach J. *Clinical Study of Acupuncture Treatment of Obesity with CM3* [Doctor], Shandong University of Traditional Chinese Medicine; 2017.

37. Guyatt GH, Oxman AD, Vist GE, et al. GRADE: an emerging consensus on rating quality of evidence and strength of recommendations. *Bmj.* 2008;336(7650):924-926.

38. Jpt HJhwc-ho. Cochrane handbook for systematic reviews of interventions. 2008.

39. Page MJ, McKenzie JE, Bossuyt PM, et al. The PRISMA 2020 statement: An updated guideline for reporting systematic reviews. *International Journal of Surgery.* 2021;134:178-189.

40. Tong J, Chen JX, Zhang ZQ, et al. Clinical observation on simple obesity treated by acupuncture. *Chinese Acupuncture & Moxibustion.* 2011;31(08):697-701.

41. Liang L. *Acupuncture the Points of Spleen and Stomach Meridian Research on the Effects of Fasting Insulin Levels in Patients with Simple Obesity* [Master], Guangxi University of Chinese Medicine; 2013.

42. Zhang SQ, Wu JD. Clinical observation on 120 cases in the acupuncture treatment for spleen deficiency dampness type simple obesity. *Guid J Tradit Chin Med Pharm.* 2016;22(6):101-102.

43. Li PP, Li SA, Li RC, M L, Wang RH. Observation on the therapeutic effect of Bo's abdominal acupuncture in reducing abdominal fat in Sudanese women with simple obesity. *Modern Chinese Medicine.* 2017;37(5):42-44,50.

44. Li ZX, Xu NG, Zhang HH, Xie WT, Yi W. Effect of Acupuncture Combined with Kinesitherapy in Treatment of Simple Obesity. *Chinese General Practice.* 2019(A01).

45. Liu MZ, Liu YT, Yang LB. Effect of acupuncture on serum PYY and nesfatin-1 in obese patients with insulin resistance. *Journal of Acupuncture and Tuina Science.* 2021;19(6):432-437.

46. Min EJ. *The research and choosing acupoints methods based on Midnight-noon Ebb-flow Therapy for Obesity with Spleen qi deficiency and exuberant dampness type* [Master], Guangzhou University of Chinese Medicine; 2021.

47. Zhang YY, Li PP, Gu YJ. The effect of Jin's three-needle therapy on visceral fat in patients with simple obesity. *China's Naturopathy.* 2021;29(13):58-60.

48. Bi JY. *Clinical Effect of Acupuncture on Simple Obesity in Damp-Heat*

*Constitution and Its Effect on Lipid Metabolism* [Master], Shandong University of Traditional Chinese Medicine; 2022.

49. Qi GH, Shi JF. Clinical study on acupuncture treatment of 35 patients with simple obesity in Malta. *Medicine and Health.* 2022(10):162-164.

50. Jia SY, Wang Hl, Li L. The clinical study of acupuncture treatment for spleen deficiency dampness type simple obesity by invigorating spleen to eliminate dampness. *Journal of Practical Traditional Chinese Medicine.* 2023;39(1):154-156.

51. Yang L, Nie Y, Wen YL, Kang Q. Clinical Study onneedling"ShuiShu Fifty-seven Points"on Simple Obesity with Syndrome of Spleen and Kidney Yang Deficiency Obstruction. *Medicine and Health.* 2023(11):166-169.

52. Li DH. *Study on the therapeutic effect of low-wavelength electroacupuncture on simple obesity* [Dissertation], China Academy of Chinese Medical Sciences; 2005.

53. Luo SH. Clinical Observation on the Treatment of 60 Cases of Simple Obesity with acupuncture. *Journal of Clinical Acupuncture and Moxibustion.* 2007;23(9):17-18.

54. Xing HJ. *The Clinical Research on Acupuncture Combined with Dietary Adjustments and Aerobic Exercise for Treatment of Simple Obesity* [Master], Hebei Medical University; 2009.

55. Zhao LQ, Shi Y. Clinical study on the treatment for stomach-intestine excessive heat type simple obesity by electroacupuncture combined with diet and exercise therapy. *Journal of Anhui University of Chinese Medicine.* 2010;29(4):33-37.

56. Abdi H, Zhao B, Darbandi M, et al. The Effects of Body Acupuncture on Obesity: Anthropometric Parameters, Lipid Proﬁle, and Inﬂammatory and Immunologic Markers. *The Scientific World Journal.* 2012;2012(2012):603539.

57. Wang WJ, Xiao YP. Observation of curative effect of electroacupuncture therapy on obesity. *Chinese Journal of Primary Medicine and Pharmacy.* 2014;21(12):1878-1879.

58. Bae HI. *Clinical study of obesity treated by acusector combined with dietary adjustment therapy* [Dissertation], Nanjing University Of Chinese Medicine; 2016.

59. Xue WH, Yin QB, Liu L, Zhou TT, Wang YJ. Clinical study on the treatment for simple obesity by harmonic Yangming acupuncture combined with comprehensive intervention. *Hebei Journal of Traditional Chinese Medicine.* 2018;40(2):280-283.

60. Yin QB, Duan YF, Cheng XY, Xue WH, Wang YJ. Clinical observation of electroacupuncture combined with comprehensive intervention on simple obesity. *Hebei Journal of Traditional Chinese Medicine.* 2018;40(4):580-583.

61. Wang Hl. *A randomized controlled trial of electroacupuncture for the treatment of obesity to observed Resting Metabolic Rate* [Master], Guangzhou University of Chinese Medicine; 2020.

62. Zheng ZZ, Luo H, You QY, Wang J. 30 cases in the treatment for simple obesity by electroacupuncture combined with nutritional intervention. *Fujian Journal of Traditional Chinese Medicine.* 2021;52(2):51-52.

63. Liang ZM. *Observation on the curative effect of regulating mentality and spleen strengthening acupuncture on treatment for spleen-deficiency dampness type simple obesity* [Master], Guangzhou University of Chinese Medicine; 2022.

64. Ni W, Wang P, Chen HJ, et al. Obesity complicated with insulin resistance treated with the electroacupuncture at the combination of back-shu and front-mu points. *World Journal of Acupuncture - Moxibustion.* 2022;32(3):213-217.
